# Supplementary material for: Optic nerve head: A gatekeeper for vitreous infectious insults?
Source: Front Immunol. 2022 Sep 20;13:987771. doi: 10.3389/fimmu.2022.987771 (PMC9531234; doi:10.3389/fimmu.2022.987771)
Supplement: Supplementary file 4 [file Table_1.xlsx]

## Sheet: 表达差异详情表
Gene_id	Gene name	Gene description	FC(LPS/PBS)	Log2FC(LPS/PBS)	Pvalue	Padjust	Significant	Regulate	PBS1	PBS2	PBS3	PBS4	LPS1	LPS2	LPS3	LPS4	LPS5
ENSRNOG00000059786	AC107531.3	-	0.044	-4.49172	2.1429e-36	3.63564e-32	yes	down	7.72	14.54	10.07	7.01	0.46	0.57	0.27	0.59	0.22
ENSRNOG00000053367	AABR07064257.1	-	0.09	-3.47397	4.64841e-35	3.94325e-31	yes	down	8.09	17.5	10.82	9.17	0.84	1	0.86	1.53	0.67
ENSRNOG00000005879	Maml2	mastermind-like transcriptional coactivator 2 [Source:RGD Symbol;Acc:1587536]	0.058	-4.10466	2.77133e-32	1.56728e-28	yes	down	26.43	62.24	48.63	47.8	3.08	2.88	6.43	4.97	2.81
ENSRNOG00000049962	LOC100911860	ubiquitin carboxyl-terminal hydrolase 40-like [Source:RGD Symbol;Acc:6490066]	0.049	-4.34285	9.54437e-29	4.04824e-25	yes	down	2.18	4.32	3.14	2.99	0.2	0.15	0.09	0.3	0.05
ENSRNOG00000055846	AABR07013065.1	-	0.053	-4.25077	4.58325e-28	1.55519e-24	yes	down	6.57	11.09	9.17	9.2	0.76	0.55	0.28	0.55	0.18
ENSRNOG00000053576	AC126530.2	-	0.065	-3.93468	9.96532e-28	2.81786e-24	yes	down	8.89	20.85	11.79	10.84	0.75	0.9	0.59	1.65	0.32
ENSRNOG00000031202	Trim30c	tripartite motif-containing 30C [Source:RGD Symbol;Acc:1566132]	0.07	-3.83561	1.62435e-27	3.93697e-24	yes	down	5.83	11.61	11.39	8.55	1.17	0.29	4.65	0.91	0.55
ENSRNOG00000061053	AABR07007997.1	-	0.067	-3.89475	9.64531e-27	2.04553e-23	yes	down	4.95	12.86	7.96	6.87	0.46	0.41	0.34	1.18	0.33
ENSRNOG00000013078	Zcchc7	zinc finger CCHC-type containing 7 [Source:RGD Symbol;Acc:1310467]	0.103	-3.28231	3.63078e-25	6.84443e-22	yes	down	14.52	25.82	20.7	13.72	1.73	1.59	1.51	3.8	1.4
ENSRNOG00000051954	AC242863.1	-	0.04	-4.63579	1.16182e-24	1.97114e-21	yes	down	1.82	5.24	2.14	2.69	0.12	0.11	0.05	0.26	0.07
ENSRNOG00000053229	AABR07007905.2	-	0.063	-3.99536	1.85548e-24	2.86182e-21	yes	down	11.39	16.11	16.52	12.58	0.91	0.5	0.78	1.76	0.39
ENSRNOG00000039200	AABR07070046.1	-	0.114	-3.12685	3.77077e-24	5.33125e-21	yes	down	3.65	9.63	7.19	5.92	0.62	0.82	0.75	0.85	0.49
ENSRNOG00000005206	Kcnq3	potassium voltage-gated channel subfamily Q member 3 [Source:RGD Symbol;Acc:69222]	0.03	-5.04601	6.45477e-24	8.42397e-21	yes	down	16.74	43.44	30.55	9.79	0.94	0.18	0.63	1.05	0.11
ENSRNOG00000056490	AABR07013566.1	-	0.062	-4.01323	9.35677e-24	1.13391e-20	yes	down	3.05	6.01	2.93	3.17	0.16	0.13	0.23	0.47	0.13
ENSRNOG00000034030	AC130162.1	-	0.06	-4.06121	2.3643e-23	2.67418e-20	yes	down	2.73	5.9	2.8	2.65	0.19	0.21	0.08	0.42	0.14
ENSRNOG00000058209	AABR07063893.1	-	0.06	-4.06555	2.68582e-23	2.84797e-20	yes	down	6.26	14.88	8.66	7.65	0.51	0.43	0.46	1.22	0.16
ENSRNOG00000062127	AC134224.1	-	0.132	-2.92101	7.37696e-23	7.36221e-20	yes	down	25.06	40.79	38.11	26.34	4.92	5.98	2.97	5.06	1.99
ENSRNOG00000033407	LOC685406	LRRGT00062 [Source:RGD Symbol;Acc:1593850]	0.021	-5.6021	1.53798e-22	1.44963e-19	yes	down	2.43	8.83	7.18	6.85	0.2	0.12	0.03	0.18	0.1
ENSRNOG00000049961	AABR07037923.1	-	0.051	-4.29619	1.86592e-22	1.66617e-19	yes	down	2.94	7.69	4.67	4.58	0.17	0.2	0.18	0.65	0.09
ENSRNOG00000054990	AABR07060133.1	-	0.054	-4.20492	2.22027e-22	1.88346e-19	yes	down	10.71	15.92	15.9	9.38	1.11	0.76	2.27	1.36	0.49
ENSRNOG00000061264	AABR07058091.2	-	0.056	-4.1477	2.45143e-22	1.98052e-19	yes	down	3.48	9.17	6.56	5.19	0.34	0.43	0.36	0.67	0.12
ENSRNOG00000057430	AABR07039694.1	-	0.12	-3.05564	4.11161e-22	3.1708e-19	yes	down	16.21	37.38	22.58	22.1	3.08	2.63	2.36	4.61	1.59
ENSRNOG00000061900	AABR07047771.1	-	0.061	-4.03699	7.27681e-22	5.36775e-19	yes	down	2.71	7.51	3.93	3.52	0.15	0.21	0.15	0.64	0.2
ENSRNOG00000060509	LOC102556339	transcription initiation factor TFIID subunit 1-like [Source:RGD Symbol;Acc:7527757]	0.051	-4.29082	9.0419e-22	6.39187e-19	yes	down	2.89	7.65	4.53	4.72	0.33	0.19	0.1	0.58	0.07
ENSRNOG00000042471	RGD1560324	AADACL2 family member 3 [Source:MGI Symbol;Acc:MGI:3643798]	0.076	-3.70944	4.03251e-21	2.73662e-18	yes	down	2.9	6.71	5.24	5.21	0.54	0.27	0.34	0.6	0.13
ENSRNOG00000041870	Mir1893	microRNA 1893 [Source:MGI Symbol;Acc:MGI:3811424]	0.116	-3.1027	4.35543e-21	2.84209e-18	yes	down	3.22	4.98	5.15	3.17	0.6	0.43	0.3	0.71	0.32
ENSRNOG00000052732	AABR07062694.2	-	0.053	-4.24142	4.76223e-21	2.99245e-18	yes	down	1.82	4.07	2.38	2.03	0.15	0.07	0.08	0.31	0.06
ENSRNOG00000037911	LOC680227	LRRGT00193 [Source:RGD Symbol;Acc:1594204]	0.107	-3.22201	1.0729e-20	6.50102e-18	yes	down	24.44	52.29	41.1	38.14	6.54	2.94	2.83	6.93	2.93
ENSRNOG00000052774	AC123253.2	-	0.063	-3.9883	1.16131e-20	6.79409e-18	yes	down	2.31	5.21	3.03	3.12	0.2	0.08	0.23	0.42	0.11
ENSRNOG00000054780	AC132740.1	-	0.099	-3.32966	1.4638e-20	8.27827e-18	yes	down	9.51	25.25	15.03	15.22	1.77	1.65	1.2	2.54	0.72
ENSRNOG00000049504	AABR07009221.1	-	0.073	-3.77853	4.30001e-20	2.35335e-17	yes	down	3.78	9.11	5.72	4.77	0.65	0.45	0.24	0.64	0.1
ENSRNOG00000038225	Fbxo15	F-box protein 15 [Source:RGD Symbol;Acc:1310628]	0.059	-4.08303	4.72659e-20	2.50598e-17	yes	down	19.85	36.28	34.93	27.86	0.61	2.71	1.36	3.67	3.15
ENSRNOG00000056033	AC111632.2	-	0.051	-4.28659	7.74636e-20	3.98257e-17	yes	down	2.11	4.26	2.76	1.94	0.2	0.05	0.06	0.3	0.09
ENSRNOG00000047568	Vom2r64	vomeronasal 2 receptor, 64 [Source:RGD Symbol;Acc:1584665]	0.035	-4.81632	2.89932e-19	1.44676e-16	yes	down	28.78	65.76	41.17	31.99	1.03	0.68	2.74	1.25	0.41
ENSRNOG00000020532	Kcnq1	potassium voltage-gated channel subfamily Q member 1 [Source:RGD Symbol;Acc:621503]	0.12	-3.05613	8.15022e-19	3.95076e-16	yes	down	6.46	10.62	5.7	8.54	0.73	1.59	1.22	0.99	0.82
ENSRNOG00000045746	AABR07007744.1	-	0.078	-3.68956	3.53314e-18	1.66509e-15	yes	down	1.6	3.38	2.46	1.7	0.15	0.19	0.1	0.39	0.08
ENSRNOG00000008632	Invs	inversin [Source:RGD Symbol;Acc:1563359]	0.096	-3.37884	8.81087e-18	4.04014e-15	yes	down	6.02	15.43	11.06	8.55	1.7	1.17	0.33	1.68	1.34
ENSRNOG00000051951	AABR07034592.1	-	0.053	-4.24804	1.70899e-17	7.63019e-15	yes	down	0.9	2.46	1.83	1.76	0.03	0.18	0.05	0.14	0.05
ENSRNOG00000049650	AABR07018556.1	-	0.086	-3.53927	1.82329e-17	7.93177e-15	yes	down	12.66	42.26	21.9	18.86	1.75	3.58	1.43	2.49	0.71
ENSRNOG00000014768	Glis3	GLIS family zinc finger 3 [Source:RGD Symbol;Acc:1565505]	0.028	-5.14596	2.6615e-17	1.12887e-14	yes	down	8.89	13.39	13.96	6.56	0.23	0.18	0	0.53	0.11
ENSRNOG00000042118	Cplane1	ciliogenesis and planar polarity effector 1 [Source:RGD Symbol;Acc:1310081]	0.07	-3.82748	2.84461e-17	1.17712e-14	yes	down	11.66	45.25	12.73	6.25	0.29	0.1	0.48	0.04	0.22
ENSRNOG00000051486	AC112030.1	-	0.063	-3.99447	3.55815e-17	1.43732e-14	yes	down	35.7	67.56	50.2	43.96	2.57	3.36	2.27	7.09	0.45
ENSRNOG00000029663	Il1rapl1	interleukin 1 receptor accessory protein-like 1 [Source:RGD Symbol;Acc:727891]	0.076	-3.72731	3.79197e-17	1.49615e-14	yes	down	7.09	17.48	16.28	8.1	0.79	1.1	1.25	1.99	0.25
ENSRNOG00000061472	AABR07033720.1	-	0.025	-5.29731	5.29482e-17	2.04163e-14	yes	down	2.41	6.68	6.43	2.05	0.22	0.21	0.11	0.47	0.08
ENSRNOG00000042340	LOC679894	similar to THO complex subunit 2 (Tho2) [Source:RGD Symbol;Acc:1583596]	0.112	-3.1596	5.73905e-17	2.16375e-14	yes	down	2.87	7.99	4.1	3.34	0.45	0.45	0.31	1.03	0.28
ENSRNOG00000060937	AABR07059258.1	-	0.149	-2.7447	6.44624e-17	2.37754e-14	yes	down	12.3	28.79	16.24	17.89	6.37	6.85	4.66	9.2	5.51
ENSRNOG00000057798	AC102976.1	-	0.139	-2.84858	2.50385e-16	9.03838e-14	yes	down	8.89	20.06	9.14	10.02	1.08	1.78	1.39	2.04	1.5
ENSRNOG00000011261	Ttc14	tetratricopeptide repeat domain 14 [Source:RGD Symbol;Acc:1310045]	0.207	-2.2691	3.21012e-16	1.13464e-13	yes	down	6.48	9.8	5.95	5.32	2.41	1.96	1.3	2.52	1.22
ENSRNOG00000051257	AABR07039356.2	-	0.056	-4.15298	3.57453e-16	1.23766e-13	yes	down	27.14	39.45	38.82	30.08	7.89	3.61	1.81	3.65	1.5
ENSRNOG00000047117	AABR07001037.1	-	0.094	-3.40696	4.2644e-16	1.447e-13	yes	down	2.65	6.37	4.06	3.15	0.46	0.3	0.34	0.66	0.09
ENSRNOG00000045763	AABR07004022.1	-	0.002	-8.67528	5.70186e-16	1.89682e-13	yes	down	1.16	3.48	2.13	1.24	0	0	0	0	0
ENSRNOG00000006441	Zbtb25	zinc finger and BTB domain containing 25 [Source:RGD Symbol;Acc:735076]	0.161	-2.63201	9.60523e-16	3.13389e-13	yes	down	3.37	3.1	4.59	3.34	0.97	1.27	0.64	1.24	1.05
ENSRNOG00000017309	Rsrp1	arginine and serine rich protein 1 [Source:RGD Symbol;Acc:1359529]	0.221	-2.17965	1.08448e-15	3.47157e-13	yes	down	157.53	280.72	160.42	152.52	59.81	52.97	42.63	81.37	36.11
ENSRNOG00000055160	AABR07033249.1	-	0.012	-6.39877	1.17067e-15	3.67806e-13	yes	down	2.43	4.42	3.34	0.83	0.02	0	0	0.11	0.04
ENSRNOG00000004806	Strn	striatin [Source:RGD Symbol;Acc:3782]	0.147	-2.76214	1.20269e-15	3.70998e-13	yes	down	5.39	12.47	9.4	6.41	1.15	1.94	1.68	2.86	0.99
ENSRNOG00000032208	Eda	ectodysplasin-A [Source:RGD Symbol;Acc:1563178]	0.084	-3.5697	1.90283e-15	5.76491e-13	yes	down	143.76	361.49	333.13	246.43	25.06	17.33	7.98	52.09	7.34
ENSRNOG00000011586	LOC100909712	cyclin-L1-like [Source:RGD Symbol;Acc:6501887]	0.323	-1.6311	2.33987e-15	6.9646e-13	yes	down	19.65	27.39	17.15	20.39	7.69	7.53	5.18	10.9	7.38
ENSRNOG00000028149	Kansl1l	KAT8 regulatory NSL complex subunit 1-like [Source:RGD Symbol;Acc:1590799]	0.145	-2.78871	2.44526e-15	7.15282e-13	yes	down	3.22	6.02	5.73	3.08	0.5	0.74	0.46	0.94	0.35
ENSRNOG00000013282	Mctp1	multiple C2 and transmembrane domain containing 1 [Source:RGD Symbol;Acc:1305199]	0.09	-3.48127	3.71381e-15	1.06794e-12	yes	down	27.65	62.53	55.71	42.08	2.23	2.43	3.35	11.77	1.38
ENSRNOG00000060489	AABR07015639.1	-	0.088	-3.51191	4.19551e-15	1.18635e-12	yes	down	1.1	2.7	1.58	1.77	0.08	0.2	0.11	0.31	0.06
ENSRNOG00000060340	Psme4	proteasome activator subunit 4 [Source:RGD Symbol;Acc:1591971]	0.199	-2.32757	5.76502e-15	1.60343e-12	yes	down	6.51	12.78	12.71	9.94	2.47	1.84	1.22	3.7	1.36
ENSRNOG00000057039	AC124874.1	-	0.049	-4.35732	5.91775e-15	1.61936e-12	yes	down	2.17	7.13	5.01	4.45	0.25	0.31	0.09	0.51	0.01
ENSRNOG00000045909	Mir344i	microRNA 344i [Source:RGD Symbol;Acc:7489023]	0.066	-3.91906	7.65041e-15	2.06027e-12	yes	down	2.3	5.78	5.43	3.04	0.09	0.84	0.19	0.77	0.19
ENSRNOG00000011909	Rasa2	RAS p21 protein activator 2 [Source:RGD Symbol;Acc:3538]	0.27	-1.89023	8.34299e-15	2.18353e-12	yes	down	10.62	24.74	14.1	15.29	2.04	2.44	1.68	3.06	1.63
ENSRNOG00000056438	AC112624.1	-	0.087	-3.52727	8.36552e-15	2.18353e-12	yes	down	22.01	60.52	36.19	35.53	2.25	3.86	2.61	7.33	0.67
ENSRNOG00000052690	AABR07042361.1	-	0.112	-3.15599	8.77157e-15	2.25482e-12	yes	down	10.52	24.41	14.59	16.49	1.27	1.6	2.04	3.31	0.7
ENSRNOG00000031290	Trappc3l	trafficking protein particle complex 3-like [Source:RGD Symbol;Acc:2318506]	0.102	-3.29248	1.15499e-14	2.92472e-12	yes	down	26.45	65.81	44.94	41.38	3.57	3.88	4.59	8.83	1.16
ENSRNOG00000006001	Luc7l2	LUC7-like 2 pre-mRNA splicing factor [Source:RGD Symbol;Acc:1308651]	0.289	-1.79251	1.25243e-14	3.1248e-12	yes	down	19.22	34.35	24.59	19.15	9.16	7.17	5.97	10.65	5.78
ENSRNOG00000016813	Tia1	TIA1 cytotoxic granule-associated RNA binding protein [Source:RGD Symbol;Acc:1305742]	0.254	-1.97712	1.36058e-14	3.34544e-12	yes	down	7.6	11.24	10.3	7.47	2.57	2.04	1.89	3.65	2
ENSRNOG00000054196	AABR07048228.1	-	0.055	-4.17144	1.62414e-14	3.93645e-12	yes	down	1.02	1.77	1.13	1.05	0.08	0.09	0.04	0.14	0
ENSRNOG00000042036	AABR07028185.1	-	0.057	-4.13693	2.91942e-14	6.97619e-12	yes	down	4.22	13.86	6.07	5.27	0.57	0.49	0.24	0.67	0.13
ENSRNOG00000008475	Fut9	fucosyltransferase 9 [Source:RGD Symbol;Acc:619955]	0.073	-3.77564	3.17842e-14	7.48958e-12	yes	down	12.77	19.54	16.27	13.09	0.31	0.79	0.49	1.29	0.08
ENSRNOG00000021718	Cspp1	centrosome and spindle pole associated protein 1 [Source:RGD Symbol;Acc:1307055]	0.184	-2.44347	4.13523e-14	9.61074e-12	yes	down	12.13	24.66	15.78	11	2.11	1.9	3.08	3.16	1.49
ENSRNOG00000009836	Rbm26	RNA binding motif protein 26 [Source:RGD Symbol;Acc:1308297]	0.204	-2.29167	4.95072e-14	1.13505e-11	yes	down	23.19	52.03	38.95	24.3	4.85	6.35	8.91	10.16	2.83
ENSRNOG00000048235	AABR07039778.1	-	0.049	-4.34081	5.22842e-14	1.16944e-11	yes	down	1.04	2.33	1.74	1.37	0.05	0.16	0.04	0.16	0
ENSRNOG00000007472	Setd5	SET domain containing 5 [Source:RGD Symbol;Acc:1310433]	0.21	-2.25412	5.23857e-14	1.16944e-11	yes	down	7.81	11.07	9.62	8.56	3.21	3.27	0.7	5.49	1.66
ENSRNOG00000013045	Setd7	SET domain containing 7, histone lysine methyltransferase [Source:RGD Symbol;Acc:1586346]	0.189	-2.40117	5.98103e-14	1.31785e-11	yes	down	25.79	42.52	32.56	18.56	2.87	3.75	23.05	10.46	4.01
ENSRNOG00000047877	AABR07064622.1	-	0.087	-3.52847	7.27802e-14	1.58306e-11	yes	down	10.26	30.19	16.16	16.76	0.32	1.7	1.32	3.22	1.18
ENSRNOG00000012929	Wsb1	WD repeat and SOCS box-containing 1 [Source:RGD Symbol;Acc:1307835]	0.131	-2.9276	7.85351e-14	1.68662e-11	yes	down	26.24	70.29	36.19	30.48	5.27	6.81	2.78	13.15	3.91
ENSRNOG00000059056	AABR07048637.1	-	0.048	-4.37229	8.73894e-14	1.85331e-11	yes	down	0.56	1.47	1.06	1.19	0	0.05	0.06	0.07	0.06
ENSRNOG00000009696	Mdm4	MDM4 regulator of p53 [Source:RGD Symbol;Acc:1309306]	0.279	-1.84222	1.23091e-13	2.57823e-11	yes	down	16.59	30.84	23.9	19.06	7.69	6.65	6.73	9.94	4.66
ENSRNOG00000025768	Clk1	CDC-like kinase 1 [Source:RGD Symbol;Acc:1311469]	0.21	-2.25456	1.48856e-13	3.07987e-11	yes	down	54.3	112	75.84	43.82	17.76	14.86	17.17	21.34	12.13
ENSRNOG00000055547	AABR07001519.1	-	0.151	-2.72939	1.51464e-13	3.09606e-11	yes	down	7.28	19.57	16.85	13.17	2.42	7.61	4.93	7.42	2.1
ENSRNOG00000045597	AABR07018132.1	-	0.076	-3.72408	1.67753e-13	3.38822e-11	yes	down	23.01	52.79	28.35	25.94	1.2	2.49	1.66	6.84	0.44
ENSRNOG00000059506	AC124926.2	-	0.038	-4.7265	1.79006e-13	3.57295e-11	yes	down	0.76	2.76	1.27	1.42	0.04	0	0.07	0.16	0.02
ENSRNOG00000027770	Trpm3	transient receptor potential cation channel, subfamily M, member 3 [Source:RGD Symbol;Acc:1304888]	0.248	-2.01022	1.91027e-13	3.76346e-11	yes	down	21.14	50.22	27.41	29.25	10.25	8.71	4.38	12.49	3.37
ENSRNOG00000017310	Rnpc3	RNA-binding region (RNP1, RRM) containing 3 [Source:RGD Symbol;Acc:1582776]	0.261	-1.93625	1.92987e-13	3.76346e-11	yes	down	7.4	14.94	11.74	9.16	4.47	5.44	3.79	4.19	3.53
ENSRNOG00000016303	Zfp236	zinc finger protein 236 [Source:RGD Symbol;Acc:1309670]	0.109	-3.19104	4.04563e-13	7.79979e-11	yes	down	5.92	4.85	2.89	1.24	0.24	0.28	0.1	0.32	0.18
ENSRNOG00000056748	AC229945.1	-	0.04	-4.63069	4.1717e-13	7.95248e-11	yes	down	0.63	1.95	0.78	1.02	0.05	0.1	0	0.06	0.02
ENSRNOG00000048904	AABR07004232.1	-	0.058	-4.10681	4.27594e-13	8.06062e-11	yes	down	2.32	5.7	3.4	3.82	0.12	0.12	0.06	0.55	0.2
ENSRNOG00000016047	Macf1	microtubule-actin crosslinking factor 1 [Source:RGD Symbol;Acc:1306057]	0.232	-2.10516	5.04233e-13	9.4009e-11	yes	down	32.31	56.03	47.8	45.66	12.51	11.66	12.16	17.57	6.7
ENSRNOG00000050408	AABR07064590.1	-	0.087	-3.53113	7.40256e-13	1.36513e-10	yes	down	6.95	10.26	8.63	4.04	0.41	0.9	0.29	1.34	0.36
ENSRNOG00000031406	Hps3	HPS3, biogenesis of lysosomal organelles complex 2 subunit 1 [Source:RGD Symbol;Acc:1310548]	0.341	-1.553	7.74905e-13	1.41366e-10	yes	down	7.38	11.07	8.79	9.36	2.33	2.49	1.82	2.1	1.67
ENSRNOG00000019175	Ercc6l2	ERCC excision repair 6 like 2 [Source:RGD Symbol;Acc:1561537]	0.251	-1.99595	9.97789e-13	1.8009e-10	yes	down	13.22	25.75	25.64	22.33	1.82	2.68	2.34	5.82	1.53
ENSRNOG00000049178	AABR07028414.1	-	0.042	-4.59049	1.03936e-12	1.85619e-10	yes	down	0.86	2.79	1.12	1.03	0.04	0.08	0.03	0.17	0
ENSRNOG00000038436	RGD1307100	similar to RIKEN cDNA D630029K19 [Source:RGD Symbol;Acc:1307100]	0.296	-1.75718	1.21043e-12	2.13919e-10	yes	down	22.64	43.11	34.67	29.19	8.34	12.04	10.01	16.96	8.47
ENSRNOG00000025787	Spag6l	sperm associated antigen 6-like [Source:RGD Symbol;Acc:1310892]	0.086	-3.53173	1.23029e-12	2.15186e-10	yes	down	20.85	42.21	44.01	34.38	4.83	1.6	3.27	3.76	0.1
ENSRNOG00000046711	AC128353.1	-	0.059	-4.07714	1.61722e-12	2.79976e-10	yes	down	0.69	1.44	1.13	0.88	0.13	0.07	0	0.07	0.04
ENSRNOG00000061114	AABR07049286.1	-	0.098	-3.3529	1.6876e-12	2.8921e-10	yes	down	2.07	5.45	3.79	4.01	0.14	0.21	0.27	1.03	0.23
ENSRNOG00000004971	Txlng	taxilin gamma [Source:RGD Symbol;Acc:1564371]	0.277	-1.84947	1.71714e-12	2.9133e-10	yes	down	5.03	5.88	4.43	5.27	1.51	1.67	0.63	1.84	0.96
ENSRNOG00000014530	Nav2	neuron navigator 2 [Source:RGD Symbol;Acc:619778]	0.066	-3.92631	1.94963e-12	3.27498e-10	yes	down	7.47	22.74	27.94	13.05	0.52	0.06	0.04	2.54	0.17
ENSRNOG00000060614	Pxdn	peroxidasin [Source:RGD Symbol;Acc:1560694]	0.238	-2.06919	2.12739e-12	3.53856e-10	yes	down	8.59	17.65	16.6	9.93	2.67	3.79	2.65	2.82	2.66
ENSRNOG00000045839	AABR07011857.1	-	0.065	-3.93417	2.20246e-12	3.62785e-10	yes	down	0.76	1.86	1.35	1.11	0.14	0.04	0.01	0.17	0.05
ENSRNOG00000004109	Zfpm2	zinc finger protein, multitype 2 [Source:RGD Symbol;Acc:1306021]	0.301	-1.73197	2.24193e-12	3.65737e-10	yes	down	2.97	6.41	5.46	5.44	1.13	1.06	0.98	1.57	0.82
ENSRNOG00000051664	AABR07010878.1	-	0.09	-3.47864	2.40035e-12	3.87851e-10	yes	down	1.05	3.1	2.23	1.89	0.09	0.36	0.06	0.31	0.11
ENSRNOG00000018413	Per3	period circadian regulator 3 [Source:RGD Symbol;Acc:621581]	0.191	-2.38522	2.86362e-12	4.58341e-10	yes	down	43.39	93.58	57.46	67.89	6.93	3.76	4.72	10.03	3.83
ENSRNOG00000011613	Ppip5k2	diphosphoinositol pentakisphosphate kinase 2 [Source:RGD Symbol;Acc:1590765]	0.167	-2.58117	2.8961e-12	4.59208e-10	yes	down	11.82	23.4	12.18	11.77	3.4	3.1	1.48	3.62	1.79
ENSRNOG00000062006	AC113785.5	-	0.039	-4.6769	3.11423e-12	4.89222e-10	yes	down	12.01	31.1	20.67	26.14	0	1.25	0.66	2.31	0.3
ENSRNOG00000024671	Dmxl1	Dmx-like 1 [Source:RGD Symbol;Acc:1307692]	0.204	-2.29273	3.26562e-12	5.08298e-10	yes	down	7.37	14.41	10.32	9.93	2.15	1.6	2.07	3.47	0.85
ENSRNOG00000050039	AABR07070858.1	-	0.067	-3.90404	3.31636e-12	5.11503e-10	yes	down	0.84	2.06	1.57	0.88	0.03	0.13	0.06	0.19	0.02
ENSRNOG00000060077	AABR07065485.1	-	0.034	-4.87055	4.05398e-12	6.19638e-10	yes	down	0.85	2.69	0.56	0.83	0.06	0	0.02	0.11	0.02
ENSRNOG00000010027	Atr	ATR serine/threonine kinase [Source:RGD Symbol;Acc:1305796]	0.188	-2.41347	5.28296e-12	8.00274e-10	yes	down	2.65	9.71	7.73	8.66	0.71	0.6	0.75	2.02	0.34
ENSRNOG00000011439	Grk5	G protein-coupled receptor kinase 5 [Source:RGD Symbol;Acc:61985]	0.221	-2.1766	5.82867e-12	8.75125e-10	yes	down	10.56	23.67	17.34	24.17	3.02	4.76	2.26	3.58	2.89
ENSRNOG00000062099	AABR07058169.2	-	0.075	-3.74459	6.61557e-12	9.8456e-10	yes	down	3.34	10.98	5.86	6.87	0.89	0.22	0.3	0.71	0.3
ENSRNOG00000036911	Bicd1	BICD cargo adaptor 1 [Source:RGD Symbol;Acc:1309444]	0.119	-3.0764	7.82734e-12	1.15477e-09	yes	down	13.89	34.24	24.26	23	0.92	1.28	1.42	2.5	0.48
ENSRNOG00000028730	Lcn12	lipocalin 12 [Source:RGD Symbol;Acc:1589474]	0.009	-6.72418	8.46379e-12	1.2379e-09	yes	down	1.63	2.62	3.22	2	0	0	0	0.04	0.06
ENSRNOG00000052062	Tut4	terminal uridylyl transferase 4 [Source:RGD Symbol;Acc:1310138]	0.31	-1.69138	1.03198e-11	1.49646e-09	yes	down	8.65	9.67	7.7	12	2.69	2.2	2.76	3.65	2.82
ENSRNOG00000057556	Pdzrn3	PDZ domain containing RING finger 3 [Source:RGD Symbol;Acc:1305250]	0.236	-2.08152	1.08e-11	1.55283e-09	yes	down	21.69	36.58	33.91	29.73	23.62	21.46	27.77	27.21	14.24
ENSRNOG00000057392	AABR07042859.1	-	0.038	-4.71011	1.40233e-11	1.99932e-09	yes	down	5.28	8.21	8.5	6.38	0.3	0	0	0.99	0.19
ENSRNOG00000017113	Ccnt2	cyclin T2 [Source:RGD Symbol;Acc:1309205]	0.215	-2.21673	1.5439e-11	2.18282e-09	yes	down	9.05	17.38	13.81	9.38	3.36	4.48	1.98	6.54	2.03
ENSRNOG00000019319	Fchsd2	FCH and double SH3 domains 2 [Source:RGD Symbol;Acc:1304812]	0.264	-1.92014	1.59447e-11	2.23568e-09	yes	down	10.35	22.59	25.45	20.13	4.05	3.04	0.87	3.48	3.01
ENSRNOG00000057738	AC104053.1	-	0.047	-4.41212	1.63222e-11	2.26986e-09	yes	down	1.78	3.46	1.67	1.49	0.02	0.09	0.08	0.31	0
ENSRNOG00000002291	Brwd3	bromodomain and WD repeat domain containing 3 [Source:RGD Symbol;Acc:1559445]	0.13	-2.94339	2.06566e-11	2.84926e-09	yes	down	4.23	4.01	2.78	5.64	0.2	0.19	0.08	0.66	0.07
ENSRNOG00000049314	AABR07069524.1	-	0.083	-3.58231	2.26804e-11	3.10319e-09	yes	down	1.1	2.52	1.32	1.39	0.16	0.13	0.02	0.32	0.05
ENSRNOG00000020763	Snrnp70	small nuclear ribonucleoprotein U1 subunit 70 [Source:RGD Symbol;Acc:1307120]	0.267	-1.90485	2.46021e-11	3.3392e-09	yes	down	21.24	29.37	20.82	16.53	10.71	8.29	5.48	14.62	5.74
ENSRNOG00000019069	Nxf1	nuclear RNA export factor 1 [Source:RGD Symbol;Acc:62014]	0.379	-1.40139	2.80786e-11	3.78081e-09	yes	down	33.12	55.95	40.59	43.53	17.39	16.61	13.95	23	11.09
ENSRNOG00000057941	AABR07036331.1	-	0.252	-1.98847	2.83787e-11	3.79113e-09	yes	down	3.92	5.28	4.94	4.42	1.72	1.31	1.76	0.89	1.3
ENSRNOG00000003359	Ogt	O-linked N-acetylglucosamine (GlcNAc) transferase [Source:RGD Symbol;Acc:62060]	0.216	-2.20861	2.89387e-11	3.83573e-09	yes	down	28.53	60	40.93	32.88	9.57	9.19	6.01	14.36	3.29
ENSRNOG00000055486	AABR07025316.1	-	0.062	-4.00973	2.92955e-11	3.85292e-09	yes	down	1.81	5.61	2.76	2.99	0.08	0.12	0.08	0.55	0.14
ENSRNOG00000054519	AABR07053179.1	-	0.079	-3.65834	3.52168e-11	4.59607e-09	yes	down	1.74	4.56	2.66	3	0.45	0.09	0.06	0.53	0.08
ENSRNOG00000002075	Cnot6l	CCR4-NOT transcription complex, subunit 6-like [Source:RGD Symbol;Acc:1309128]	0.222	-2.17053	4.40052e-11	5.69917e-09	yes	down	4.09	7.29	5.11	6.07	0.79	0.63	0.59	1.73	0.26
ENSRNOG00000062175	AABR07034274.1	-	0.027	-5.22873	4.461e-11	5.73374e-09	yes	down	4.14	6.16	4.17	7.79	0	0.31	0	0.12	0.27
ENSRNOG00000007175	Mier1	MIER1 transcriptional regulator [Source:RGD Symbol;Acc:1562337]	0.345	-1.53454	5.17525e-11	6.60175e-09	yes	down	26.23	47.33	48.7	36.89	7.66	9.71	13.37	12.68	5.8
ENSRNOG00000010050	Stard9	StAR-related lipid transfer domain containing 9 [Source:RGD Symbol;Acc:1593360]	0.244	-2.03726	5.70605e-11	7.22454e-09	yes	down	10.39	21.31	12.82	7.45	3.94	3.37	2.69	5.28	3
ENSRNOG00000053509	AABR07017716.1	-	0.077	-3.69095	6.48043e-11	8.14423e-09	yes	down	0.56	2.07	1.27	0.85	0.08	0.19	0.04	0.06	0.07
ENSRNOG00000002932	Wdr19	WD repeat domain 19 [Source:RGD Symbol;Acc:1306997]	0.156	-2.68407	6.9048e-11	8.61374e-09	yes	down	7.59	17.47	25.94	27.66	0.48	0.56	0.36	3.52	0.47
ENSRNOG00000020155	Mapk8	mitogen-activated protein kinase 8 [Source:RGD Symbol;Acc:621506]	0.296	-1.75589	7.26632e-11	8.99857e-09	yes	down	10.22	15.52	13.83	12.53	4.12	3.77	2.42	5.47	0.67
ENSRNOG00000038002	Ccdc62	coiled-coil domain containing 62 [Source:RGD Symbol;Acc:1586391]	0.17	-2.55563	7.57725e-11	9.31563e-09	yes	down	9.81	19.67	18.07	12.33	1.38	3.02	3.71	1.69	1.53
ENSRNOG00000031031	Zfp292	zinc finger protein 292 [Source:RGD Symbol;Acc:61931]	0.239	-2.06616	7.7774e-11	9.4929e-09	yes	down	9.16	18.68	12.06	11.12	4.47	2.71	0.36	1.57	0.47
ENSRNOG00000014750	Tasor	transcription activation suppressor [Source:RGD Symbol;Acc:1595469]	0.191	-2.38838	7.99744e-11	9.69176e-09	yes	down	3.65	6.3	4.6	4.76	1.47	0.56	0.55	1.25	0.36
ENSRNOG00000058094	AABR07028902.1	-	0.19	-2.39346	8.66173e-11	1.04223e-08	yes	down	4.42	7.26	6.27	6.14	0.68	0.98	1.2	1.76	0.89
ENSRNOG00000041450	Mir1251	microRNA 1251 [Source:MGI Symbol;Acc:MGI:4834231]	0.284	-1.81644	9.77016e-11	1.16733e-08	yes	down	18.19	29.58	30.2	19.1	10.8	8.37	8.86	11.88	5.92
ENSRNOG00000016680	Nsd1	nuclear receptor binding SET domain protein 1 [Source:RGD Symbol;Acc:1307748]	0.299	-1.74292	9.9028e-11	1.1749e-08	yes	down	15.53	27.9	20.47	19.23	5.09	5.38	2.96	5.77	3.45
ENSRNOG00000046256	Ralgapa1	Ral GTPase activating protein catalytic alpha subunit 1 [Source:RGD Symbol;Acc:620642]	0.237	-2.07616	1.28031e-10	1.50846e-08	yes	down	10.48	19.14	15.74	12.2	4.32	3.17	1.49	5.39	1.97
ENSRNOG00000030775	Adarb2	adenosine deaminase, RNA-specific, B2 [Source:RGD Symbol;Acc:621519]	0.055	-4.18506	1.30577e-10	1.52784e-08	yes	down	5.61	24.93	11.36	3.63	0.21	0.4	0	0.52	0.09
ENSRNOG00000009156	Tra2a	transformer 2 alpha homolog [Source:RGD Symbol;Acc:1562563]	0.306	-1.70952	1.32849e-10	1.54377e-08	yes	down	17.57	25.08	18.7	14.77	7.93	5.19	2.49	8.67	5.28
ENSRNOG00000022196	Bmpr2	bone morphogenetic protein receptor type 2 [Source:RGD Symbol;Acc:71082]	0.325	-1.62141	1.34937e-10	1.55738e-08	yes	down	12.74	15.36	13.67	13.46	4.85	3.64	2.96	6.12	2.24
ENSRNOG00000013802	Slc25a36	solute carrier family 25 member 36 [Source:RGD Symbol;Acc:1591928]	0.229	-2.1249	1.47633e-10	1.69239e-08	yes	down	14.14	29.23	19.03	17.44	6.45	3.4	4.45	11.05	3.88
ENSRNOG00000018317	Aak1	AP2 associated kinase 1 [Source:RGD Symbol;Acc:1305520]	0.163	-2.61788	1.82238e-10	2.06869e-08	yes	down	6.55	15.69	11.44	15.7	1.1	0.84	2.4	3.81	2.31
ENSRNOG00000038987	AABR07034295.1	Ab2-093 [Source:NCBI gene;Acc:498084]	0.035	-4.85166	1.82897e-10	2.06869e-08	yes	down	0.68	2.15	1.47	0.48	0.04	0.09	0	0.08	0
ENSRNOG00000005116	LOC108353446	40S ribosomal protein S2 pseudogene [Source:RGD Symbol;Acc:11481307]	0.235	-2.09131	1.95935e-10	2.20148e-08	yes	down	8.34	10.24	10.26	12.74	2.17	2.58	1.79	3.94	1.76
ENSRNOG00000056178	AABR07064299.1	-	0.012	-6.32859	2.16005e-10	2.41102e-08	yes	down	6.8	25	17.11	11.77	0.25	0.04	0	0.69	0.06
ENSRNOG00000024863	Fam76b	family with sequence similarity 76, member B [Source:RGD Symbol;Acc:1311077]	0.278	-1.84496	2.33454e-10	2.58875e-08	yes	down	6.17	13.14	11.06	8.64	2.66	2.54	1.83	3.57	1.07
ENSRNOG00000000378	AABR07044914.1	catenin alpha 3 [Source:NCBI gene;Acc:361839]	0.161	-2.63261	2.39528e-10	2.63885e-08	yes	down	3.59	7.76	5.93	3.34	0.7	0.65	0.55	0.94	1.07
ENSRNOG00000020479	Pik3c2a	phosphatidylinositol-4-phosphate 3-kinase, catalytic subunit type 2 alpha [Source:RGD Symbol;Acc:1310389]	0.261	-1.93744	2.42606e-10	2.65552e-08	yes	down	4.07	5.85	5.98	4.77	1	1.2	1.48	2.07	0.69
ENSRNOG00000019848	Rbm39	RNA binding motif protein 39 [Source:RGD Symbol;Acc:1310071]	0.273	-1.8753	2.52008e-10	2.74075e-08	yes	down	72.28	140.39	118.28	87.69	26.94	30.84	41.62	41.95	23.01
ENSRNOG00000000593	Rev3l	REV3 like, DNA directed polymerase zeta catalytic subunit [Source:RGD Symbol;Acc:1307087]	0.283	-1.81981	2.58365e-10	2.79199e-08	yes	down	4.98	14.96	11.47	11.29	0.67	1.41	0.64	1.35	0.48
ENSRNOG00000055624	AC243566.1	-	0.057	-4.12325	2.641e-10	2.83589e-08	yes	down	0.63	2.7	1.24	1.24	0	0.1	0.13	0.13	0.03
ENSRNOG00000058163	AC107446.3	-	0.03	-5.04966	2.66896e-10	2.84789e-08	yes	down	2.25	6.68	4.17	2.45	0.04	0.24	0	0.27	0
ENSRNOG00000008782	Pnisr	PNN interacting serine and arginine rich protein [Source:RGD Symbol;Acc:1307395]	0.197	-2.34623	2.72968e-10	2.89448e-08	yes	down	8.27	19.06	12.68	10.95	1.99	2.99	2.31	5.08	0.93
ENSRNOG00000009196	Rc3h2	ring finger and CCCH-type domains 2 [Source:RGD Symbol;Acc:1304833]	0.337	-1.56708	2.90504e-10	3.0613e-08	yes	down	3.63	4.59	4.82	3.57	1.29	1.42	1.38	1.7	0.82
ENSRNOG00000053060	Zfc3h1	zinc finger, C3H1-type containing [Source:RGD Symbol;Acc:1306287]	0.264	-1.91985	3.32093e-10	3.47796e-08	yes	down	4.65	8.62	5.82	3.8	1.83	0.54	2.19	1.95	1.11
ENSRNOG00000022414	Zfp142	zinc finger protein 142 [Source:RGD Symbol;Acc:1309648]	0.254	-1.97485	3.64004e-10	3.78877e-08	yes	down	8.06	7.79	10.98	8.59	1.37	1.03	1.35	2.49	1.03
ENSRNOG00000062001	AABR07014301.3	-	0.004	-8.04042	4.34677e-10	4.49679e-08	yes	down	1.36	6.66	3.33	0.33	0	0	0	0	0
ENSRNOG00000025278	Scai	suppressor of cancer cell invasion [Source:RGD Symbol;Acc:1594720]	0.161	-2.63324	4.82554e-10	4.96182e-08	yes	down	4.78	10.3	14.09	21	0.27	0.82	1.06	1.12	0.55
ENSRNOG00000056656	AABR07044049.1	-	0.135	-2.88709	5.10648e-10	5.21907e-08	yes	down	2.07	9.23	10.64	7.9	0.45	1.12	1.86	2.41	1.46
ENSRNOG00000013516	Sf3b1	splicing factor 3b, subunit 1 [Source:RGD Symbol;Acc:620148]	0.427	-1.22862	5.62999e-10	5.71455e-08	yes	down	29.06	35.79	28.68	28.5	15.99	12.87	11.73	20.91	10.41
ENSRNOG00000022160	Rtp2	receptor (chemosensory) transporter protein 2 [Source:RGD Symbol;Acc:1565722]	0.093	-3.42095	5.65864e-10	5.71455e-08	yes	down	6.15	5.46	6.56	2.93	0.29	0.77	0.04	0.62	0.74
ENSRNOG00000045583	AABR07002068.1	-	0.049	-4.34114	5.70836e-10	5.73065e-08	yes	down	4.16	3.28	3.24	9.09	0.32	0.35	0	0.44	0
ENSRNOG00000057291	AABR07019088.1	-	0.247	-2.01997	5.86063e-10	5.78988e-08	yes	down	11.25	19.04	17.06	11.68	4.21	4.21	2.19	4.14	3.98
ENSRNOG00000010921	Taf1d	TATA-box binding protein associated factor, RNA polymerase I subunit D [Source:RGD Symbol;Acc:1309627]	0.214	-2.22266	5.86204e-10	5.78988e-08	yes	down	8.61	15.76	12.28	9.16	1.08	3.34	2.09	3.34	2.89
ENSRNOG00000055056	AABR07062390.2	-	0.127	-2.98012	5.86973e-10	5.78988e-08	yes	down	8	21.24	17.2	14.2	1.55	1.45	1.95	4	0.52
ENSRNOG00000016334	Ptbp3	polypyrimidine tract binding protein 3 [Source:RGD Symbol;Acc:621671]	0.207	-2.26966	5.94889e-10	5.80765e-08	yes	down	9.64	18.76	15	9.55	2.35	2.18	0.49	2.8	1.26
ENSRNOG00000049259	LOC102549842	zinc finger protein 91-like [Source:RGD Symbol;Acc:7600894]	0.309	-1.69498	5.95621e-10	5.80765e-08	yes	down	3.4	7.01	6.37	4.75	1.24	1.75	2.05	12.48	2.12
ENSRNOG00000027430	Ikzf2	IKAROS family zinc finger 2 [Source:RGD Symbol;Acc:1308686]	0.16	-2.63988	6.15146e-10	5.93343e-08	yes	down	12.23	15.22	21.02	5.55	0.68	0.35	0.19	2.19	0.79
ENSRNOG00000046027	AABR07034730.1	-	0.105	-3.25208	6.15515e-10	5.93343e-08	yes	down	0.63	1.2	1.13	0.71	0.03	0.07	0.07	0.22	0.08
ENSRNOG00000047132	Zfp182	zinc finger protein 182 [Source:RGD Symbol;Acc:6490591]	0.221	-2.17719	6.75171e-10	6.47173e-08	yes	down	2.87	3.21	2.34	1.97	0.3	0.66	0.74	0.6	0.6
ENSRNOG00000051848	AABR07032622.1	-	0.065	-3.93409	7.12712e-10	6.79319e-08	yes	down	3.65	9.47	5.23	12.22	3.23	3.85	6.77	4.01	0.37
ENSRNOG00000002036	Paxbp1	PAX3 and PAX7 binding protein 1 [Source:RGD Symbol;Acc:1584739]	0.223	-2.16663	7.71801e-10	7.304e-08	yes	down	4.49	8.62	6.17	5.79	1.01	1.77	1.31	2.16	0.49
ENSRNOG00000032258	Swt1	SWT1 RNA endoribonuclease homolog [Source:RGD Symbol;Acc:1308695]	0.341	-1.55144	7.74915e-10	7.304e-08	yes	down	3.58	5.63	5.54	5.04	1.62	2.04	1.08	2.33	1.42
ENSRNOG00000011440	Ccdc39	coiled-coil domain containing 39 [Source:RGD Symbol;Acc:1306277]	0.224	-2.15608	7.80361e-10	7.3147e-08	yes	down	2.89	6.89	5.05	2.98	1.12	1.45	1.48	2.22	0.82
ENSRNOG00000017030	Arid1b	AT-rich interaction domain 1B [Source:RGD Symbol;Acc:708504]	0.22	-2.18388	8.14321e-10	7.59108e-08	yes	down	20.47	33.59	44.98	24.36	3.93	1.76	3.6	5.27	1.35
ENSRNOG00000022395	Tnrc6c	trinucleotide repeat containing adaptor 6C [Source:RGD Symbol;Acc:1310027]	0.361	-1.46916	8.23119e-10	7.63117e-08	yes	down	2.2	2.32	1.96	2.55	1.06	0.79	0.58	0.95	0.53
ENSRNOG00000031760	Fmn1	formin 1 [Source:RGD Symbol;Acc:1306349]	0.125	-3.00346	9.07386e-10	8.36669e-08	yes	down	2.7	4.35	10.57	6.76	1.34	0.34	0.15	0.67	0.09
ENSRNOG00000015488	Tead1	TEA domain transcription factor 1 [Source:RGD Symbol;Acc:1549742]	0.151	-2.72898	9.16348e-10	8.40365e-08	yes	down	2.37	5.98	6.17	4.36	0.91	0.66	1.69	0.56	0.46
ENSRNOG00000059027	AC098008.5	-	0.049	-4.34662	1.04065e-09	9.49232e-08	yes	down	2.21	4.17	3.28	3.16	0.13	0.39	0.08	0.25	0
ENSRNOG00000008652	Phip	pleckstrin homology domain interacting protein [Source:RGD Symbol;Acc:1564964]	0.319	-1.65059	1.05792e-09	9.5982e-08	yes	down	5.01	8.41	5.24	6.29	2.24	2.18	1.99	2.88	1.12
ENSRNOG00000011879	Nfat5	nuclear factor of activated T-cells 5 [Source:RGD Symbol;Acc:1309142]	0.349	-1.52073	1.09143e-09	9.84956e-08	yes	down	24.46	35.02	27.38	21.96	8.22	11.21	17.61	8.69	12.11
ENSRNOG00000014856	Etnk1	ethanolamine kinase 1 [Source:RGD Symbol;Acc:1308204]	0.328	-1.60794	1.33137e-09	1.19513e-07	yes	down	18.28	28.31	17.35	19.22	8.04	4.88	6.83	9.07	4.51
ENSRNOG00000013618	Ankrd10	ankyrin repeat domain 10 [Source:RGD Symbol;Acc:1310501]	0.412	-1.27873	1.39951e-09	1.24969e-07	yes	down	29.72	45.52	38.08	33.02	14.13	14.34	11.44	19.01	11.41
ENSRNOG00000060246	Klrd1	killer cell lectin like receptor D1 [Source:RGD Symbol;Acc:2978]	0.058	-4.09604	1.42186e-09	1.263e-07	yes	down	1.06	3.65	1.95	2.09	0.15	0.26	0	0.13	0.1
ENSRNOG00000050847	AABR07027902.1	-	0.056	-4.15736	1.43572e-09	1.26867e-07	yes	down	2.33	6.4	4.9	3.98	0	0.05	0.17	0.81	0.23
ENSRNOG00000005564	Ubn2	ubinuclein 2 [Source:RGD Symbol;Acc:1310722]	0.368	-1.44355	1.4662e-09	1.28889e-07	yes	down	7.16	11.03	8.08	6.72	3.25	2.01	1.69	3	1.67
ENSRNOG00000030213	Vps13c	vacuolar protein sorting 13 homolog C [Source:RGD Symbol;Acc:1560364]	0.244	-2.0334	1.49882e-09	1.31077e-07	yes	down	7.47	13.9	9.78	7.67	1.75	1.49	2.31	2.81	1.16
ENSRNOG00000052036	AC127076.1	-	0.042	-4.56222	1.66872e-09	1.45187e-07	yes	down	3.65	10.7	3.89	6.66	0	0.3	0	0.64	0.34
ENSRNOG00000061317	AABR07011733.1	-	0.041	-4.62298	1.93273e-09	1.67299e-07	yes	down	1.6	5.36	2.41	1.99	0	0.12	0.21	0.19	0.05
ENSRNOG00000000161	Chm	CHM Rab escort protein [Source:RGD Symbol;Acc:2340]	0.265	-1.91541	2.17796e-09	1.8757e-07	yes	down	3.62	7.76	3.53	3.91	1.57	0.81	0.49	1.7	1.07
ENSRNOG00000047314	Tk1	thymidine kinase 1 [Source:RGD Symbol;Acc:621014]	3.962	1.98631	2.22308e-09	1.90489e-07	yes	up	3.3	3.77	3.84	3.41	7.43	15.43	9.75	9.48	17.57
ENSRNOG00000023668	Scyl1	SCY1 like pseudokinase 1 [Source:RGD Symbol;Acc:1307330]	0.168	-2.57694	2.25643e-09	1.92374e-07	yes	down	2917.92	5327.25	6595.4	3037.16	216.57	640.81	1089.48	982.02	231.12
ENSRNOG00000004207	Eml5	EMAP like 5 [Source:RGD Symbol;Acc:1303275]	0.173	-2.53011	2.35803e-09	2.00031e-07	yes	down	2.67	12.83	6.38	4.01	0.74	0.68	0.6	1.78	0.3
ENSRNOG00000018395	Usp40	ubiquitin specific peptidase 40 [Source:RGD Symbol;Acc:1309613]	0.285	-1.80983	2.40249e-09	2.02789e-07	yes	down	4.14	6.03	6.99	6.49	2.03	2.03	1.51	2.56	0.76
ENSRNOG00000046787	AC244815.1	-	0.009	-6.75616	2.43997e-09	2.04933e-07	yes	down	1.64	3.87	4.56	2.21	0	0	0	0	0.13
ENSRNOG00000049302	Chd9	chromodomain helicase DNA binding protein 9 [Source:RGD Symbol;Acc:1306795]	0.434	-1.20329	2.50299e-09	2.0919e-07	yes	down	6.88	8.3	6.5	10.17	2.25	2.06	2.15	3.93	1.84
ENSRNOG00000036913	Resf1	retroelement silencing factor 1 [Source:RGD Symbol;Acc:1309621]	0.222	-2.17265	2.77334e-09	2.30649e-07	yes	down	8.38	17.01	15.94	9.8	2	3.63	2.09	5.29	1.08
ENSRNOG00000021044	Gpatch8	G patch domain containing 8 [Source:RGD Symbol;Acc:1596463]	0.369	-1.43859	2.82001e-09	2.33387e-07	yes	down	9.82	12.87	11.31	11.56	3.05	2.32	2.85	4.97	2.01
ENSRNOG00000039241	Ythdc2	YTH domain containing 2 [Source:RGD Symbol;Acc:1563192]	0.099	-3.33856	2.85953e-09	2.35508e-07	yes	down	0.57	0.73	1.39	1.09	0.14	0.06	0.01	0.22	0.05
ENSRNOG00000042679	Lcor	ligand dependent nuclear receptor corepressor [Source:RGD Symbol;Acc:1311704]	0.235	-2.08834	2.93723e-09	2.40739e-07	yes	down	3.81	6.58	4.05	4.57	0.84	1.02	1.52	2.5	1.29
ENSRNOG00000000699	Selplg	selectin P ligand [Source:RGD Symbol;Acc:1307971]	2.525	1.33634	2.9648e-09	2.41831e-07	yes	up	40.23	33.07	35.21	36.97	68.34	79.05	84.24	133.18	82.69
ENSRNOG00000006841	Ano4	anoctamin 4 [Source:RGD Symbol;Acc:1310252]	0.242	-2.04875	3.06988e-09	2.49204e-07	yes	down	12.57	29.05	20.29	15.68	6.16	3.09	2.26	7.76	2.18
ENSRNOG00000053741	AABR07052664.1	-	0.122	-3.03404	3.69744e-09	2.98718e-07	yes	down	0.91	1.79	0.72	0.78	0.13	0.1	0.15	0.2	0.03
ENSRNOG00000049584	LOC103693129	nuclear receptor ROR-alpha-like [Source:RGD Symbol;Acc:9405052]	0.11	-3.18884	3.76201e-09	3.01941e-07	yes	down	2.13	3.71	3.04	1.81	0.4	1.94	0.04	0.15	0.42
ENSRNOG00000061151	AABR07013654.1	-	0.079	-3.66543	3.77293e-09	3.01941e-07	yes	down	2.12	5.72	3.67	1.89	0.37	0.21	0.23	0.2	0.23
ENSRNOG00000048750	AABR07047576.1	-	0.131	-2.92729	3.81173e-09	3.02394e-07	yes	down	0.67	2.52	1.28	0.79	0.11	0.12	0.19	0.19	0.17
ENSRNOG00000029205	Zfp354c	zinc finger protein 354C [Source:RGD Symbol;Acc:69405]	0.412	-1.27836	3.81423e-09	3.02394e-07	yes	down	4.81	4.75	5.59	5.51	2.25	2.73	2.57	3.21	2.42
ENSRNOG00000013055	Zfyve16	zinc finger FYVE-type containing 16 [Source:RGD Symbol;Acc:1564784]	0.412	-1.27829	4.01557e-09	3.15521e-07	yes	down	3.57	4.53	3.9	4.17	1.27	1.8	1.4	2.45	1.24
ENSRNOG00000012512	Nexn	nexilin (F actin binding protein) [Source:RGD Symbol;Acc:708354]	0.164	-2.61017	4.01701e-09	3.15521e-07	yes	down	7.03	3.82	5.75	6.56	0.37	0.34	1.11	0.6	0.79
ENSRNOG00000002969	Itpkb	inositol-trisphosphate 3-kinase B [Source:RGD Symbol;Acc:2932]	0.199	-2.32726	4.23822e-09	3.31362e-07	yes	down	7.49	15.88	12.09	11.12	2.76	3.86	9.68	13.53	3.89
ENSRNOG00000057979	AABR07011700.1	-	0.115	-3.11579	4.55234e-09	3.53299e-07	yes	down	3.92	11.39	7.21	4.67	0.22	1.05	0.95	0.87	0.52
ENSRNOG00000026466	Lrrtm3	leucine rich repeat transmembrane neuronal 3 [Source:RGD Symbol;Acc:1304866]	0.201	-2.31767	4.56045e-09	3.53299e-07	yes	down	3.42	51.59	15.04	2.73	1.25	1.09	0.52	0.89	0.53
ENSRNOG00000060718	AABR07064253.1	-	0.052	-4.2666	4.79022e-09	3.69413e-07	yes	down	1.18	2.54	1.17	1.29	0	0.16	0.12	0.09	0
ENSRNOG00000056721	Fancm	FA complementation group M [Source:RGD Symbol;Acc:1307897]	0.18	-2.47778	5.3556e-09	4.11145e-07	yes	down	13.97	16.24	21.77	9.31	3.94	2.45	2.97	3.64	1.1
ENSRNOG00000052798	AABR07072775.1	-	0.132	-2.91912	5.4538e-09	4.16798e-07	yes	down	17.56	27.71	32.92	27.49	5.43	2.33	2.92	6.06	0.53
ENSRNOG00000059387	AABR07067233.2	-	0.05	-4.30836	5.74453e-09	4.37048e-07	yes	down	0.96	1.09	0.77	0.39	0.1	0.06	0	0.05	0
ENSRNOG00000008704	Nlk	nemo like kinase [Source:RGD Symbol;Acc:1561602]	0.252	-1.99009	6.39513e-09	4.84374e-07	yes	down	4.79	7.08	3.65	3.88	1.69	1.17	1.3	7.3	0.52
ENSRNOG00000005486	Phf20l1	PHD finger protein 20-like 1 [Source:RGD Symbol;Acc:1560141]	0.28	-1.83548	6.46954e-09	4.87832e-07	yes	down	11.78	26.25	20.85	12.56	5.61	7.38	2.62	9.14	1.93
ENSRNOG00000045863	Naa16	N(alpha)-acetyltransferase 16, NatA auxiliary subunit [Source:RGD Symbol;Acc:1584324]	0.273	-1.87175	7.38723e-09	5.54566e-07	yes	down	3.75	4.28	4.21	3.93	1.3	0.54	1.04	1.72	0.73
ENSRNOG00000061564	AABR07031724.1	-	0.06	-4.06399	7.46628e-09	5.55976e-07	yes	down	3.01	8.71	7.42	3.39	0.52	0.04	0	0.71	0.36
ENSRNOG00000057806	Trpm7	transient receptor potential cation channel, subfamily M, member 7 [Source:RGD Symbol;Acc:620053]	0.35	-1.51611	7.47156e-09	5.55976e-07	yes	down	7.23	8.41	7.02	7.14	2.84	2.55	2.19	3.82	1.19
ENSRNOG00000062121	AABR07020663.2	-	0.082	-3.60409	7.64991e-09	5.65047e-07	yes	down	1.23	3.39	4.36	1.81	0.4	0.26	0.19	0.41	0
ENSRNOG00000046969	AABR07034438.1	-	0.194	-2.36721	7.66008e-09	5.65047e-07	yes	down	4.74	5.1	4.03	5.3	0.87	0.45	0.36	1.26	0.85
ENSRNOG00000060618	AABR07027267.1	-	0.079	-3.66142	7.70455e-09	5.65868e-07	yes	down	0.93	3.31	1.39	1.45	0.24	0.05	0.1	0.3	0.02
ENSRNOG00000005472	Sp4	Sp4 transcription factor [Source:RGD Symbol;Acc:3741]	0.149	-2.74272	8.00309e-09	5.85261e-07	yes	down	1.2	1.88	2.75	2.08	0.35	0.12	0.25	0.44	0.11
ENSRNOG00000004127	Cep170	centrosomal protein 170 [Source:RGD Symbol;Acc:621868]	0.308	-1.69683	8.73857e-09	6.36303e-07	yes	down	5.74	7.54	5.04	5.48	1.51	2.19	1.42	2.69	0.93
ENSRNOG00000012920	Col9a1	collagen type IX alpha 1 chain [Source:RGD Symbol;Acc:1309425]	0.165	-2.60285	9.30997e-09	6.75013e-07	yes	down	3.1	3.83	2.19	1.17	0.36	0.71	0.33	0.28	0.32
ENSRNOG00000053969	AABR07008681.1	-	0.078	-3.68926	1.00156e-08	7.23081e-07	yes	down	3.34	11.51	24.92	5.88	0.45	0.34	8.67	0.79	0
ENSRNOG00000061625	AABR07048698.1	-	0.021	-5.56392	1.02931e-08	7.39967e-07	yes	down	0.4	1.1	0.59	0.48	0	0.07	0	0	0
ENSRNOG00000035627	Mir325	microRNA 325 [Source:RGD Symbol;Acc:2325624]	0.088	-3.51016	1.09335e-08	7.82693e-07	yes	down	1.57	1.76	1.24	1.12	0.09	0.3	0.09	0.11	0
ENSRNOG00000033881	Insyn2a	inhibitory synaptic factor 2A [Source:RGD Symbol;Acc:2302685]	0.079	-3.66525	1.17049e-08	8.3439e-07	yes	down	0.96	2.07	1.02	0.95	0.14	0.01	0.18	0.06	0.03
ENSRNOG00000002051	Synj1	synaptojanin 1 [Source:RGD Symbol;Acc:69434]	0.399	-1.32383	1.1804e-08	8.37933e-07	yes	down	20.95	29.2	18.09	21.81	9.05	7.87	5.42	10.43	5.64
ENSRNOG00000002153	Cep135	centrosomal protein 135 [Source:RGD Symbol;Acc:1310726]	0.203	-2.30297	1.20159e-08	8.49427e-07	yes	down	3.65	5.59	4.79	3.12	1.24	0.58	0.23	1.43	0.74
ENSRNOG00000026236	Morc3	MORC family CW-type zinc finger 3 [Source:RGD Symbol;Acc:1307924]	0.36	-1.47486	1.23421e-08	8.68865e-07	yes	down	12.44	15.47	16.52	12.57	5.71	6.1	3.52	6.05	3.7
ENSRNOG00000053343	AC098459.2	-	0.077	-3.6942	1.24848e-08	8.74985e-07	yes	down	0.88	1.74	1.18	1.06	0.06	0	0.06	0.29	0.06
ENSRNOG00000061018	AABR07052529.1	-	0.393	-1.34834	1.25322e-08	8.74985e-07	yes	down	13.03	14.9	12.74	11.59	4.83	6.34	3.75	6.79	2.88
ENSRNOG00000047294	AABR07043115.1	-	0.113	-3.14904	1.28304e-08	8.92136e-07	yes	down	0.72	1.09	0.75	0.86	0.08	0.17	0.03	0.2	0.02
ENSRNOG00000011073	Htt	huntingtin [Source:RGD Symbol;Acc:68337]	0.301	-1.73265	1.35844e-08	9.40706e-07	yes	down	6.11	12.87	13.39	15.71	1.38	0.68	2.73	1.52	0.43
ENSRNOG00000007241	Fnbp4	formin binding protein 4 [Source:RGD Symbol;Acc:1309238]	0.253	-1.98424	1.39584e-08	9.62675e-07	yes	down	3.67	7.37	6.83	8.2	0.89	1.61	1.69	2.96	1.36
ENSRNOG00000002625	Ptpn4	protein tyrosine phosphatase, non-receptor type 4 [Source:RGD Symbol;Acc:620712]	0.208	-2.26362	1.42342e-08	9.7772e-07	yes	down	7.45	14.8	9.94	7.63	0.92	1.29	0.8	2.37	0.35
ENSRNOG00000056246	Gls	glutaminase [Source:RGD Symbol;Acc:2707]	0.285	-1.81292	1.44462e-08	9.88285e-07	yes	down	6.17	13.77	11.1	8.74	3.78	2.52	1.82	4.15	1.67
ENSRNOG00000057943	AABR07058884.2	-	0.217	-2.20542	1.46416e-08	9.97627e-07	yes	down	6.66	7.92	7.83	7.38	4.91	3.62	0.39	3.68	2.54
ENSRNOG00000016705	Prpf4b	pre-mRNA processing factor 4B [Source:RGD Symbol;Acc:1307784]	0.338	-1.56424	1.50853e-08	1.02375e-06	yes	down	9.32	14.8	11.66	12.83	4.86	5.12	4.96	6.36	2.45
ENSRNOG00000057463	AABR07008293.4	-	0.022	-5.50662	1.72627e-08	1.16685e-06	yes	down	2.41	2.06	2.81	2.22	0.2	0	0	0.1	0
ENSRNOG00000059041	AC141169.5	-	0.333	-1.58513	1.77686e-08	1.19628e-06	yes	down	7.38	8.54	7.35	6.73	2.83	3.12	3.44	5.62	3.97
ENSRNOG00000041744	AABR07065531.1	-	0.046	-4.4478	1.80717e-08	1.21188e-06	yes	down	1.61	3.57	1.97	0.79	0.04	0.22	0.04	0.1	0.04
ENSRNOG00000004947	Zfp871	zinc finger protein 871 [Source:MGI Symbol;Acc:MGI:1921793]	0.332	-1.59168	1.85603e-08	1.23974e-06	yes	down	7.74	8.97	7.44	8.38	1.96	0.97	1.03	3.25	0.66
ENSRNOG00000016998	Atxn1	ataxin 1 [Source:RGD Symbol;Acc:3624]	0.107	-3.22028	1.86366e-08	1.23996e-06	yes	down	24.86	12.43	55.42	4.13	0.52	4.53	0.22	10.65	0.18
ENSRNOG00000001730	Acap2	ArfGAP with coiled-coil, ankyrin repeat and PH domains 2 [Source:RGD Symbol;Acc:1562939]	0.298	-1.7455	1.90117e-08	1.25997e-06	yes	down	16.5	34.69	30.74	28.55	3.99	3.24	4.34	7.69	2.46
ENSRNOG00000012767	Micu3	mitochondrial calcium uptake family, member 3 [Source:RGD Symbol;Acc:1563411]	0.346	-1.5318	2.1032e-08	1.38844e-06	yes	down	7.65	14.15	10.48	9.51	2.31	3.21	2.23	5.33	2.19
ENSRNOG00000005513	Srsf5	serine and arginine rich splicing factor 5 [Source:RGD Symbol;Acc:3664]	0.384	-1.38145	2.28467e-08	1.50239e-06	yes	down	68.98	129.24	98.08	92.23	45.69	68.19	42.2	78.75	54.37
ENSRNOG00000003703	Mcm6	minichromosome maintenance complex component 6 [Source:RGD Symbol;Acc:61967]	3.799	1.92573	2.44041e-08	1.59861e-06	yes	up	0.94	1.66	1.02	1.42	3.33	5.82	2.28	5.04	6.23
ENSRNOG00000024142	Arglu1	arginine and glutamate rich 1 [Source:RGD Symbol;Acc:1310061]	0.393	-1.34831	2.59661e-08	1.69438e-06	yes	down	28.64	52.3	46.27	36.59	20.78	19.33	11.92	26.31	13.96
ENSRNOG00000006000	Cdk12	cyclin-dependent kinase 12 [Source:RGD Symbol;Acc:621111]	0.296	-1.75653	2.96522e-08	1.92751e-06	yes	down	2.42	3.56	2.69	2.25	0.93	0.49	0.9	1.1	0.5
ENSRNOG00000055631	Zfp280d	zinc finger protein 280D [Source:RGD Symbol;Acc:1560796]	0.219	-2.18821	3.00162e-08	1.94372e-06	yes	down	6.69	13.44	9.36	7.04	1.12	1.55	0.24	1.9	1.32
ENSRNOG00000032311	AABR07058658.1	-	0.11	-3.18021	3.14637e-08	2.02971e-06	yes	down	7.21	5.64	6.79	6.49	0.53	0.08	0.85	1.56	0.62
ENSRNOG00000057433	AABR07027581.1	-	0.203	-2.29861	3.23641e-08	2.07989e-06	yes	down	18.81	24.57	19.71	18.59	2.11	2.27	2.98	1.73	1.16
ENSRNOG00000051285	AABR07070312.1	-	0.112	-3.16308	3.60377e-08	2.30723e-06	yes	down	1.61	6.77	4.66	9.32	0.67	0.36	2	2.81	0.95
ENSRNOG00000015137	Spata6l	spermatogenesis associated 6-like [Source:RGD Symbol;Acc:1310039]	0.298	-1.74453	3.65545e-08	2.3304e-06	yes	down	5.04	6.34	7.55	6.34	1.62	2.56	2.23	2.22	1.52
ENSRNOG00000015158	Pikfyve	phosphoinositide kinase, FYVE-type zinc finger containing [Source:RGD Symbol;Acc:1592067]	0.37	-1.43405	3.66743e-08	2.3304e-06	yes	down	4.42	9.27	8.46	15.24	2.21	1.33	2.4	3.49	1.33
ENSRNOG00000006797	Zfp280c	zinc finger protein 280C [Source:RGD Symbol;Acc:1564669]	0.09	-3.47876	3.94583e-08	2.49795e-06	yes	down	2.63	6.07	4.62	3.19	0.38	0.86	0	0.71	0.25
ENSRNOG00000062277	AABR07036010.4	-	0.048	-4.38808	4.02293e-08	2.53729e-06	yes	down	1.66	4.49	4.08	2.28	0	0.36	0.06	0.26	0.06
ENSRNOG00000007937	Krit1	KRIT1, ankyrin repeat containing [Source:RGD Symbol;Acc:1305929]	0.341	-1.55285	4.08132e-08	2.56427e-06	yes	down	13.76	22.27	14.78	13.42	4.11	6.32	3.57	8.43	2.79
ENSRNOG00000010957	Braf	B-Raf proto-oncogene, serine/threonine kinase [Source:RGD Symbol;Acc:619908]	0.16	-2.64137	4.09594e-08	2.56427e-06	yes	down	5.73	12.17	8.98	6.18	0.98	0.86	0.32	3.13	0.33
ENSRNOG00000035500	Mirlet7c1	microRNA let-7c-1 [Source:RGD Symbol;Acc:2325435]	0.208	-2.26655	4.19518e-08	2.61674e-06	yes	down	3.04	5.23	6.93	3.18	0.78	1.06	1.2	0.65	0.42
ENSRNOG00000053064	AABR07004130.1	-	0.03	-5.07698	4.3083e-08	2.67746e-06	yes	down	2.29	10.67	5.6	4.01	0.14	0.41	0	0.32	0
ENSRNOG00000039721	AC123251.1	-	0.11	-3.18553	4.58821e-08	2.84101e-06	yes	down	4.57	9.75	4.9	4.34	0.28	0.38	0.39	1.66	0.51
ENSRNOG00000021681	Eea1	early endosome antigen 1 [Source:RGD Symbol;Acc:1310167]	0.331	-1.59528	4.73475e-08	2.92108e-06	yes	down	9.43	14.9	6.7	8.42	2.64	2.4	3.08	4.34	1.33
ENSRNOG00000033119	Plcb4	phospholipase C, beta 4 [Source:RGD Symbol;Acc:3345]	0.375	-1.41389	5.02831e-08	3.09095e-06	yes	down	5.47	9.34	5.71	7.56	1.97	2.27	0.93	2.03	1.36
ENSRNOG00000052255	AABR07034098.1	-	0.087	-3.51878	5.12377e-08	3.13826e-06	yes	down	1.34	2.75	1.78	1.66	0.24	0.32	0.07	0.14	0.05
ENSRNOG00000016645	Sfmbt1	Scm-like with four mbt domains 1 [Source:RGD Symbol;Acc:61999]	0.365	-1.45578	5.16427e-08	3.15169e-06	yes	down	9.9	16.62	11.34	11.43	3.1	2.84	2.1	5.61	1.98
ENSRNOG00000061348	Fam53b	family with sequence similarity 53, member B [Source:RGD Symbol;Acc:1310799]	0.162	-2.63037	5.19073e-08	3.15475e-06	yes	down	9.72	15.52	12.61	7.63	1.36	0.44	0.45	3.11	0.94
ENSRNOG00000022884	Cd84	CD84 molecule [Source:RGD Symbol;Acc:1564553]	0.213	-2.23389	5.20647e-08	3.15475e-06	yes	down	6.27	10.23	8.25	7.42	1.11	3.66	2.64	6.88	1.26
ENSRNOG00000008298	Dock7	dedicator of cytokinesis 7 [Source:RGD Symbol;Acc:1309790]	0.381	-1.39085	5.26501e-08	3.17887e-06	yes	down	31.28	43.78	46.63	28.54	11.49	8.72	12.39	14.63	6.2
ENSRNOG00000034007	Nr3c2	nuclear receptor subfamily 3, group C, member 2 [Source:RGD Symbol;Acc:3094]	0.133	-2.90946	5.34389e-08	3.21245e-06	yes	down	5.25	14.48	9.76	12.98	3.81	1.87	3.03	2.96	0.43
ENSRNOG00000007632	Mss51	MSS51 mitochondrial translational activator [Source:RGD Symbol;Acc:1309408]	0.119	-3.06641	5.3748e-08	3.21245e-06	yes	down	1.07	2.96	2.5	1.78	0.48	0.44	0.06	0.44	0.12
ENSRNOG00000002835	Luc7l3	LUC7-like 3 pre-mRNA splicing factor [Source:RGD Symbol;Acc:1307981]	0.266	-1.90895	5.37743e-08	3.21245e-06	yes	down	22.62	45.13	28.29	28.89	5.08	10.33	13.16	13.23	5.91
ENSRNOG00000025539	Vps13a	vacuolar protein sorting 13 homolog A [Source:RGD Symbol;Acc:1311340]	0.298	-1.7475	5.61194e-08	3.34078e-06	yes	down	1.84	3.43	2.87	2.64	0.72	0.66	0.84	1.25	0.36
ENSRNOG00000047574	Nrxn3	neurexin 3 [Source:RGD Symbol;Acc:620212]	0.06	-4.06526	5.7701e-08	3.42292e-06	yes	down	17.15	11.18	12.84	2.26	0.21	0.34	0	0.13	0.01
ENSRNOG00000050323	Srsf1	serine and arginine rich splicing factor 1 [Source:RGD Symbol;Acc:1587490]	0.488	-1.03589	5.81406e-08	3.43698e-06	yes	down	14.29	19.5	15.92	13.93	7.63	8.69	5.57	10.68	5.89
ENSRNOG00000056659	Mecp2	methyl CpG binding protein 2 [Source:RGD Symbol;Acc:3075]	0.218	-2.19903	6.4247e-08	3.78477e-06	yes	down	4.67	11.01	8.79	6.7	2.13	1.24	0.49	2.68	1.48
ENSRNOG00000008924	Arhgef12	Rho guanine nucleotide exchange factor 12 [Source:RGD Symbol;Acc:1305111]	0.258	-1.95644	6.59619e-08	3.87235e-06	yes	down	7.65	13.14	12.36	8.99	3.67	2.1	0.88	4.33	1.45
ENSRNOG00000020384	Fam13b	family with sequence similarity 13, member B [Source:RGD Symbol;Acc:1310484]	0.417	-1.26195	6.67207e-08	3.90339e-06	yes	down	11.35	14.99	14.52	14.59	6.65	5.74	3.71	8.68	3.47
ENSRNOG00000012045	Adgrb3	adhesion G protein-coupled receptor B3 [Source:RGD Symbol;Acc:1309703]	0.162	-2.62205	6.72865e-08	3.92296e-06	yes	down	5.55	20.45	10.82	4.51	2.68	1.97	2.46	3.25	1.21
ENSRNOG00000026408	Rnf169	ring finger protein 169 [Source:RGD Symbol;Acc:1583288]	0.12	-3.06245	7.33931e-08	4.26434e-06	yes	down	1.63	8.43	7.83	7.6	0.84	0.22	0.28	1	0.42
ENSRNOG00000029885	Stag2	stromal antigen 2 [Source:RGD Symbol;Acc:1562042]	0.391	-1.35558	7.48391e-08	4.31958e-06	yes	down	31.13	27.46	24.25	23.62	9.9	7.75	6.98	15.25	5.69
ENSRNOG00000057038	AABR07029803.1	-	0.03	-5.06948	7.4853e-08	4.31958e-06	yes	down	0.25	1.96	0.5	0.67	0	0.03	0	0.11	0
ENSRNOG00000002420	Zc3h7a	zinc finger CCCH type containing 7 A [Source:RGD Symbol;Acc:1311225]	0.347	-1.5259	7.67509e-08	4.41409e-06	yes	down	8.35	16.53	11.07	13.51	4.39	4.48	3.76	6.83	2.66
ENSRNOG00000031287	Cacna2d3	calcium voltage-gated channel auxiliary subunit alpha2delta 3 [Source:RGD Symbol;Acc:631361]	0.208	-2.26332	7.86271e-08	4.50672e-06	yes	down	7.44	20.7	14.75	8.53	4.07	2.76	5.59	2.77	2.01
ENSRNOG00000056458	Cep290	centrosomal protein 290 [Source:RGD Symbol;Acc:1311640]	0.211	-2.24168	8.16829e-08	4.6661e-06	yes	down	1.11	6.09	4.67	3.42	0.28	0.77	0.51	1.59	0.3
ENSRNOG00000009887	Arih1	ariadne RBR E3 ubiquitin protein ligase 1 [Source:RGD Symbol;Acc:1308131]	0.329	-1.60488	8.34048e-08	4.74848e-06	yes	down	5.92	10.32	9.17	8.1	2.43	2.02	1.19	4.11	1.11
ENSRNOG00000006378	Mga	MAX dimerization protein MGA [Source:RGD Symbol;Acc:1561597]	0.328	-1.60945	8.39684e-08	4.7542e-06	yes	down	1.36	1.99	1.72	1.79	0.62	0.5	0.45	0.92	0.24
ENSRNOG00000060742	AABR07029809.1	-	0.07	-3.84671	8.40658e-08	4.7542e-06	yes	down	0.73	1.47	0.78	0.36	0.11	0	0.02	0.12	0.03
ENSRNOG00000015553	Gatad2b	GATA zinc finger domain containing 2B [Source:RGD Symbol;Acc:1308533]	0.286	-1.80557	8.50408e-08	4.78929e-06	yes	down	12.71	20.19	16.47	14.91	5.89	2.07	5.55	5.77	4.69
ENSRNOG00000037462	Eml6	EMAP like 6 [Source:RGD Symbol;Acc:1561672]	0.147	-2.76893	8.52509e-08	4.78929e-06	yes	down	1.44	4.53	9.43	12.69	0.06	0.08	0.08	0.18	0.1
ENSRNOG00000002736	Rabgap1l	RAB GTPase activating protein 1-like [Source:RGD Symbol;Acc:1304620]	0.296	-1.75595	8.55516e-08	4.79032e-06	yes	down	5.43	9.39	5.28	5.48	2.29	1.72	0.71	3.01	1.22
ENSRNOG00000047748	AABR07038567.1	-	0.097	-3.3621	8.91135e-08	4.97335e-06	yes	down	4.29	10.14	5.01	5.7	0.9	0.75	0.32	1.19	0
ENSRNOG00000034037	Zfp266	zinc finger protein 266 [Source:RGD Symbol;Acc:1308643]	0.347	-1.52895	8.99069e-08	5.00118e-06	yes	down	3.82	6.87	5.84	4.12	1.92	1.36	1.66	2.52	1.07
ENSRNOG00000011317	Pkn2	protein kinase N2 [Source:RGD Symbol;Acc:620146]	0.433	-1.20904	9.13207e-08	5.06322e-06	yes	down	7.03	8.77	6.21	5.8	2.66	3.07	2.06	4.68	2.15
ENSRNOG00000004688	Rbfox2	RNA binding fox-1 homolog 2 [Source:RGD Symbol;Acc:1311838]	0.309	-1.69394	9.87526e-08	5.45745e-06	yes	down	10.17	7.53	7.31	9.54	2.34	4.73	0.8	2.85	3.28
ENSRNOG00000014999	Tnpo1	transportin 1 [Source:RGD Symbol;Acc:1308372]	0.424	-1.23884	1.00095e-07	5.51369e-06	yes	down	11.39	15.21	13.95	16.38	5.31	3.76	3.84	5.67	2.43
ENSRNOG00000017491	Carf	calcium responsive transcription factor [Source:RGD Symbol;Acc:1306822]	0.222	-2.16964	1.06684e-07	5.85762e-06	yes	down	1.78	1.81	2.04	1.57	0.36	0.39	0.44	0.59	0.11
ENSRNOG00000029178	Abcc5	ATP binding cassette subfamily C member 5 [Source:RGD Symbol;Acc:70913]	0.341	-1.55271	1.09335e-07	5.98377e-06	yes	down	10.25	31.59	11.55	14.86	7.84	10.02	6.79	7.83	6.58
ENSRNOG00000054639	AABR07062390.1	-	0.11	-3.17887	1.10052e-07	6.00366e-06	yes	down	2.22	8.9	8.51	6.3	0.97	0.85	0.71	0.83	0.07
ENSRNOG00000029956	AABR07033023.1	-	0.268	-1.89968	1.12591e-07	6.12247e-06	yes	down	2.18	2.43	1.83	1.41	0.73	0.88	0.19	0.86	0.24
ENSRNOG00000032048	Zfp462	zinc finger protein 462 [Source:RGD Symbol;Acc:1562123]	0.354	-1.49834	1.14051e-07	6.18205e-06	yes	down	1.5	1.83	2.14	1.95	0.62	0.47	0.62	1	0.45
ENSRNOG00000035546	Mir421	microRNA 421 [Source:RGD Symbol;Acc:2325538]	0.05	-4.31267	1.1558e-07	6.22902e-06	yes	down	2.7	3.03	2.37	2	0.08	0.31	0	0.18	0.07
ENSRNOG00000020514	Sox6	SRY-box transcription factor 6 [Source:RGD Symbol;Acc:1309000]	0.289	-1.79218	1.15651e-07	6.22902e-06	yes	down	20.62	52.18	28.63	20.33	8.06	10.07	6.03	17.65	7.54
ENSRNOG00000030625	Tf	transferrin [Source:RGD Symbol;Acc:3845]	2.691	1.42814	1.25375e-07	6.73139e-06	yes	up	2818.98	3853.56	2487.9	3252.19	5125.14	9150.97	9282.82	10090.1	5320.28
ENSRNOG00000056327	AABR07002010.1	-	0.192	-2.38213	1.28348e-07	6.86862e-06	yes	down	2.83	2.93	4.07	1.79	0.49	0.74	0.87	0.68	0.5
ENSRNOG00000049128	Nktr	natural killer cell triggering receptor [Source:RGD Symbol;Acc:2321593]	0.317	-1.65633	1.28741e-07	6.86862e-06	yes	down	4.52	6.03	3.82	3.47	1.04	1.43	1.42	2.2	0.67
ENSRNOG00000019671	Rsbn1	round spermatid basic protein 1 [Source:RGD Symbol;Acc:1307231]	0.331	-1.59581	1.29166e-07	6.86967e-06	yes	down	2.44	2.52	2.26	1.96	0.92	0.57	0.61	1.2	0.4
ENSRNOG00000058461	Sfpq	splicing factor proline and glutamine rich [Source:RGD Symbol;Acc:727923]	0.422	-1.24475	1.30318e-07	6.9093e-06	yes	down	8.24	11.27	9.6	8.94	8.9	6.48	3.59	8.36	4.52
ENSRNOG00000058973	Atad2b	ATPase family, AAA domain containing 2B [Source:RGD Symbol;Acc:1566199]	0.272	-1.87969	1.39408e-07	7.3682e-06	yes	down	2.16	5.19	2.82	2.1	0.73	0.83	0.98	1.51	0.45
ENSRNOG00000005043	Cpeb2	cytoplasmic polyadenylation element binding protein 2 [Source:RGD Symbol;Acc:1307485]	0.299	-1.73947	1.44447e-07	7.61083e-06	yes	down	22.23	46.08	47.35	40.59	9.47	3.27	11.18	8.07	3.42
ENSRNOG00000052547	LOC103694082	uncharacterized LOC103694082 [Source:RGD Symbol;Acc:9406128]	0.058	-4.10824	1.45742e-07	7.65527e-06	yes	down	0.4	1.3	1.12	0.56	0.1	0.06	0	0.1	0
ENSRNOG00000030048	AABR07038355.1	-	0.154	-2.70279	1.46541e-07	7.67348e-06	yes	down	2.09	4.24	4.62	1.89	0.33	0.21	0.57	0.81	0.36
ENSRNOG00000048921	AABR07053613.1	-	0.128	-2.97034	1.50113e-07	7.83638e-06	yes	down	2.78	7.47	4.41	5.65	0.43	0.25	1.09	0.66	0.46
ENSRNOG00000059400	AABR07070796.1	-	0.047	-4.4261	1.52754e-07	7.94976e-06	yes	down	2.04	6.67	2.36	3.09	0	0	0.31	0.38	0.05
ENSRNOG00000060832	AC240408.2	-	0.096	-3.37867	1.55039e-07	8.04403e-06	yes	down	3.46	5.87	5.28	2.78	0.29	0.38	0.68	0.63	0
ENSRNOG00000004496	Rock2	Rho-associated coiled-coil containing protein kinase 2 [Source:RGD Symbol;Acc:3590]	0.381	-1.39032	1.5576e-07	8.05679e-06	yes	down	11.57	13.93	8.12	11.09	2.99	4.55	3.46	6.18	2.24
ENSRNOG00000010526	Dennd1a	DENN domain containing 1A [Source:RGD Symbol;Acc:1307927]	0.339	-1.56249	1.57827e-07	8.13888e-06	yes	down	15.66	33.32	30.17	22.93	3.53	2.79	3.93	7.09	2.3
ENSRNOG00000012961	AABR07067882.1	-	25.549	4.6752	1.60072e-07	8.22962e-06	yes	up	0.86	0	0	0.23	2.99	4.65	8.26	6.07	6.86
ENSRNOG00000014455	LOC499136	LRRGT00021 [Source:RGD Symbol;Acc:1559542]	0.009	-6.72801	1.74077e-07	8.92264e-06	yes	down	1.63	2.07	3.19	3.13	0	0	0	0	0
ENSRNOG00000046774	AABR07045307.1	-	0.068	-3.88119	1.75402e-07	8.96347e-06	yes	down	3.7	3.83	3.69	1.73	0.17	0.13	0.11	0.78	0
ENSRNOG00000001854	Tmtc1	transmembrane O-mannosyltransferase targeting cadherins 1 [Source:RGD Symbol;Acc:1564868]	0.394	-1.34515	1.78663e-07	9.10268e-06	yes	down	8.25	14.5	7.26	15.92	3.09	2.43	4.65	2.14	1.94
ENSRNOG00000010084	Ythdf3	YTH N(6)-methyladenosine RNA binding protein 3 [Source:RGD Symbol;Acc:1305234]	0.381	-1.39252	1.92948e-07	9.80107e-06	yes	down	12.94	21.4	15.31	14.14	6.94	4.29	5.88	6.88	3.32
ENSRNOG00000057744	AC112355.1	-	0.092	-3.44793	1.98071e-07	1.00313e-05	yes	down	0.89	1.77	1.18	0.94	0.11	0.12	0	0.33	0.03
ENSRNOG00000005115	Asf1b	anti-silencing function 1B histone chaperone [Source:RGD Symbol;Acc:1304918]	5.294	2.40431	2.1386e-07	1.07987e-05	yes	up	0.97	2.54	2.39	5.59	3.23	9.52	10.25	5.98	11.99
ENSRNOG00000004564	Lrriq1	leucine-rich repeats and IQ motif containing 1 [Source:RGD Symbol;Acc:1564903]	0.194	-2.36848	2.15311e-07	1.08396e-05	yes	down	4.75	11.23	11.47	4.88	0.6	1.55	2.75	2.21	0.76
ENSRNOG00000059468	AABR07034573.3	-	0.064	-3.95733	2.16579e-07	1.08712e-05	yes	down	0.82	1.35	0.59	0.79	0	0.08	0	0.05	0.14
ENSRNOG00000006833	Rb1cc1	RB1-inducible coiled-coil 1 [Source:RGD Symbol;Acc:1309346]	0.348	-1.5213	2.25294e-07	1.12753e-05	yes	down	8.33	12.01	7.45	8.07	1.83	3.37	2.39	5.51	1.81
ENSRNOG00000039902	Lbh	LBH regulator of WNT signaling pathway [Source:RGD Symbol;Acc:1584525]	0.214	-2.22482	2.26006e-07	1.12777e-05	yes	down	11.85	11.25	11.87	13.61	14.09	3.02	5.28	9.95	5.87
ENSRNOG00000058475	AABR07033285.1	-	0.034	-4.86995	2.30134e-07	1.145e-05	yes	down	2.15	8.64	4.05	2.3	0	0.61	0	0.13	0
ENSRNOG00000058555	7SK	7SK RNA [Source:RFAM;Acc:RF00100]	0.294	-1.76652	2.38449e-07	1.17945e-05	yes	down	212.79	130.59	171.68	167.59	87.21	34.44	40.01	49.6	29.38
ENSRNOG00000008734	Zmym2	zinc finger MYM-type containing 2 [Source:RGD Symbol;Acc:1593255]	0.4	-1.32312	2.40731e-07	1.18728e-05	yes	down	5.19	10.36	8.28	4.39	2.2	1.93	1.39	3.56	1.3
ENSRNOG00000000043	Idua	alpha-L-iduronidase [Source:RGD Symbol;Acc:1310943]	0.426	-1.23243	2.4213e-07	1.19072e-05	yes	down	15.03	22.05	20.07	23.8	9.36	6.92	5.19	14.81	7.25
ENSRNOG00000061389	AABR07058233.2	-	0.107	-3.22064	2.44743e-07	1.20009e-05	yes	down	1.27	1.27	1.16	1	0	0.13	0.06	0.35	0.11
ENSRNOG00000006649	Thrb	thyroid hormone receptor beta [Source:RGD Symbol;Acc:3858]	0.295	-1.76252	2.47259e-07	1.20893e-05	yes	down	10.9	17.62	8.57	7.02	1.9	1.88	0.55	3.49	1.2
ENSRNOG00000061869	AABR07035012.1	-	0.059	-4.08889	2.48301e-07	1.21054e-05	yes	down	0.24	0.87	0.36	0.36	0.04	0.04	0.01	0.05	0
ENSRNOG00000023541	Ahctf1	AT hook containing transcription factor 1 [Source:RGD Symbol;Acc:1561291]	0.319	-1.64749	2.50439e-07	1.21622e-05	yes	down	3.7	9.47	6.94	3.53	0.91	0.48	0.7	1.56	0.7
ENSRNOG00000005196	Slc12a6	solute carrier family 12, member 6 [Source:RGD Symbol;Acc:1311335]	0.292	-1.77696	2.50901e-07	1.21622e-05	yes	down	12.08	16.06	12.67	9.81	4.47	2.63	1.16	2.62	0.87
ENSRNOG00000000053	Crp	C-reactive protein [Source:RGD Symbol;Acc:2411]	0.046	-4.43102	2.58696e-07	1.25044e-05	yes	down	0.41	1.89	7.35	0.37	0.09	0.02	0.04	0.15	0
ENSRNOG00000001916	Tmprss15	transmembrane serine protease 15 [Source:RGD Symbol;Acc:1311046]	0.018	-5.79643	2.95711e-07	1.42529e-05	yes	down	21.12	45.12	11.25	19.45	0	0.27	0.63	1.46	0
ENSRNOG00000055836	AABR07000402.1	-	0.048	-4.37967	3.03418e-07	1.4583e-05	yes	down	1829.08	238.38	947.78	451.51	72.85	8.79	24.91	44.45	4.36
ENSRNOG00000058050	Bclaf1	BCL2-associated transcription factor 1 [Source:RGD Symbol;Acc:1309704]	0.494	-1.01638	3.09389e-07	1.48279e-05	yes	down	19.18	22.26	18.38	20.13	7.49	10.06	6.56	13.25	7.79
ENSRNOG00000047241	AABR07052125.2	-	0.08	-3.64418	3.25392e-07	1.5551e-05	yes	down	2.28	8.2	4.17	3.39	0.12	0	0.55	0.52	0.37
ENSRNOG00000053635	Zkscan8	zinc finger with KRAB and SCAN domains 8 [Source:RGD Symbol;Acc:1308983]	0.238	-2.07134	3.26614e-07	1.55655e-05	yes	down	5.45	1.79	1.75	1.08	0.2	0.37	0.51	0.42	0.17
ENSRNOG00000013967	Blnk	B-cell linker [Source:RGD Symbol;Acc:1561933]	2.433	1.28275	3.32947e-07	1.58229e-05	yes	up	7.95	9.18	10.11	7.98	11.14	18.31	18.88	16.63	22.07
ENSRNOG00000016744	Chd6	chromodomain helicase DNA binding protein 6 [Source:RGD Symbol;Acc:1310465]	0.318	-1.65457	3.4371e-07	1.62888e-05	yes	down	9.55	11.32	7.81	10.96	5.44	2.76	3.47	6.53	2.47
ENSRNOG00000013281	Mib1	mindbomb E3 ubiquitin protein ligase 1 [Source:RGD Symbol;Acc:1307195]	0.254	-1.97615	3.48519e-07	1.64707e-05	yes	down	10.31	21.17	27.55	13.91	3.46	2.89	2.84	5.32	0.89
ENSRNOG00000053036	AC123427.1	-	0.102	-3.29459	3.54939e-07	1.67275e-05	yes	down	3.27	6.71	3.95	2.14	0.2	0.37	0.63	0.62	0.03
ENSRNOG00000011636	Dennd6a	DENN domain containing 6A [Source:RGD Symbol;Acc:1306064]	0.48	-1.05905	3.60821e-07	1.69576e-05	yes	down	30.24	36.25	31.46	30.27	22.55	19.1	18.07	26.57	15.52
ENSRNOG00000017493	Pias2	protein inhibitor of activated STAT, 2 [Source:RGD Symbol;Acc:71056]	0.471	-1.08689	3.62427e-07	1.6986e-05	yes	down	17.41	19.91	23.96	20.82	11.3	15.67	12.78	16.45	11.1
ENSRNOG00000056397	SNORD22	Small nucleolar RNA SNORD22 [Source:RFAM;Acc:RF00099]	0.339	-1.56133	3.63929e-07	1.70094e-05	yes	down	22.37	13.32	19.3	15.65	4.8	6.3	6.56	5.86	4.5
ENSRNOG00000048644	AC115371.1	-	0.101	-3.31308	3.68183e-07	1.7161e-05	yes	down	6.05	6.26	11.91	4.71	0.02	0.47	0.61	3.65	0.6
ENSRNOG00000030478	AY172581.9	-	0.411	-1.28203	3.75744e-07	1.74654e-05	yes	down	3520.2	2666.64	2544.62	3095.36	1711.5	901.94	1052.96	1161.83	896.32
ENSRNOG00000002904	Arr3	arrestin 3 [Source:RGD Symbol;Acc:621385]	0.029	-5.09602	3.84007e-07	1.78007e-05	yes	down	0.56	0.74	2.61	1.54	0.04	0.08	0	0	0.06
ENSRNOG00000046455	LOC100911224	zinc finger protein interacting with ribonucleoprotein K-like [Source:RGD Symbol;Acc:6494420]	0.118	-3.08845	3.87106e-07	1.78955e-05	yes	down	5.61	3.8	2.78	1.69	0.9	0.78	3.1	2.45	1.22
ENSRNOG00000012088	LOC100364265	ribosomal protein L19-like [Source:RGD Symbol;Acc:2321393]	0.147	-2.76619	3.89494e-07	1.79569e-05	yes	down	2	3.88	2.66	2.4	0.21	0.16	0.41	1	0.19
ENSRNOG00000004061	Pnn	pinin, desmosome associated protein [Source:RGD Symbol;Acc:1597086]	0.364	-1.45796	3.90662e-07	1.7962e-05	yes	down	13.33	23.67	14.29	12.28	5.4	5.98	5.94	6.81	3.04
ENSRNOG00000002541	Pds5a	PDS5 cohesin associated factor A [Source:RGD Symbol;Acc:1307094]	0.436	-1.19671	4.03622e-07	1.85077e-05	yes	down	5.5	5.46	4.95	5.67	2.33	2.75	2.28	2.8	1.27
ENSRNOG00000005927	Cpsf6	cleavage and polyadenylation specific factor 6 [Source:RGD Symbol;Acc:1304640]	0.436	-1.19849	4.10418e-07	1.87686e-05	yes	down	8.63	16.43	12.28	9.27	3.7	5.02	4.05	6.03	4.11
ENSRNOG00000002376	Clasp1	cytoplasmic linker associated protein 1 [Source:RGD Symbol;Acc:1310970]	0.225	-2.15094	4.32333e-07	1.97176e-05	yes	down	11.81	17.76	17.79	13.86	4.96	9.38	2.65	4.06	0.5
ENSRNOG00000052847	AABR07025673.1	-	0.085	-3.55261	4.44208e-07	2.02049e-05	yes	down	0.33	1.02	0.52	0.41	0.1	0.04	0.03	0.06	0
ENSRNOG00000047386	Smg1	SMG1, nonsense mediated mRNA decay associated PI3K related kinase [Source:RGD Symbol;Acc:1563508]	0.308	-1.70111	4.47375e-07	2.02946e-05	yes	down	5.03	9.71	5.26	2.68	1.2	1.42	3.07	2.79	1.8
ENSRNOG00000012629	Rab23	RAB23, member RAS oncogene family [Source:RGD Symbol;Acc:1306867]	0.366	-1.44969	4.59867e-07	2.08056e-05	yes	down	6.6	11.89	10.09	17.32	2.91	2.95	1.52	3.61	1.41
ENSRNOG00000020295	Plekhn1	pleckstrin homology domain containing N1 [Source:RGD Symbol;Acc:1311019]	0.08	-3.64501	4.70987e-07	2.1252e-05	yes	down	0.34	1.31	1.38	1.23	0.14	0.06	0	0.19	0.05
ENSRNOG00000034287	AABR07035916.1	autism susceptibility 2 protein-like [Source:NCBI gene;Acc:103691310]	0.106	-3.24347	4.78745e-07	2.15448e-05	yes	down	1.38	3.35	2.38	2.98	0.69	0.29	0	0.47	0.08
ENSRNOG00000004351	Slc25a29	solute carrier family 25 member 29 [Source:RGD Symbol;Acc:1308104]	2.625	1.39207	4.99031e-07	2.23983e-05	yes	up	9.15	7.21	8.03	10.38	13.42	25.81	24.08	23.32	20.01
ENSRNOG00000018960	AABR07001382.1	spectrin repeat containing nuclear envelope protein 1 [Source:NCBI gene;Acc:499010]	0.304	-1.71897	5.10281e-07	2.28428e-05	yes	down	26.72	39.72	35.01	23.06	3.77	5.02	3.29	11.15	2.78
ENSRNOG00000053203	Mical3	microtubule associated monooxygenase, calponin and LIM domain containing 3 [Source:RGD Symbol;Acc:1359504]	0.323	-1.62969	5.17429e-07	2.31018e-05	yes	down	8.85	23.54	12.6	13.07	4.68	3.17	4.97	6.52	2.57
ENSRNOG00000056984	Baz2b	bromodomain adjacent to zinc finger domain, 2B [Source:RGD Symbol;Acc:1309801]	0.318	-1.65371	5.20377e-07	2.31725e-05	yes	down	12.33	26.41	16.73	11.66	3.34	4.62	6.45	6.7	2.61
ENSRNOG00000055579	Tmbim6	transmembrane BAX inhibitor motif containing 6 [Source:RGD Symbol;Acc:3842]	2.27	1.18241	5.37274e-07	2.38623e-05	yes	up	272.88	287.38	252.21	335	469.42	642.22	891.82	604.95	743.02
ENSRNOG00000047765	AABR07010682.1	-	0.025	-5.33944	5.41275e-07	2.39772e-05	yes	down	0.27	1.38	0.42	0.58	0	0	0.06	0	0
ENSRNOG00000062158	AC134224.3	-	0.17	-2.55521	5.74615e-07	2.53878e-05	yes	down	3234.9	5565.81	6904.23	3205.05	207.1	710.86	1371.28	1181.95	235.86
ENSRNOG00000015133	Kmt2a	lysine methyltransferase 2A [Source:RGD Symbol;Acc:1586165]	0.342	-1.54968	5.78661e-07	2.55002e-05	yes	down	3.58	5.03	4.76	4.34	1.83	0.84	1.38	2.6	1.11
ENSRNOG00000004415	Togaram1	TOG array regulator of axonemal microtubules 1 [Source:RGD Symbol;Acc:1310474]	0.216	-2.20832	5.81486e-07	2.55583e-05	yes	down	5.48	9.27	9.85	8.76	1.66	1.11	3.36	2.2	0.43
ENSRNOG00000052018	AABR07052441.1	-	0.045	-4.46245	5.93659e-07	2.60259e-05	yes	down	1.64	7.44	1.9	1.09	0.05	0.03	0.16	0.74	0
ENSRNOG00000053110	AABR07045047.1	-	0.035	-4.83068	5.95742e-07	2.60499e-05	yes	down	1.01	2.55	2.15	1.45	0	0	0.15	0.07	0.05
ENSRNOG00000021497	Akt3	AKT serine/threonine kinase 3 [Source:RGD Symbol;Acc:62390]	0.27	-1.88939	6.00602e-07	2.61949e-05	yes	down	11.41	25.87	25.15	16.65	2.83	1.77	1.96	2.69	0.69
ENSRNOG00000051170	Ddx17	DEAD-box helicase 17 [Source:RGD Symbol;Acc:1304945]	0.33	-1.59928	6.14714e-07	2.67416e-05	yes	down	18.58	21.14	18.37	17.15	9.59	7	6.11	8.22	5.85
ENSRNOG00000020769	Crebrf	CREB3 regulatory factor [Source:RGD Symbol;Acc:1310862]	0.418	-1.25895	6.22238e-07	2.69914e-05	yes	down	20.47	24.72	25.34	20.37	8.36	9.83	10.63	14.69	5.62
ENSRNOG00000053934	AC109837.1	-	0.074	-3.75449	6.23638e-07	2.69914e-05	yes	down	1	1.75	1.19	0.87	0	0.18	0.09	0.19	0
ENSRNOG00000059252	AABR07057108.1	-	0.116	-3.10333	6.55813e-07	2.83117e-05	yes	down	0.57	0.86	0.6	0.46	0.08	0.06	0.03	0.19	0.01
ENSRNOG00000051780	AC129234.1	-	0.196	-2.35401	6.60173e-07	2.84276e-05	yes	down	1.79	1.35	1.04	1.73	0.45	0.53	0.14	0.14	0.14
ENSRNOG00000026579	AC119332.1	-	0.087	-3.52485	7.03875e-07	3.02328e-05	yes	down	1.53	2.18	2.82	5.65	5.27	31.75	0.11	0.19	0
ENSRNOG00000038275	Adam4	a disintegrin and metalloprotease domain 4 [Source:RGD Symbol;Acc:621470]	0.029	-5.09986	7.06078e-07	3.02508e-05	yes	down	0.65	0.81	0.6	0.76	0.07	0	0	0.03	0
ENSRNOG00000015508	Relch	RAB11 binding and LisH domain, coiled-coil and HEAT repeat containing [Source:RGD Symbol;Acc:1307235]	0.348	-1.52379	7.07936e-07	3.0254e-05	yes	down	3.77	6.26	4.59	4.89	1.9	1.07	1.59	2.55	0.89
ENSRNOG00000056248	Marf1	meiosis regulator and mRNA stability factor 1 [Source:RGD Symbol;Acc:619770]	0.458	-1.12541	7.22543e-07	3.07784e-05	yes	down	3.3	4.28	4.27	3.61	1.77	1.48	1.36	2.67	1.29
ENSRNOG00000006238	Traf2	Tnf receptor-associated factor 2 [Source:RGD Symbol;Acc:1310457]	2.509	1.3269	7.23836e-07	3.07784e-05	yes	up	7.11	11.18	6.47	11.82	17.76	23.43	20.09	19.64	22.78
ENSRNOG00000014509	Sacs	sacsin molecular chaperone [Source:RGD Symbol;Acc:1307281]	0.22	-2.18435	7.28754e-07	3.09101e-05	yes	down	1.49	3.14	3.25	3.31	1.14	0.13	0.2	0.26	0.07
ENSRNOG00000048042	AABR07034729.2	-	0.009	-6.71884	7.55083e-07	3.1947e-05	yes	down	0.15	0.11	0.45	0.14	0	0	0	0	0
ENSRNOG00000016636	Lpin3	lipin 3 [Source:RGD Symbol;Acc:1588534]	0.148	-2.75968	7.63353e-07	3.22166e-05	yes	down	0.79	3.8	1.75	3.3	0.57	0.14	0.54	0.93	0.18
ENSRNOG00000005371	Klhl29	kelch-like family member 29 [Source:RGD Symbol;Acc:1311076]	0.167	-2.58036	7.86363e-07	3.31053e-05	yes	down	6.09	12.7	17.04	19.05	1.63	2.23	0.42	0.63	3.41
ENSRNOG00000004925	Ppp1r12a	protein phosphatase 1, regulatory subunit 12A [Source:RGD Symbol;Acc:620013]	0.466	-1.10111	7.97431e-07	3.34881e-05	yes	down	12.28	16.51	13.74	11.55	7	9.38	7.54	9.9	5.78
ENSRNOG00000029220	Zmym5	zinc finger MYM-type containing 5 [Source:RGD Symbol;Acc:1306353]	0.44	-1.18542	8.14465e-07	3.4119e-05	yes	down	7.01	11.48	8.61	8.82	3.61	5.03	4.17	8.31	3.47
ENSRNOG00000010999	Cep295	centrosomal protein 295 [Source:RGD Symbol;Acc:1311723]	0.224	-2.1609	8.23845e-07	3.4427e-05	yes	down	4.17	12.14	7.18	6.94	0.23	2.93	0.16	0.91	0.32
ENSRNOG00000005903	St14	suppression of tumorigenicity 14 [Source:RGD Symbol;Acc:69288]	3.407	1.76863	8.26538e-07	3.44546e-05	yes	up	4.76	2.2	2.44	3.56	7.47	7.41	9.59	7.21	9.99
ENSRNOG00000060144	Ankle2	ankyrin repeat and LEM domain containing 2 [Source:RGD Symbol;Acc:1310191]	0.424	-1.23745	8.30852e-07	3.45496e-05	yes	down	14.39	18.85	17	16.48	8.24	6.82	7.43	10.1	4.08
ENSRNOG00000005802	Usp24	ubiquitin specific peptidase 24 [Source:RGD Symbol;Acc:1306799]	0.385	-1.37881	8.36249e-07	3.4689e-05	yes	down	8.17	10.2	11.47	7.38	3.05	2.12	4.19	3.37	2.7
ENSRNOG00000043388	Irf3	interferon regulatory factor 3 [Source:RGD Symbol;Acc:1549774]	0.393	-1.34731	8.63413e-07	3.57284e-05	yes	down	17.85	33.96	25.06	28.54	9.82	9.25	12.09	12.02	13.3
ENSRNOG00000056478	AABR07001807.1	-	0.066	-3.92554	8.69629e-07	3.58981e-05	yes	down	0.32	0.64	0.43	0.56	0.07	0.05	0	0.03	0
ENSRNOG00000019062	Pura	purine rich element binding protein A [Source:RGD Symbol;Acc:1308543]	0.346	-1.53252	8.72039e-07	3.59102e-05	yes	down	43.62	62.89	56.43	45.61	24.82	17.3	13.69	35.41	8.15
ENSRNOG00000010680	Med12l	mediator complex subunit 12-like [Source:RGD Symbol;Acc:1592212]	0.218	-2.19665	9.22942e-07	3.79144e-05	yes	down	2.53	5.74	11.98	3.68	0.49	1.79	1.62	1.35	0.48
ENSRNOG00000050801	AABR07000629.3	-	0.105	-3.25052	9.43419e-07	3.8662e-05	yes	down	0.43	0.97	0.76	0.34	0.09	0.09	0	0.11	0.04
ENSRNOG00000043866	AY172581.24	-	0.401	-1.31768	9.55453e-07	3.90608e-05	yes	down	26642.6	23544.3	19878.3	23228.8	14406.7	9204.81	4196.88	10924.3	6963.3
ENSRNOG00000014336	Mcm5	minichromosome maintenance complex component 5 [Source:RGD Symbol;Acc:1306616]	4.925	2.30021	9.61109e-07	3.91975e-05	yes	up	1.02	1.21	0.26	0.68	3.45	5.07	0.99	5.75	3.89
ENSRNOG00000014399	Aamp	angio-associated, migratory cell protein [Source:RGD Symbol;Acc:1306281]	2.197	1.13564	1.01629e-06	4.13485e-05	yes	up	77.41	66.18	63.15	87.93	122.49	167.95	123.96	141.7	172.19
ENSRNOG00000011480	Tubgcp5	tubulin, gamma complex associated protein 5 [Source:RGD Symbol;Acc:1304689]	0.481	-1.05684	1.02196e-06	4.14798e-05	yes	down	6.77	9.49	7.45	6.83	4.2	3.25	2.72	3.91	2.61
ENSRNOG00000004459	Sdr9c7	short chain dehydrogenase/reductase family 9C, member 7 [Source:RGD Symbol;Acc:628716]	0.147	-2.76512	1.0525e-06	4.26175e-05	yes	down	0.96	1.69	1.29	1.4	0.16	0.12	0.04	0.46	0.21
ENSRNOG00000014275	AABR07026291.1	-	0.368	-1.44247	1.05628e-06	4.26688e-05	yes	down	19.94	22.03	16.24	8.78	5.96	4.75	4.87	7.48	3.68
ENSRNOG00000018378	Cacnb2	calcium voltage-gated channel auxiliary subunit beta 2 [Source:RGD Symbol;Acc:67385]	0.094	-3.40833	1.06099e-06	4.27571e-05	yes	down	6.04	6.42	7.47	8.91	0.42	0.42	0	1.6	0.25
ENSRNOG00000019358	Esr1	estrogen receptor 1 [Source:RGD Symbol;Acc:2581]	0.15	-2.73418	1.0825e-06	4.35205e-05	yes	down	53.26	32.04	45.01	29.2	7.96	6.31	2.84	5.96	2.78
ENSRNOG00000024336	Senp6	SUMO specific peptidase 6 [Source:RGD Symbol;Acc:1304565]	0.47	-1.08965	1.10668e-06	4.43876e-05	yes	down	16.06	20.39	15.74	17.63	6.77	9.28	4.43	11.78	4.91
ENSRNOG00000055092	AABR07015966.1	-	0.06	-4.05559	1.12538e-06	4.50212e-05	yes	down	5.35	14.74	16.5	9.47	1.34	0.67	0	1	0
ENSRNOG00000048411	Uhrf1	ubiquitin-like with PHD and ring finger domains 1 [Source:RGD Symbol;Acc:1595855]	5.93	2.56793	1.12779e-06	4.50212e-05	yes	up	0.08	0.38	0.11	0.32	0.85	1.67	0.57	1.89	1.28
ENSRNOG00000056428	AABR07044962.1	RAN binding protein 2 [Source:NCBI gene;Acc:294429]	0.017	-5.8658	1.14383e-06	4.55191e-05	yes	down	0.97	0.59	1.15	0.43	0	0	0	0.04	0.03
ENSRNOG00000002852	Myo19	myosin XIX [Source:RGD Symbol;Acc:1559961]	0.158	-2.66113	1.14562e-06	4.55191e-05	yes	down	4.32	2.1	7.52	1.25	0.6	0.36	0.65	0.48	0.08
ENSRNOG00000045844	Impact	impact RWD domain protein [Source:RGD Symbol;Acc:1591977]	0.351	-1.5121	1.17809e-06	4.66996e-05	yes	down	19.35	30.4	28.63	19.87	7.52	9.63	6.51	15.46	3.77
ENSRNOG00000009135	LOC500007	similar to EF hand calcium binding domain 1 [Source:RGD Symbol;Acc:1588445]	0.091	-3.46123	1.20396e-06	4.7614e-05	yes	down	0.45	1.13	1.53	0.59	0.02	0.11	0.06	0.15	0.06
ENSRNOG00000002473	Odr4	odr-4 GPCR localization factor homolog [Source:RGD Symbol;Acc:1307830]	0.441	-1.18042	1.22539e-06	4.83486e-05	yes	down	13.29	12.51	13.73	11.48	7.01	9.43	8.33	9.44	6.05
ENSRNOG00000047884	AABR07001923.1	-	0.157	-2.6742	1.27876e-06	5.02469e-05	yes	down	0.84	3.47	7.61	2.55	0.24	1.06	0.27	3	0.06
ENSRNOG00000049662	Zfp708	zinc finger protein 708 [Source:MGI Symbol;Acc:MGI:3040674]	0.26	-1.94326	1.27942e-06	5.02469e-05	yes	down	1.58	2.67	3.76	1.62	0.63	0.6	0.41	1.44	0.46
ENSRNOG00000014486	Rfx3	regulatory factor X3 [Source:RGD Symbol;Acc:1307779]	0.321	-1.64078	1.30634e-06	5.11267e-05	yes	down	3.8	7.42	8.03	6.05	1.79	1.75	1.29	3.74	1.22
ENSRNOG00000019697	Ankrd28	ankyrin repeat domain 28 [Source:RGD Symbol;Acc:1559931]	0.362	-1.46713	1.30785e-06	5.11267e-05	yes	down	15.63	28.01	23.23	15.03	5.1	2.93	4.01	7.39	2.31
ENSRNOG00000043436	Micu1	mitochondrial calcium uptake 1 [Source:RGD Symbol;Acc:735033]	2.078	1.05499	1.33522e-06	5.19574e-05	yes	up	65.5	60.87	74.31	80.97	101.52	184.98	113.3	174.82	126.37
ENSRNOG00000009957	Slc25a13	solute carrier family 25 member 13 [Source:RGD Symbol;Acc:1565889]	0.264	-1.92375	1.37111e-06	5.32318e-05	yes	down	7.75	14.12	15.75	9.01	3.06	2.88	2.91	9.01	3.23
ENSRNOG00000037080	Adamts17	ADAM metallopeptidase with thrombospondin type 1 motif, 17 [Source:RGD Symbol;Acc:1308783]	0.095	-3.3924	1.42345e-06	5.51375e-05	yes	down	5.49	11.6	12.2	3.98	0.17	0.03	0	0.16	0.05
ENSRNOG00000034233	Fyttd1	forty-two-three domain containing 1 [Source:RGD Symbol;Acc:1306899]	0.441	-1.18058	1.44392e-06	5.57746e-05	yes	down	26.1	39.53	28.45	22.65	17.45	16.98	11.61	24.49	11.02
ENSRNOG00000022343	Alms1	ALMS1, centrosome and basal body associated protein [Source:RGD Symbol;Acc:1311590]	0.239	-2.06325	1.44647e-06	5.57746e-05	yes	down	8.3	11.53	9.93	9.61	2.55	1.15	0.93	6.15	0.95
ENSRNOG00000000500	Scube3	signal peptide, CUB domain and EGF like domain containing 3 [Source:RGD Symbol;Acc:1304880]	0.145	-2.78631	1.4681e-06	5.64801e-05	yes	down	0.65	1.78	2.54	2.16	0.29	0.23	0.04	0.56	0.21
ENSRNOG00000031033	Mt-nd2	mitochondrially encoded NADH dehydrogenase 2 [Source:RGD Symbol;Acc:620556]	0.394	-1.34381	1.47564e-06	5.66419e-05	yes	down	2786.76	3687.84	2095.59	2792.14	1533.26	915.29	818.38	1611.35	545.89
ENSRNOG00000051922	AABR07059663.1	-	0.417	-1.2616	1.52638e-06	5.84573e-05	yes	down	15.47	43	18.91	20.64	9.86	4.4	5.62	5.59	5.1
ENSRNOG00000058277	AC080157.1	-	0.081	-3.62674	1.54963e-06	5.92142e-05	yes	down	2.67	3.32	2.57	3.32	0	0.55	0.33	0.32	0
ENSRNOG00000036964	Ralgapa2	Ral GTPase activating protein catalytic alpha subunit 2 [Source:RGD Symbol;Acc:1308023]	0.044	-4.50738	1.57317e-06	5.99785e-05	yes	down	2.2	10.33	6.87	0.46	0.08	0.16	0	0.04	0
ENSRNOG00000047531	Ccdc57	coiled-coil domain containing 57 [Source:RGD Symbol;Acc:1590047]	0.291	-1.78238	1.5975e-06	6.07697e-05	yes	down	2.67	11.8	11.29	6.32	1.78	0.72	4.4	0.99	1.15
ENSRNOG00000030580	LOC317588	hypothetical protein LOC317588 [Source:RGD Symbol;Acc:1565204]	0.268	-1.8978	1.61658e-06	6.11111e-05	yes	down	14.55	31.77	18.49	16.8	6.29	15.27	25.65	9.97	14.68
ENSRNOG00000002682	Zfp692	zinc finger protein 692 [Source:RGD Symbol;Acc:1306740]	0.319	-1.65063	1.6171e-06	6.11111e-05	yes	down	4.48	8.36	4.82	5.82	1.62	1.62	1.36	3.75	2.29
ENSRNOG00000058166	AABR07057495.1	-	0.224	-2.15733	1.62008e-06	6.11111e-05	yes	down	4.29	3.36	1.88	2.38	1.68	0.24	0.58	1.77	0.24
ENSRNOG00000050134	LOC108348293	uncharacterized LOC108348293 [Source:RGD Symbol;Acc:11360501]	0.211	-2.24449	1.62089e-06	6.11111e-05	yes	down	10.62	39.2	20.9	39.63	14.98	11.28	8.62	2.42	18.31
ENSRNOG00000005730	Pcmtd1	protein-L-isoaspartate (D-aspartate) O-methyltransferase domain containing 1 [Source:RGD Symbol;Acc:1586096]	0.396	-1.33824	1.68414e-06	6.33551e-05	yes	down	20	24.35	15.19	17.39	5.59	7.82	5.73	13.9	4.14
ENSRNOG00000014482	Slf2	SMC5-SMC6 complex localization factor 2 [Source:RGD Symbol;Acc:1560300]	0.37	-1.43619	1.75403e-06	6.58382e-05	yes	down	5.58	5.63	5.04	5.28	2.39	2.23	0.94	3.35	0.96
ENSRNOG00000059308	AABR07047750.2	-	0.029	-5.12413	1.7914e-06	6.70925e-05	yes	down	7.93	22.44	14.3	9.25	0.43	0	1.13	0	0
ENSRNOG00000023257	Adamts9	ADAM metallopeptidase with thrombospondin type 1 motif, 9 [Source:RGD Symbol;Acc:1306889]	0.334	-1.58362	1.83732e-06	6.86606e-05	yes	down	6.93	14.9	18.74	13.66	3.75	4.41	6.91	8.65	3.05
ENSRNOG00000058408	AC108588.1	-	0.04	-4.63003	1.94497e-06	7.23648e-05	yes	down	0.21	0.84	0.37	0.38	0.06	0	0.02	0	0
ENSRNOG00000046469	Zfp300	zinc finger protein 300 [Source:RGD Symbol;Acc:2321626]	0.194	-2.36542	2.02018e-06	7.49987e-05	yes	down	2.1	4.54	2.11	1.94	0.4	0.35	0.36	1.11	0.07
ENSRNOG00000003399	Hnrnph1	heterogeneous nuclear ribonucleoprotein H1 [Source:RGD Symbol;Acc:620840]	0.489	-1.03354	2.08111e-06	7.7092e-05	yes	down	39.74	56	43.68	37.6	16.99	19.03	19.86	27.59	17.83
ENSRNOG00000047780	AABR07046635.1	-	0.065	-3.94253	2.12455e-06	7.85296e-05	yes	down	8.4	21.16	2.73	1.84	0	5.5	0	0.18	0.09
ENSRNOG00000046662	Ints6l	integrator complex subunit 6 like [Source:RGD Symbol;Acc:1592872]	0.194	-2.36528	2.13341e-06	7.86858e-05	yes	down	3.49	9.89	5.3	5.41	0.74	0.4	1.38	1.23	1.52
ENSRNOG00000005391	Prex2	phosphatidylinositol-3,4,5-trisphosphate-dependent Rac exchange factor 2 [Source:RGD Symbol;Acc:1307865]	0.315	-1.66636	2.23954e-06	8.24209e-05	yes	down	23.47	39.24	29.52	24.82	9.01	6.35	5.35	11.61	2.04
ENSRNOG00000013412	Creb1	cAMP responsive element binding protein 1 [Source:RGD Symbol;Acc:620218]	0.443	-1.17561	2.25178e-06	8.26919e-05	yes	down	6.99	4.31	4.17	3.7	2.64	2.93	2.97	3.5	2.93
ENSRNOG00000060587	AABR07002627.1	-	12.546	3.64915	2.26123e-06	8.28598e-05	yes	up	0	0	4.56	1.01	3.69	12.86	5.25	5.07	8.26
ENSRNOG00000047145	LOC102551340	zinc finger protein 728-like [Source:RGD Symbol;Acc:7697243]	0.375	-1.41449	2.27022e-06	8.30096e-05	yes	down	16.74	14.23	12.16	15.24	13.34	7.12	2.74	6.97	7.68
ENSRNOG00000007350	Rac2	Rac family small GTPase 2 [Source:RGD Symbol;Acc:1307568]	2.719	1.44303	2.28354e-06	8.33173e-05	yes	up	15.88	14.44	19.4	16.72	32.75	39.41	28.03	43.49	68.34
ENSRNOG00000002753	Adam11	ADAM metallopeptidase domain 11 [Source:RGD Symbol;Acc:1307515]	0.222	-2.1694	2.30969e-06	8.40344e-05	yes	down	2.63	5.01	3.6	4.01	1.15	0.16	0.7	1.29	1.04
ENSRNOG00000056739	AABR07036336.2	-	0.099	-3.34012	2.3131e-06	8.40344e-05	yes	down	0.67	1.67	2.13	1.23	0.32	0	0.05	0.21	0.11
ENSRNOG00000003554	Piga	phosphatidylinositol glycan anchor biosynthesis, class A [Source:RGD Symbol;Acc:1589723]	0.191	-2.39128	2.42437e-06	8.78885e-05	yes	down	4.43	12.39	5.37	4.06	2	0.99	0.36	3.63	0.69
ENSRNOG00000012772	Nqo1	NAD(P)H quinone dehydrogenase 1 [Source:RGD Symbol;Acc:2503]	2.495	1.31886	2.44182e-06	8.83323e-05	yes	up	44.76	54.05	70.25	66.24	83.89	153.06	158.36	161.87	129.33
ENSRNOG00000008039	Cul5	cullin 5 [Source:RGD Symbol;Acc:621742]	0.446	-1.16403	2.45803e-06	8.87298e-05	yes	down	11.25	16.96	13.57	11.09	5.18	6.82	4.23	8.48	3.56
ENSRNOG00000022871	LOC691170	similar to zinc finger protein 84 (HPF2) [Source:RGD Symbol;Acc:1587418]	0.413	-1.27702	2.48713e-06	8.95564e-05	yes	down	2.41	3.41	2.93	2.3	0.79	1.2	0.84	1.67	1.09
ENSRNOG00000015692	Taok1	TAO kinase 1 [Source:RGD Symbol;Acc:708455]	0.401	-1.31715	2.49149e-06	8.95564e-05	yes	down	17.79	24.68	22.82	17.51	6.76	7.43	7.33	14.19	3.81
ENSRNOG00000032735	Srek1	splicing regulatory glutamic acid and lysine rich protein 1 [Source:RGD Symbol;Acc:621696]	0.397	-1.33159	2.54214e-06	9.11837e-05	yes	down	6.07	9.89	6.76	5.34	2.77	4.94	4.83	5.04	2.6
ENSRNOG00000014004	Ncoa7	nuclear receptor coactivator 7 [Source:RGD Symbol;Acc:1566426]	0.386	-1.3726	2.62648e-06	9.40103e-05	yes	down	7.91	6.49	7.59	4.39	2.58	2.74	1.96	3.16	1.54
ENSRNOG00000020150	Il18bp	interleukin 18 binding protein [Source:RGD Symbol;Acc:620042]	3.463	1.79189	2.63657e-06	9.41728e-05	yes	up	13.07	9.41	10.62	16.96	29.79	36.06	31.48	27.24	72.05
ENSRNOG00000024703	Dock5	dedicator of cytokinesis 5 [Source:RGD Symbol;Acc:1306872]	0.299	-1.74037	2.64365e-06	9.42274e-05	yes	down	3.44	3.85	2.38	5.07	1.47	0.7	0.97	1.74	0.51
ENSRNOG00000024272	Ino80d	INO80 complex subunit D [Source:RGD Symbol;Acc:1304808]	0.264	-1.92402	2.66318e-06	9.46111e-05	yes	down	7.71	11.38	8.87	7.59	2.56	1.48	3.31	3.86	1.25
ENSRNOG00000015734	Ube3a	ubiquitin protein ligase E3A [Source:RGD Symbol;Acc:1306361]	0.401	-1.3184	2.66557e-06	9.46111e-05	yes	down	18.58	33.3	21.55	16.24	6.28	6.76	7.57	12.86	4.19
ENSRNOG00000056907	Nipbl	NIPBL, cohesin loading factor [Source:RGD Symbol;Acc:1306393]	0.432	-1.21097	2.68816e-06	9.50154e-05	yes	down	5.06	7.33	4.2	4.74	2.08	2.58	1.99	4.13	1.62
ENSRNOG00000001108	N4bp2l2	NEDD4 binding protein 2-like 2 [Source:RGD Symbol;Acc:1359603]	0.492	-1.02274	2.72363e-06	9.60124e-05	yes	down	15.68	25.66	18.83	17.46	10.08	12.43	6.43	12.11	8.03
ENSRNOG00000056636	LOC108352627	uncharacterized LOC108352627 [Source:RGD Symbol;Acc:11405975]	0.24	-2.05921	2.73256e-06	9.60124e-05	yes	down	0.93	1.78	1.06	0.91	0.19	0.2	0.44	0.3	0.41
ENSRNOG00000042536	Pde4d	phosphodiesterase 4D [Source:RGD Symbol;Acc:3281]	0.336	-1.57203	2.73335e-06	9.60124e-05	yes	down	15.96	66.99	19.21	28.48	4.66	7.14	2.47	2.71	2.32
ENSRNOG00000002024	Epha5	EPH receptor A5 [Source:RGD Symbol;Acc:620831]	0.036	-4.78822	2.79827e-06	9.80899e-05	yes	down	5.29	0.79	3.17	0.13	0	0	0.03	0.01	0
ENSRNOG00000010427	Ipo7	importin 7 [Source:RGD Symbol;Acc:1310849]	0.36	-1.47585	2.89052e-06	0.000101115	yes	down	5.33	5.66	3.6	5.95	1.81	1.24	1.97	2.51	0.87
ENSRNOG00000014434	Chd1	chromodomain helicase DNA binding protein 1 [Source:RGD Symbol;Acc:1306794]	0.418	-1.25961	2.89751e-06	0.00010115	yes	down	5.2	4.86	3.74	4.59	1.63	2.31	0.83	2.66	1.33
ENSRNOG00000051889	Usp34	ubiquitin specific peptidase 34 [Source:RGD Symbol;Acc:1565181]	0.344	-1.54105	2.91336e-06	0.000101495	yes	down	3.58	6.21	4.04	5.27	0.73	1.38	0.6	1.92	0.4
ENSRNOG00000011739	Dennd4a	DENN domain containing 4A [Source:RGD Symbol;Acc:1562639]	0.409	-1.28965	3.07909e-06	0.000107049	yes	down	5	7.55	6.02	6.7	3.66	2.49	1.87	2.73	1.31
ENSRNOG00000004521	Prpf39	pre-mRNA processing factor 39 [Source:RGD Symbol;Acc:1308702]	0.344	-1.53881	3.1247e-06	0.000108412	yes	down	6.18	11.85	7.4	6.38	1.44	3.48	1.51	4.61	2.38
ENSRNOG00000054753	AABR07000986.1	-	0.046	-4.44541	3.13131e-06	0.00010842	yes	down	0.51	0.95	0.69	0.5	0	0	0.07	0.07	0
ENSRNOG00000005209	Spred1	sprouty-related, EVH1 domain containing 1 [Source:RGD Symbol;Acc:1308735]	0.26	-1.94379	3.23977e-06	0.000111947	yes	down	6.61	12.08	12.84	8.26	3.95	7.28	2.61	6.62	1.17
ENSRNOG00000030700	Mt-co3	mitochondrially encoded cytochrome c oxidase III [Source:RGD Symbol;Acc:621873]	0.315	-1.66788	3.26496e-06	0.000112588	yes	down	28159.8	28367.2	23595.6	25524.2	15756.6	5565.07	3335.85	12401.5	4376.03
ENSRNOG00000057667	AC124874.2	-	0.063	-3.98091	3.32138e-06	0.000114301	yes	down	11.14	15.78	9.9	11.38	0.26	0	0.99	1.41	0.55
ENSRNOG00000042195	Pabpn1	poly(A) binding protein, nuclear 1 [Source:RGD Symbol;Acc:619928]	0.415	-1.27014	3.37715e-06	0.000115887	yes	down	44.01	63.9	46.93	40.52	21.14	28	9.71	33.19	22.41
ENSRNOG00000051152	LOC102549817	zinc finger protein 124-like [Source:RGD Symbol;Acc:7645610]	0.248	-2.00882	3.38113e-06	0.000115887	yes	down	10.89	13.79	10.34	8.78	1.63	2.47	1.38	1.94	3.44
ENSRNOG00000046420	AABR07006458.1	-	0.046	-4.44944	3.44516e-06	0.000117844	yes	down	1.05	2.45	2.48	1.24	0	0.09	0	0.39	0
ENSRNOG00000000275	Fam13c	family with sequence similarity 13, member C [Source:RGD Symbol;Acc:1310149]	0.346	-1.53191	3.47675e-06	0.000118685	yes	down	799.31	750.83	488.7	447.03	265.75	108.82	202.63	266.88	113.8
ENSRNOG00000055480	AABR07044668.1	-	0.102	-3.29673	3.5476e-06	0.000120861	yes	down	7.81	19	15.15	6.49	2.66	1.44	0	1.79	0.18
ENSRNOG00000061718	AABR07066871.3	-	0.02	-5.62893	3.57386e-06	0.000121268	yes	down	1.09	2.07	2.03	1.19	0	0.07	0.07	0	0
ENSRNOG00000013920	Arhgap26	Rho GTPase activating protein 26 [Source:RGD Symbol;Acc:1310923]	0.33	-1.59856	3.67765e-06	0.000124541	yes	down	2.54	4.03	3.26	4.43	2.02	2.98	0.77	1.76	2.07
ENSRNOG00000053518	Zscan26	zinc finger and SCAN domain containing 26 [Source:RGD Symbol;Acc:727885]	0.335	-1.57963	3.68515e-06	0.000124546	yes	down	10.5	16.26	10.39	10.51	4.35	2.32	3.75	6.04	2.16
ENSRNOG00000052721	Kdm6a	lysine demethylase 6A [Source:RGD Symbol;Acc:9275041]	0.367	-1.44624	3.73174e-06	0.00012587	yes	down	6.47	12.47	9.69	9.07	4.57	2.15	3	4.73	2.07
ENSRNOG00000061998	AABR07044421.1	-	4.221	2.07745	3.74056e-06	0.000125917	yes	up	34.91	32.23	18.84	41.62	68.88	143.47	63.72	74.22	230.76
ENSRNOG00000022999	Ppp2r3a	protein phosphatase 2, regulatory subunit B'', alpha [Source:RGD Symbol;Acc:1306958]	0.347	-1.52689	3.86887e-06	0.000129722	yes	down	7.91	13.37	12.84	9.27	3.53	2.89	2.15	6.09	1.42
ENSRNOG00000011655	Dcaf10	DDB1 and CUL4 associated factor 10 [Source:RGD Symbol;Acc:1304730]	0.338	-1.56629	3.95135e-06	0.000132226	yes	down	2.12	3.55	2.8	1.52	1.01	0.73	0.74	0.99	0.43
ENSRNOG00000009491	Phc3	polyhomeotic homolog 3 [Source:RGD Symbol;Acc:1307998]	0.37	-1.43346	3.97016e-06	0.000132594	yes	down	15.25	23.19	17.91	16.23	4.83	4.81	3.17	11.29	2.94
ENSRNOG00000024414	Ate1	arginyltransferase 1 [Source:RGD Symbol;Acc:1309335]	0.491	-1.02563	4.05423e-06	0.000135136	yes	down	22.79	33	26.53	25.02	13.33	12.48	15.17	18.15	8.83
ENSRNOG00000015334	Fcho2	FCH and mu domain containing endocytic adaptor 2 [Source:RGD Symbol;Acc:1565396]	0.399	-1.32405	4.46659e-06	0.000148588	yes	down	9.16	12.41	9.33	7.91	4.14	4.05	3.8	5.64	1.94
ENSRNOG00000051014	AABR07016418.1	-	0.048	-4.3864	4.49177e-06	0.000149134	yes	down	10.96	22.29	20.12	16.02	3.16	0	0.78	0	0
ENSRNOG00000011059	Ttbk2	tau tubulin kinase 2 [Source:RGD Symbol;Acc:1311661]	0.324	-1.6268	4.69676e-06	0.000154951	yes	down	3.52	4.22	7.16	9.72	0.64	3.59	3.17	1.26	3.94
ENSRNOG00000031216	AABR07055776.1	-	0.309	-1.69333	4.71125e-06	0.000154951	yes	down	7.65	14.77	8.09	8.67	1.19	4.06	2.67	4.49	2.07
ENSRNOG00000000648	Jmjd1c	jumonji domain containing 1C [Source:RGD Symbol;Acc:708458]	0.408	-1.29235	4.71264e-06	0.000154951	yes	down	9.82	14.91	12.23	10.63	4.86	4.88	2.97	7.71	2.08
ENSRNOG00000047085	Lrrtm2	leucine rich repeat transmembrane neuronal 2 [Source:RGD Symbol;Acc:1593785]	0.331	-1.59296	4.77142e-06	0.00015658	yes	down	1.9	3.86	3.44	1.57	0.93	0.89	0.78	1.12	0.55
ENSRNOG00000015686	Cert1	ceramide transporter 1 [Source:RGD Symbol;Acc:1309131]	0.405	-1.30344	4.95293e-06	0.000162223	yes	down	5.48	7.98	8.95	7.89	2.38	1.76	1.33	1.92	0.99
ENSRNOG00000017864	Bdp1	B double prime 1, subunit of RNA polymerase III transcription initiation factor IIIB [Source:RGD Symbol;Acc:1308512]	0.38	-1.39676	5.05249e-06	0.000165069	yes	down	4.86	6.3	4.06	4.26	1.89	3.62	1.22	2.49	1.12
ENSRNOG00000008841	Orc1	origin recognition complex, subunit 1 [Source:RGD Symbol;Acc:631435]	0.315	-1.66541	5.05929e-06	0.000165069	yes	down	2.67	4.71	5.58	5.43	2.93	3.05	2.4	2.21	2.3
ENSRNOG00000061225	AABR07060364.1	-	0.038	-4.72509	5.0857e-06	0.000165612	yes	down	0.89	3.1	1.52	1.73	0.12	0	0.19	0	0
ENSRNOG00000006645	Ryr3	ryanodine receptor 3 [Source:RGD Symbol;Acc:68952]	0.167	-2.57967	5.14266e-06	0.000167146	yes	down	4.8	7.84	12.92	10	0.03	0.03	0.03	0.2	0.08
ENSRNOG00000052778	AABR07024381.1	-	0.095	-3.40135	5.22391e-06	0.000169462	yes	down	0.7	2.71	1.98	1.72	0.44	0.08	0	0.1	0.18
ENSRNOG00000002126	Ncam2	neural cell adhesion molecule 2 [Source:RGD Symbol;Acc:1303131]	0.34	-1.55428	5.33029e-06	0.000172335	yes	down	12.12	23.2	12.71	8.01	5.09	5.82	3.72	8.02	2.06
ENSRNOG00000013624	Uevld	UEV and lactate/malate dehyrogenase domains [Source:RGD Symbol;Acc:1587416]	0.237	-2.07472	5.33279e-06	0.000172335	yes	down	4.54	5.6	4.4	3.7	0.44	0.86	0.73	2.19	0.29
ENSRNOG00000052840	Tanc2	tetratricopeptide repeat, ankyrin repeat and coiled-coil containing 2 [Source:RGD Symbol;Acc:1309285]	0.392	-1.34965	5.39748e-06	0.000174094	yes	down	30.26	20.49	17.17	7.38	4.95	4.95	2.78	4.01	2.69
ENSRNOG00000030294	Eml4	EMAP like 4 [Source:RGD Symbol;Acc:1304690]	0.402	-1.31538	5.44292e-06	0.00017494	yes	down	5.46	6.62	4.29	5.77	2.12	1.63	1.71	2.5	1.79
ENSRNOG00000023985	Fan1	FANCD2 and FANCI associated nuclease 1 [Source:RGD Symbol;Acc:1566323]	0.34	-1.55515	5.44433e-06	0.00017494	yes	down	2	5.61	2.93	3.84	0.61	1.22	0.61	1.15	0.6
ENSRNOG00000017505	Npepo	aminopeptidase O [Source:RGD Symbol;Acc:1309592]	0.434	-1.20443	5.5821e-06	0.000179028	yes	down	24.44	36.18	39.04	30.13	16.41	27.08	22.92	16.71	19.81
ENSRNOG00000050174	AABR07049535.1	-	0.056	-4.15674	5.72022e-06	0.000183112	yes	down	1.23	2.13	2.32	4.33	0.19	0	0.25	0.11	0.08
ENSRNOG00000061603	Asxl1	ASXL transcriptional regulator 1 [Source:RGD Symbol;Acc:1561878]	0.455	-1.13535	5.75953e-06	0.000184023	yes	down	10.91	11.16	9.73	10.53	5.14	3.24	2.6	5.21	2.01
ENSRNOG00000015519	Ces1d	carboxylesterase 1D [Source:RGD Symbol;Acc:70896]	0.107	-3.22286	5.81509e-06	0.000185291	yes	down	6.11	1.2	1.87	1.57	0.1	0.11	0.26	0.21	0.66
ENSRNOG00000031092	Rock1	Rho-associated coiled-coil containing protein kinase 1 [Source:RGD Symbol;Acc:620424]	0.39	-1.35822	5.82107e-06	0.000185291	yes	down	12.6	17.24	10.98	9.18	2.8	4.95	4.5	6.76	2.46
ENSRNOG00000043006	Epm2aip1	EPM2A interacting protein 1 [Source:RGD Symbol;Acc:1310977]	0.38	-1.3948	5.83199e-06	0.000185291	yes	down	15.11	18.57	18.09	15.76	9.06	5.41	3.64	10.71	3.65
ENSRNOG00000046305	LOC103690114	zinc finger protein 383-like [Source:RGD Symbol;Acc:9160828]	0.374	-1.42031	5.9615e-06	0.000189052	yes	down	6.42	6.82	4.17	4.96	2.97	3.11	1.14	1.73	1.98
ENSRNOG00000019875	Matr3	matrin 3 [Source:RGD Symbol;Acc:3052]	0.427	-1.22617	6.15672e-06	0.000194879	yes	down	47.52	66.57	66.03	37.12	16.29	39.75	19.64	38.54	21.66
ENSRNOG00000037207	Ubr1	ubiquitin protein ligase E3 component n-recognin 1 [Source:RGD Symbol;Acc:1562326]	0.419	-1.25631	6.25836e-06	0.000197727	yes	down	4.06	5.14	4.13	5.17	2.47	1.37	1.62	3.01	1.01
ENSRNOG00000049988	Mbtd1	mbt domain containing 1 [Source:RGD Symbol;Acc:1592427]	0.381	-1.39129	6.37708e-06	0.000201103	yes	down	2.31	4.04	2.43	2.28	1.08	1.21	0.49	1.66	0.74
ENSRNOG00000012207	Dst	dystonin [Source:RGD Symbol;Acc:1306566]	0.379	-1.39783	6.45297e-06	0.000203119	yes	down	49.06	81.96	61.5	54.9	23.55	23.02	30.44	43.79	13.28
ENSRNOG00000012046	Prmt5	protein arginine methyltransferase 5 [Source:RGD Symbol;Acc:1309053]	2.206	1.1417	6.47844e-06	0.000203543	yes	up	9.84	10.46	6.29	10.12	18.09	21.55	19.32	16.1	18.18
ENSRNOG00000032925	AC118414.1	-	0.427	-1.22795	6.52727e-06	0.000204698	yes	down	95.72	105.7	104.05	82.87	44.61	45.05	34.43	48.27	27.09
ENSRNOG00000008455	Tmem87a	transmembrane protein 87A [Source:RGD Symbol;Acc:1309417]	0.475	-1.07471	6.54153e-06	0.000204767	yes	down	12.55	18.57	15.74	14.77	8.76	6.69	5.1	10.18	4.92
ENSRNOG00000030131	AABR07031494.1	-	0.373	-1.42245	6.58171e-06	0.000205645	yes	down	2.64	4.27	3.18	2.28	0.8	1.47	0.69	2	0.89
ENSRNOG00000008479	Slc8a1	solute carrier family 8 member A1 [Source:RGD Symbol;Acc:3717]	0.355	-1.49324	6.71151e-06	0.000209315	yes	down	3.68	6.18	7.02	4.84	1.53	0.95	1.65	2.09	0.95
ENSRNOG00000006684	Zfp317	zinc finger protein 317 [Source:RGD Symbol;Acc:1565419]	0.397	-1.33221	6.74134e-06	0.00020986	yes	down	5.11	8.34	10.26	5.28	2.14	4.63	1.66	4.52	1.7
ENSRNOG00000017508	Kmt5c	lysine methyltransferase 5C [Source:RGD Symbol;Acc:1305226]	0.351	-1.50902	6.91588e-06	0.000214899	yes	down	3.4	7.46	4.13	6.11	2.09	1.29	1.68	2.37	2.59
ENSRNOG00000010137	Xpo4	exportin 4 [Source:RGD Symbol;Acc:1312015]	0.43	-1.21891	6.95558e-06	0.000215738	yes	down	4.12	8.78	7.58	11.44	1.62	3.26	10.13	5.29	3.15
ENSRNOG00000013865	Zmym6	zinc finger MYM-type containing 6 [Source:RGD Symbol;Acc:1561833]	0.301	-1.73216	6.98349e-06	0.000216208	yes	down	2.84	6.26	5.18	3.58	1.3	0.96	1.45	2.44	0.67
ENSRNOG00000011294	Usp33	ubiquitin specific peptidase 33 [Source:RGD Symbol;Acc:1307848]	0.356	-1.48888	7.03955e-06	0.000217547	yes	down	8.22	13.34	9.5	8.62	3.98	3.49	3.58	4.64	1.23
ENSRNOG00000024056	Zfp17	zinc finger protein 585B [Source:RGD Symbol;Acc:1624201]	0.331	-1.59318	7.0963e-06	0.000218902	yes	down	1.71	3.91	2.4	3.28	1.02	0.78	0.7	1.65	0.4
ENSRNOG00000042269	Gpr21	G protein-coupled receptor 21 [Source:RGD Symbol;Acc:1586383]	0.015	-6.05551	7.29942e-06	0.000224759	yes	down	0.17	0.53	0.25	1.06	0	0	0	0.03	0
ENSRNOG00000007644	Mbtps2	membrane-bound transcription factor peptidase, site 2 [Source:RGD Symbol;Acc:1566171]	0.382	-1.38817	7.36276e-06	0.000226298	yes	down	5.24	9.97	11.92	7.28	2.49	2.18	2.3	3.09	2.19
ENSRNOG00000002054	Glmn	glomulin, FKBP associated protein [Source:RGD Symbol;Acc:1588600]	0.457	-1.13121	7.47851e-06	0.00022944	yes	down	7.81	12.54	8.16	8.16	4.05	6.36	5.32	5.59	4.67
ENSRNOG00000010397	Agbl3	ATP/GTP binding protein-like 3 [Source:RGD Symbol;Acc:1561995]	0.259	-1.94878	7.66078e-06	0.000234608	yes	down	1.43	3.26	3.18	2.31	1.45	0.8	1.75	0.68	0.67
ENSRNOG00000027191	Birc6	baculoviral IAP repeat-containing 6 [Source:RGD Symbol;Acc:1307247]	0.337	-1.56878	7.85091e-06	0.000239997	yes	down	16.83	46.25	24.24	44.3	30.28	33.8	30.97	27.08	19.91
ENSRNOG00000036592	Zfp518a	zinc finger protein 518A [Source:RGD Symbol;Acc:1305314]	0.282	-1.82736	7.89868e-06	0.000241023	yes	down	0.93	1.8	1.26	1.58	0.39	0.19	0.45	0.63	0.19
ENSRNOG00000050697	Ctsz	cathepsin Z [Source:RGD Symbol;Acc:708479]	2.886	1.52902	7.93261e-06	0.000241624	yes	up	102.66	83.83	88.9	148.88	189.02	224	350.52	228.39	382.86
ENSRNOG00000028566	Pld4	phospholipase D family, member 4 [Source:RGD Symbol;Acc:1598308]	3.115	1.63911	7.95859e-06	0.000241981	yes	up	28.58	21.87	29.43	42.85	43.35	75.18	119.85	84	112.2
ENSRNOG00000005021	Orc4	origin recognition complex, subunit 4 [Source:RGD Symbol;Acc:735212]	0.458	-1.12711	8.1389e-06	0.000247021	yes	down	8.16	13.35	9.82	7.22	5.97	3.84	4.49	6.39	4.89
ENSRNOG00000058285	Nme8	NME/NM23 family member 8 [Source:RGD Symbol;Acc:735069]	0.068	-3.86938	8.33187e-06	0.000252426	yes	down	11.79	32.92	19.02	12.05	0	0.78	2.49	2.1	0
ENSRNOG00000046647	Impad1	inositol monophosphatase domain containing 1 [Source:RGD Symbol;Acc:1306455]	0.441	-1.18134	8.45177e-06	0.000255099	yes	down	16.52	20.27	16.41	16.66	9.12	5.2	6.43	12.1	4.34
ENSRNOG00000018153	Rbm5	RNA binding motif protein 5 [Source:RGD Symbol;Acc:1305059]	0.469	-1.09202	8.46435e-06	0.000255099	yes	down	26.72	45.79	35.69	31.59	16.76	26.72	16.27	22.14	12.86
ENSRNOG00000058500	LOC103694908	low affinity immunoglobulin gamma Fc region receptor III-like [Source:RGD Symbol;Acc:9277665]	104.15	6.70252	8.4652e-06	0.000255099	yes	up	0	0	0	0	0.17	0.52	4.33	1.07	3.16
ENSRNOG00000009324	Wdr54	WD repeat domain 54 [Source:RGD Symbol;Acc:1561494]	0.101	-3.31232	8.61176e-06	0.000259002	yes	down	3.01	9.52	9.46	0.61	0.22	0.28	0.06	0.65	0
ENSRNOG00000053272	Chi3l1	chitinase 3 like 1 [Source:RGD Symbol;Acc:620874]	3.216	1.68544	8.65886e-06	0.000259002	yes	up	144.34	93.25	103.96	149.02	118.63	564.58	406.66	455.07	289.3
ENSRNOG00000017693	Slc2a5	solute carrier family 2 member 5 [Source:RGD Symbol;Acc:68328]	2.679	1.42164	8.66545e-06	0.000259002	yes	up	3.85	3.41	3.88	3.96	7.06	7.8	5.52	20.19	9.56
ENSRNOG00000005409	Lrrc9	leucine rich repeat containing 9 [Source:RGD Symbol;Acc:1565716]	0.277	-1.85341	8.66836e-06	0.000259002	yes	down	2.78	3.55	3.83	3.1	0.3	1.08	0.44	1.41	0.74
ENSRNOG00000058819	AABR07056767.1	-	0.058	-4.11919	8.67106e-06	0.000259002	yes	down	0.52	1.51	1.07	0.75	0	0.12	0	0.18	0
ENSRNOG00000000463	Col11a2	collagen type XI alpha 2 chain [Source:RGD Symbol;Acc:2373]	0.363	-1.46037	8.71243e-06	0.000259781	yes	down	3.95	10.42	6.51	6	2.92	1.64	2.15	3.6	1.33
ENSRNOG00000020782	Pspc1	paraspeckle component 1 [Source:RGD Symbol;Acc:1310122]	0.45	-1.15058	8.82574e-06	0.000262356	yes	down	17.53	21.38	20.41	22.68	13.58	11.21	5.71	8.17	9.81
ENSRNOG00000003613	Mid1	midline 1 [Source:RGD Symbol;Acc:2640]	0.306	-1.71047	8.82975e-06	0.000262356	yes	down	6.69	4.6	6.58	2.36	2.5	0.32	0.18	0.71	0.27
ENSRNOG00000055015	AABR07015559.1	-	0.244	-2.03598	8.87293e-06	0.000263178	yes	down	3.33	9.27	9.28	4.08	4.84	7.98	2.3	1.03	2.93
ENSRNOG00000006967	Xiap	X-linked inhibitor of apoptosis [Source:RGD Symbol;Acc:620692]	0.431	-1.21587	9.01178e-06	0.000266831	yes	down	8.53	9.01	7.32	5.78	3.86	2.89	1.94	5.59	2.02
ENSRNOG00000051671	Herc1	HECT and RLD domain containing E3 ubiquitin protein ligase family member 1 [Source:RGD Symbol;Acc:1306366]	0.432	-1.20946	9.03563e-06	0.000267071	yes	down	4.15	4.43	3.9	4.04	1.7	1.2	0.87	2.33	0.7
ENSRNOG00000011619	Myo9a	myosin IXA [Source:RGD Symbol;Acc:621395]	0.301	-1.73397	9.40376e-06	0.000276986	yes	down	3.12	6.51	3.9	4.25	3.37	2.98	0.9	3.32	2.39
ENSRNOG00000047872	AABR07042385.1	-	0.082	-3.61255	9.53799e-06	0.000280453	yes	down	1.51	5.73	3.13	3.51	0	0	0.41	0.58	0.35
ENSRNOG00000019430	Coro1a	coronin 1A [Source:RGD Symbol;Acc:620009]	2.467	1.30272	9.55544e-06	0.00028048	yes	up	30.01	31.53	25.28	31.87	56.06	67.09	35.13	79.01	109.14
ENSRNOG00000018623	Rev1	REV1, DNA directed polymerase [Source:RGD Symbol;Acc:1306715]	0.494	-1.01633	9.58596e-06	0.00028089	yes	down	5.53	5.23	4.71	4.29	2.7	2.46	2.31	3.39	1.56
ENSRNOG00000054665	AABR07066861.1	-	0.233	-2.10362	9.98569e-06	0.000292099	yes	down	11.17	34.2	29.46	23.54	2.05	5.54	12.28	5.12	2.61
ENSRNOG00000011358	Hipk3	homeodomain interacting protein kinase 3 [Source:RGD Symbol;Acc:619884]	0.47	-1.08888	1.00966e-05	0.000294835	yes	down	11.29	10.89	8.58	11.63	7.15	3.76	3.18	7.56	3.43
ENSRNOG00000013351	Stxbp5	syntaxin binding protein 5 [Source:RGD Symbol;Acc:708517]	0.311	-1.68301	1.03238e-05	0.000300952	yes	down	3.14	6.58	4	2.12	1.5	0.55	0.78	2.92	0.38
ENSRNOG00000061280	AABR07068018.2	-	0.013	-6.22326	1.04033e-05	0.000302346	yes	down	1.03	2.08	1.02	1.22	0	0	0	0.1	0
ENSRNOG00000018301	AABR07039356.1	-	0.363	-1.4612	1.04073e-05	0.000302346	yes	down	12.29	14.06	11.2	10.5	7.56	7.6	8.41	6.18	4.63
ENSRNOG00000021181	Sf3b4	splicing factor 3b, subunit 4 [Source:RGD Symbol;Acc:1309667]	2.413	1.27065	1.04962e-05	0.000304407	yes	up	38.02	34.48	45.05	48.09	74.83	97.91	106.1	70.8	106.87
ENSRNOG00000001709	Ap2m1	adaptor related protein complex 2 subunit mu 1 [Source:RGD Symbol;Acc:620135]	2.501	1.32276	1.05637e-05	0.000305842	yes	up	200.34	193.99	165.35	214.6	292.07	481.01	599.15	369.43	446.38
ENSRNOG00000010824	Parp8	poly (ADP-ribose) polymerase family, member 8 [Source:RGD Symbol;Acc:1587384]	0.415	-1.26742	1.05938e-05	0.00030619	yes	down	3.69	3.34	2.41	2.89	1.7	0.87	0.85	2.67	1.46
ENSRNOG00000004778	Cnga1	cyclic nucleotide gated channel subunit alpha 1 [Source:RGD Symbol;Acc:621815]	0.049	-4.34468	1.0625e-05	0.000306572	yes	down	2.94	0.52	0.26	0.53	0.13	0	0	0.05	0.08
ENSRNOG00000018928	AABR07002774.1	-	0.263	-1.92496	1.09397e-05	0.000315115	yes	down	3.47	10.28	7	4.23	0.85	1.69	1.97	2.44	0.48
ENSRNOG00000004831	Arid2	AT-rich interaction domain 2 [Source:RGD Symbol;Acc:1311105]	0.336	-1.57235	1.1049e-05	0.000317725	yes	down	8.01	9.01	7.36	7.22	2.4	0.96	1.68	3.64	0.89
ENSRNOG00000042855	Ahdc1	AT hook, DNA binding motif, containing 1 [Source:RGD Symbol;Acc:1310031]	0.343	-1.54402	1.11643e-05	0.000320497	yes	down	3.45	3.88	5.92	3.56	1.49	1.34	0.67	1.61	0.49
ENSRNOG00000024089	Fndc3b	fibronectin type III domain containing 3B [Source:RGD Symbol;Acc:1311673]	0.425	-1.23396	1.13515e-05	0.000325063	yes	down	10.67	6.78	7.47	10.42	4.3	2.91	1.85	4.48	2.39
ENSRNOG00000021058	Grwd1	glutamate-rich WD repeat containing 1 [Source:RGD Symbol;Acc:1310649]	2.231	1.15788	1.13836e-05	0.000325143	yes	up	9	7.63	6.38	8	13.44	17.48	15.67	14.05	18.67
ENSRNOG00000010479	Mycbp2	MYC binding protein 2 [Source:RGD Symbol;Acc:1312048]	0.381	-1.39289	1.15659e-05	0.000329241	yes	down	16.8	20	21.98	14.35	6.86	5.56	5.78	8.83	1.91
ENSRNOG00000016971	Zfp612	zinc finger protein 612 [Source:RGD Symbol;Acc:1307197]	0.317	-1.65771	1.18113e-05	0.000335662	yes	down	3.02	5.28	1.87	4.03	1.03	2.08	0.6	2.33	0.4
ENSRNOG00000001090	Stard13	StAR-related lipid transfer domain containing 13 [Source:RGD Symbol;Acc:1564816]	0.329	-1.60216	1.18924e-05	0.000337403	yes	down	9.55	6.33	5.51	8.15	2.48	1.13	0.82	2.46	2.58
ENSRNOG00000007964	Tp53inp1	tumor protein p53 inducible nuclear protein 1 [Source:RGD Symbol;Acc:631423]	0.343	-1.54461	1.20014e-05	0.000339657	yes	down	2.93	4.34	2.28	2.12	0.82	0.34	0.73	1.13	0.62
ENSRNOG00000002908	Slc35a4	solute carrier family 35, member A4 [Source:RGD Symbol;Acc:628792]	2.203	1.13946	1.20465e-05	0.000340068	yes	up	36.69	33.87	26.77	41.96	59.61	85.04	50.12	65.4	97.67
ENSRNOG00000055850	LOC100910750	putative pre-mRNA-splicing factor ATP-dependent RNA helicase DHX15-like [Source:RGD Symbol;Acc:6497185]	0.159	-2.65494	1.2081e-05	0.000340134	yes	down	0.93	2.83	1.56	1.17	0.13	0.42	0.4	0.61	0.11
ENSRNOG00000023760	Plekhm3	pleckstrin homology domain containing M3 [Source:RGD Symbol;Acc:1307151]	0.15	-2.73857	1.20889e-05	0.000340134	yes	down	17.72	16.14	16.04	16.8	3.29	1.62	0.24	13.9	1.28
ENSRNOG00000013388	Pgap1	post-GPI attachment to proteins inositol deacylase 1 [Source:RGD Symbol;Acc:1303213]	0.293	-1.77087	1.21721e-05	0.000341907	yes	down	1.67	2.56	2.25	1.83	0.69	0.56	0.25	1.25	0.33
ENSRNOG00000052980	AABR07072362.1	-	0.075	-3.73325	1.24202e-05	0.000347725	yes	down	0.13	0.94	0.89	0.18	0.04	0.06	0	0.1	0.02
ENSRNOG00000031197	F8	coagulation factor VIII [Source:RGD Symbol;Acc:727845]	0.387	-1.37018	1.24822e-05	0.000348885	yes	down	2.69	4.95	5.04	4.81	1.62	1.73	1.95	1.15	1.23
ENSRNOG00000020388	Inpp5f	inositol polyphosphate-5-phosphatase F [Source:RGD Symbol;Acc:1305777]	0.437	-1.19556	1.25057e-05	0.000348967	yes	down	22.53	38.18	32.64	26.72	7.86	7.79	8.05	16.03	4.87
ENSRNOG00000053210	Zc3h11a	zinc finger CCCH-type containing 11A [Source:RGD Symbol;Acc:1308290]	0.449	-1.1568	1.26549e-05	0.000352551	yes	down	11.44	14.54	11.31	10.74	5.19	3.98	4.87	6.84	2.39
ENSRNOG00000016189	Frmd5	FERM domain containing 5 [Source:RGD Symbol;Acc:1561554]	0.367	-1.44657	1.28009e-05	0.000356034	yes	down	8.89	13.59	9.94	4.52	3.92	6.56	2.87	7.05	3.59
ENSRNOG00000005575	Abi3	ABI family, member 3 [Source:RGD Symbol;Acc:1311794]	2.373	1.24698	1.28735e-05	0.000357465	yes	up	5.02	8.3	4.86	5.05	10.11	13.33	11	12.64	16.39
ENSRNOG00000007219	LOC103692716	heat shock protein HSP 90-alpha [Source:RGD Symbol;Acc:9292348]	0.461	-1.11754	1.30084e-05	0.000360621	yes	down	305.79	439.75	282.44	249.71	128.46	151.77	115.76	237.77	81.05
ENSRNOG00000016396	Fbxo11	F-box protein 11 [Source:RGD Symbol;Acc:727935]	0.444	-1.17042	1.31687e-05	0.00036447	yes	down	10.44	21.09	13.69	13.96	4.06	5.06	5.8	7.84	3.99
ENSRNOG00000049434	AABR07001048.1	-	0.105	-3.24673	1.33606e-05	0.000369179	yes	down	0.9	6.88	5.31	4.19	0.11	0.69	0.47	0.59	0.28
ENSRNOG00000026299	Mysm1	myb-like, SWIRM and MPN domains 1 [Source:RGD Symbol;Acc:1311787]	0.359	-1.47851	1.3503e-05	0.000372508	yes	down	3.85	7.52	5.34	4.31	1.6	2.23	2.03	1.92	0.99
ENSRNOG00000048493	AABR07008293.3	-	0.077	-3.70265	1.35587e-05	0.000373436	yes	down	1.6	5.76	2.42	1.96	0.36	0.45	0.24	0	0
ENSRNOG00000013391	Sorbs2	sorbin and SH3 domain containing 2 [Source:RGD Symbol;Acc:620061]	0.426	-1.23034	1.37797e-05	0.000378908	yes	down	12.58	17.85	17.77	16.63	6.14	5.8	5.62	10.32	3.07
ENSRNOG00000056687	AABR07049085.2	-	0.018	-5.80992	1.38583e-05	0.000380452	yes	down	0.34	0.57	1.09	0.86	0.05	0	0	0	0
ENSRNOG00000058436	LOC108348215	zinc finger protein 420-like [Source:RGD Symbol;Acc:11371780]	0.32	-1.64262	1.4628e-05	0.000400934	yes	down	4.4	11.66	4.63	10.61	0.51	1.23	1.42	1.08	1.83
ENSRNOG00000056753	Hectd2	HECT domain E3 ubiquitin protein ligase 2 [Source:RGD Symbol;Acc:1305536]	0.308	-1.69874	1.47313e-05	0.000403116	yes	down	1.85	4.22	2.64	2.53	1.17	0.47	0.41	1.63	0.62
ENSRNOG00000033397	Adamts20	ADAM metallopeptidase with thrombospondin type 1 motif, 20 [Source:RGD Symbol;Acc:1307725]	0.169	-2.56903	1.47625e-05	0.000403318	yes	down	4.47	17.06	11.58	6.66	2.73	1.23	0.9	1.76	0.08
ENSRNOG00000048051	AABR07021054.1	-	0.179	-2.47946	1.48422e-05	0.000404844	yes	down	3.01	7.63	6.02	1.69	1.29	0.82	1.66	2.86	1.9
ENSRNOG00000022485	Chuk	component of inhibitor of nuclear factor kappa B kinase complex [Source:RGD Symbol;Acc:1306661]	0.385	-1.37611	1.51957e-05	0.000413822	yes	down	8.11	8.81	6.21	6.19	2.61	3.5	1.52	5.19	1.31
ENSRNOG00000011280	Mllt3	MLLT3, super elongation complex subunit [Source:RGD Symbol;Acc:620940]	0.463	-1.11088	1.5284e-05	0.000414893	yes	down	5.58	5.47	4.93	6.62	2.82	2.79	1.91	3.9	1.29
ENSRNOG00000025502	Arhgef37	Rho guanine nucleotide exchange factor 37 [Source:RGD Symbol;Acc:1560471]	0.346	-1.53122	1.54188e-05	0.000417883	yes	down	6.79	16.29	11.49	7.33	1.65	2.04	3.26	3.14	1.68
ENSRNOG00000053044	AABR07012775.1	-	0.055	-4.19141	1.5525e-05	0.000420092	yes	down	2.47	8.9	5.69	5.39	0.75	0.25	0.23	0.29	0
ENSRNOG00000003261	Usp9x	ubiquitin specific peptidase 9, X-linked [Source:RGD Symbol;Acc:1560056]	0.417	-1.26282	1.60162e-05	0.000432006	yes	down	19.36	27.35	24.62	19.45	6.42	7.26	8.21	11.84	3.48
ENSRNOG00000056128	AABR07064719.2	-	0.334	-1.58147	1.62067e-05	0.000436449	yes	down	7.52	15.73	12.79	11.02	2.12	7.07	3.13	5.74	1.95
ENSRNOG00000049057	Znrf2	zinc and ring finger 2 [Source:RGD Symbol;Acc:1306645]	0.463	-1.11014	1.62856e-05	0.000437879	yes	down	9.32	16.3	13.13	9.19	2.44	1.7	4.47	3.16	4.25
ENSRNOG00000020994	Slc25a39	solute carrier family 25, member 39 [Source:RGD Symbol;Acc:1306193]	2.121	1.0849	1.64126e-05	0.000440594	yes	up	74.32	74.59	63.95	94.54	147.67	157.3	132.85	122.77	193.31
ENSRNOG00000010331	Ctsb	cathepsin B [Source:RGD Symbol;Acc:621509]	2.349	1.23217	1.67928e-05	0.00044938	yes	up	504.33	388.8	315.36	673.54	827.27	984.95	1102.06	976.8	1177.78
ENSRNOG00000020318	Pnkp	polynucleotide kinase 3'-phosphatase [Source:RGD Symbol;Acc:1303331]	2.171	1.11812	1.69298e-05	0.000452331	yes	up	7.37	7.52	4.91	5.18	10.51	16.93	11.08	12.99	16.11
ENSRNOG00000001375	Gal3st4	galactose-3-O-sulfotransferase 4 [Source:RGD Symbol;Acc:1561105]	2.266	1.1803	1.69692e-05	0.000452672	yes	up	8.14	10.15	9.15	11.77	18.55	21.63	21.22	15.2	22.18
ENSRNOG00000000942	Pan3	poly(A) specific ribonuclease subunit PAN3 [Source:RGD Symbol;Acc:1590880]	0.375	-1.41452	1.7338e-05	0.000461783	yes	down	5.29	6.48	4.59	5.39	1.8	1.52	2.09	3.18	0.87
ENSRNOG00000057699	AABR07021596.4	-	0.364	-1.45864	1.75028e-05	0.000465443	yes	down	3.96	7.67	8.37	5.6	3.03	1.81	2.18	2.85	1.22
ENSRNOG00000007294	Sntg1	syntrophin, gamma 1 [Source:RGD Symbol;Acc:1560290]	0.123	-3.01857	1.77817e-05	0.000472118	yes	down	2.9	11.65	5.88	1.88	0.7	1.43	0.05	1.95	0.27
ENSRNOG00000024535	Zzef1	zinc finger ZZ-type and EF-hand domain containing 1 [Source:RGD Symbol;Acc:1311189]	0.295	-1.76077	1.78269e-05	0.000472579	yes	down	9.59	10.27	13.9	12.32	4.55	4.19	0.5	5.15	2.47
ENSRNOG00000030712	RT1-A2	RT1 class Ia, locus A2 [Source:RGD Symbol;Acc:1595923]	2.99	1.58017	1.81026e-05	0.00047914	yes	up	84.59	72.33	76.97	141.12	158.06	281.28	183.17	172.77	457.73
ENSRNOG00000005308	Tmx2	thioredoxin-related transmembrane protein 2 [Source:RGD Symbol;Acc:1359456]	2.165	1.11451	1.85646e-05	0.000490603	yes	up	29.07	35.35	28.8	42.93	54.96	70.92	79.72	64.03	67.7
ENSRNOG00000025580	LOC100912618	ubiquitin-conjugating enzyme E2 variant 1-like [Source:RGD Symbol;Acc:6486058]	2.386	1.25435	1.8929e-05	0.000499455	yes	up	96.29	104.65	81.08	109.88	157.54	222.67	267.71	163.77	240.03
ENSRNOG00000052395	AABR07071395.1	-	0.175	-2.51276	1.92364e-05	0.000506778	yes	down	1.29	3.32	3.12	1.02	0.31	0.4	0.23	1.07	0.61
ENSRNOG00000008658	Mitf	melanocyte inducing transcription factor [Source:RGD Symbol;Acc:3092]	0.354	-1.49843	1.9537e-05	0.000513899	yes	down	11.26	24.57	16.43	6.43	2.34	2.8	2.11	4.04	1.19
ENSRNOG00000038068	Pcdh9	protocadherin 9 [Source:RGD Symbol;Acc:1306348]	0.338	-1.56301	1.97173e-05	0.000517039	yes	down	29.42	50.87	22.48	15.71	7.53	8.89	7.17	19.83	3.39
ENSRNOG00000017132	Snx30	sorting nexin family member 30 [Source:RGD Symbol;Acc:1311367]	0.346	-1.53135	1.99206e-05	0.00052076	yes	down	3.33	3.77	2.86	1.99	1.18	0.9	0.51	1.32	1.66
ENSRNOG00000011076	Ank2	ankyrin 2 [Source:RGD Symbol;Acc:620156]	0.463	-1.11122	2.02428e-05	0.000527557	yes	down	30	41.9	28.93	27.72	8.24	9.81	8.43	21.23	7.79
ENSRNOG00000008807	Rp1	RP1, axonemal microtubule associated [Source:RGD Symbol;Acc:1596713]	0.033	-4.90525	2.08534e-05	0.000541806	yes	down	1.94	0.31	0.05	0.05	0.03	0.01	0	0	0.05
ENSRNOG00000011595	Senp8	SUMO peptidase family member, NEDD8 specific [Source:RGD Symbol;Acc:1309955]	0.379	-1.40153	2.09941e-05	0.000544628	yes	down	14.49	25.28	23.81	14.75	8.88	6.2	3.66	9.22	6.68
ENSRNOG00000014066	Jade1	jade family PHD finger 1 [Source:RGD Symbol;Acc:1306920]	0.415	-1.26747	2.12593e-05	0.000550664	yes	down	3.49	10.51	8.19	9.36	1.07	2.15	1.84	3.05	1.39
ENSRNOG00000001457	Rfc2	replication factor C subunit 2 [Source:RGD Symbol;Acc:621198]	2.865	1.5184	2.14621e-05	0.000555069	yes	up	9.55	9.55	10.11	9.97	13.61	28.32	34.42	18.58	31.64
ENSRNOG00000004753	Napb	NSF attachment protein beta [Source:RGD Symbol;Acc:1589649]	0.265	-1.91537	2.17104e-05	0.000560637	yes	down	0.98	1.61	1.82	2.82	0.47	0.35	0.3	1.05	0.25
ENSRNOG00000014276	Plce1	phospholipase C, epsilon 1 [Source:RGD Symbol;Acc:69424]	0.354	-1.49735	2.20569e-05	0.00056872	yes	down	20.7	42.86	49.38	29.46	2.96	4.52	1.51	5.78	0.78
ENSRNOG00000017318	Zfp322a	zinc finger protein 322a [Source:RGD Symbol;Acc:1594230]	0.422	-1.24355	2.21286e-05	0.000569703	yes	down	9.01	10.56	7.92	6.88	3.5	4.54	7.5	6.11	2.94
ENSRNOG00000014673	Eri2	ERI1 exoribonuclease family member 2 [Source:RGD Symbol;Acc:1583889]	0.376	-1.4098	2.23627e-05	0.000574856	yes	down	1.83	2.2	1.86	2.18	0.59	0.63	1.09	0.76	0.61
ENSRNOG00000005726	Pclo	piccolo (presynaptic cytomatrix protein) [Source:RGD Symbol;Acc:69406]	0.15	-2.73555	2.2564e-05	0.000579153	yes	down	1.69	6.75	8.27	2.38	1.2	0.12	0.03	0.3	0.02
ENSRNOG00000034269	Ago3	argonaute RISC catalytic component 3 [Source:RGD Symbol;Acc:1309163]	0.438	-1.19214	2.29446e-05	0.000587146	yes	down	4.75	5.21	4.35	3.19	2.09	1.29	1.42	3.29	1.35
ENSRNOG00000031979	Mt-atp6	mitochondrially encoded ATP synthase 6 [Source:RGD Symbol;Acc:621239]	0.498	-1.00435	2.36227e-05	0.000603587	yes	down	18961.8	25028.4	15182.6	18390.1	13117.4	8485.28	6648.62	12420.5	6034.24
ENSRNOG00000002212	Hsd17b13	hydroxysteroid (17-beta) dehydrogenase 13 [Source:RGD Symbol;Acc:1359553]	0.107	-3.21766	2.36625e-05	0.000603697	yes	down	1.7	0.66	4.37	1.82	0.26	0.16	0.09	0.61	0.09
ENSRNOG00000061607	Lmbr1l	limb development membrane protein 1-like [Source:RGD Symbol;Acc:1309631]	0.322	-1.63285	2.37411e-05	0.000604793	yes	down	3.48	4.54	4.38	3.18	0.61	1.85	0.67	1.7	1.28
ENSRNOG00000020621	Dcst1	DC-STAMP domain containing 1 [Source:RGD Symbol;Acc:1307756]	0.19	-2.3977	2.41818e-05	0.000615096	yes	down	8.98	9.43	8.5	4.46	1.84	0.87	0.23	0.97	0.81
ENSRNOG00000050152	Chsy3	chondroitin sulfate synthase 3 [Source:RGD Symbol;Acc:1560819]	0.188	-2.41277	2.46572e-05	0.000626249	yes	down	10.96	18.85	7.58	4.39	4.62	1.64	6.4	0.97	0.22
ENSRNOG00000009995	Rapgef6	Rap guanine nucleotide exchange factor 6 [Source:RGD Symbol;Acc:1307645]	0.333	-1.58477	2.47511e-05	0.000627694	yes	down	5.73	3.33	3.28	1.93	2.08	1.63	1.75	0.71	1.01
ENSRNOG00000051135	Tug1	taurine up-regulated 1 [Source:RGD Symbol;Acc:9685395]	0.46	-1.12103	2.48622e-05	0.000628951	yes	down	6.07	6.37	5.92	5.48	3.57	1.81	1.76	4.81	2.43
ENSRNOG00000051560	AABR07016865.1	calcium/calmodulin-dependent protein kinase type II subunit gamma-like [Source:NCBI gene;Acc:100909586]	0.022	-5.4747	2.48775e-05	0.000628951	yes	down	0.12	2.4	3.24	1.02	0	0	0	0.25	0
ENSRNOG00000001415	Ap1s1	adaptor related protein complex 1 subunit sigma 1 [Source:RGD Symbol;Acc:1305911]	2.096	1.06798	2.52639e-05	0.000636892	yes	up	58.23	40.47	42.67	46.65	72.72	104.51	79.95	87.47	115.41
ENSRNOG00000006559	Akap8	A-kinase anchoring protein 8 [Source:RGD Symbol;Acc:620832]	0.433	-1.20612	2.53966e-05	0.000638777	yes	down	7.01	16.11	7.97	8.83	2.95	4.67	2.37	6.5	1.94
ENSRNOG00000000248	Srsf2	serine and arginine rich splicing factor 2 [Source:RGD Symbol;Acc:1359422]	0.48	-1.06019	2.5414e-05	0.000638777	yes	down	68.47	101.35	82	72.4	53.36	37.92	22.79	66.4	31.47
ENSRNOG00000011509	Agk	acylglycerol kinase [Source:RGD Symbol;Acc:1562046]	2.112	1.07873	2.60619e-05	0.000654093	yes	up	3.94	3.39	3.81	5.47	6.79	9.41	7.68	9.04	8.71
ENSRNOG00000051756	Zfp62	zinc finger protein 62 [Source:RGD Symbol;Acc:1560191]	0.353	-1.50376	2.61829e-05	0.000656158	yes	down	5.57	6.65	3.73	3.92	1.24	1.57	1.19	3.56	0.68
ENSRNOG00000014380	AABR07003176.1	-	0.436	-1.19748	2.62741e-05	0.000657473	yes	down	5.51	11.54	8.79	10.26	3.56	4.03	3.58	3.78	2.35
ENSRNOG00000059087	LOC102546889	cytoplasmic dynein 1 light intermediate chain 1-like [Source:RGD Symbol;Acc:7612966]	0.014	-6.15712	2.63172e-05	0.000657582	yes	down	0.15	0.65	0.28	0.21	0	0	0	0	0
ENSRNOG00000015024	Mcoln3	mucolipin 3 [Source:RGD Symbol;Acc:1308420]	0.138	-2.86157	2.63852e-05	0.00065831	yes	down	36.23	82.02	97.12	28.61	10.54	5.54	2.4	16.65	0.32
ENSRNOG00000061080	Kmt2c	lysine methyltransferase 2C [Source:RGD Symbol;Acc:1587205]	0.346	-1.53212	2.65516e-05	0.00066149	yes	down	15.33	30.74	29.33	21.34	6.79	2.76	5.6	12.7	3.02
ENSRNOG00000025261	LOC691254	hypothetical protein LOC691254 [Source:RGD Symbol;Acc:1586256]	0.234	-2.09273	2.67792e-05	0.000666181	yes	down	6.64	10.98	6.04	5.13	0.86	2.27	2.4	0.96	0.89
ENSRNOG00000039744	RT1-CE4	RT1 class I, locus CE4 [Source:RGD Symbol;Acc:1598234]	2.688	1.42645	2.70618e-05	0.000672225	yes	up	154.59	140.75	149.93	297.27	291.62	432.57	380.79	285.05	700.12
ENSRNOG00000016462	LOC102547287	zinc finger protein 728-like [Source:RGD Symbol;Acc:7718701]	0.341	-1.55241	2.71353e-05	0.000673066	yes	down	3.93	8.8	5.01	4.36	1.9	2.66	0.65	2.2	0.89
ENSRNOG00000051662	AABR07041586.1	-	0.035	-4.81698	2.74522e-05	0.000679934	yes	down	0.31	2.11	1.91	1.69	0	0.13	0.11	0.02	0
ENSRNOG00000058935	AABR07014289.1	-	0.089	-3.49486	2.75546e-05	0.000681475	yes	down	1.01	4.85	2.98	1.84	0.51	0.11	0.03	0.52	0
ENSRNOG00000023278	Sec61a2	Sec61 translocon alpha 2 subunit [Source:RGD Symbol;Acc:1305948]	2.484	1.31247	2.80501e-05	0.000692718	yes	up	5.11	10.47	12.42	13.38	22.78	28.39	12.44	38.33	21.61
ENSRNOG00000020996	Vps51	VPS51 GARP complex subunit [Source:MGI Symbol;Acc:MGI:1915755]	2.18	1.12403	2.83463e-05	0.000699016	yes	up	3.31	5.44	2.61	5.73	10.22	8.45	6.82	11.04	7.52
ENSRNOG00000054246	LOC679711	similar to RIKEN cDNA 5031410I06 [Source:RGD Symbol;Acc:1584830]	0.406	-1.30184	2.87927e-05	0.000708758	yes	down	9.39	11.55	11.67	12.42	4.83	5.41	4.01	6.07	5.45
ENSRNOG00000051390	AABR07035064.1	-	0.034	-4.89067	2.88249e-05	0.000708758	yes	down	0	6.65	3.64	5.01	0.13	0.15	0	0.32	0
ENSRNOG00000022242	Cxcl9	C-X-C motif chemokine ligand 9 [Source:RGD Symbol;Acc:628798]	10.49	3.39095	2.91431e-05	0.000714112	yes	up	0.42	0.44	0.37	0.79	1.44	8.27	1.1	0.41	12.79
ENSRNOG00000046968	Nol8	nucleolar protein 8 [Source:RGD Symbol;Acc:1309551]	0.361	-1.46841	2.91487e-05	0.000714112	yes	down	1.79	1.9	1.44	1.68	0.64	0.78	0.27	1.04	0.34
ENSRNOG00000017414	Irf7	interferon regulatory factor 7 [Source:RGD Symbol;Acc:1307828]	3.785	1.92025	2.91689e-05	0.000714112	yes	up	10.82	14.29	12.33	19.18	61.05	30.53	26.84	19.61	103.6
ENSRNOG00000042068	Otud7b	OTU deubiquitinase 7B [Source:RGD Symbol;Acc:1308111]	0.444	-1.17116	2.96188e-05	0.000724081	yes	down	20.71	31.24	23.79	19.06	10.82	9.51	14.47	18.2	6.9
ENSRNOG00000027962	Smg7	SMG7 nonsense mediated mRNA decay factor [Source:RGD Symbol;Acc:1310761]	0.394	-1.34387	2.96685e-05	0.000724254	yes	down	3.59	5.77	6.1	4.26	1.75	1.11	0.76	2.7	1.31
ENSRNOG00000016108	Phlpp2	PH domain and leucine rich repeat protein phosphatase 2 [Source:RGD Symbol;Acc:1562857]	0.113	-3.14458	3.04247e-05	0.000740582	yes	down	6.36	5.58	7.21	3.41	0.1	0.4	4.3	0.39	0.05
ENSRNOG00000054508	Foxp2	forkhead box P2 [Source:RGD Symbol;Acc:1559697]	0.366	-1.45134	3.13491e-05	0.000760237	yes	down	3.67	3.4	16.66	3.58	1.17	0.55	0.61	2.93	0.68
ENSRNOG00000022060	Magi1	membrane associated guanylate kinase, WW and PDZ domain containing 1 [Source:RGD Symbol;Acc:1586025]	0.374	-1.41969	3.13666e-05	0.000760237	yes	down	1.5	2.47	3.11	2.09	1.07	0.91	0.31	1.05	0.68
ENSRNOG00000011313	Sorcs1	sortilin-related VPS10 domain containing receptor 1 [Source:RGD Symbol;Acc:1305910]	0.3	-1.73839	3.15657e-05	0.000763971	yes	down	14.05	28.62	14.5	14.22	5.79	2.92	6.43	5.78	2.96
ENSRNOG00000019900	Slc35b2	solute carrier family 35 member B2 [Source:RGD Symbol;Acc:1565318]	2.06	1.04261	3.18152e-05	0.000768913	yes	up	29.63	33.25	31.89	39.54	58.56	61.26	74.75	57.81	64.4
ENSRNOG00000010484	Zdhhc21	zinc finger, DHHC-type containing 21 [Source:RGD Symbol;Acc:1305750]	0.368	-1.44047	3.19437e-05	0.000770921	yes	down	3.56	5.05	5.37	3.55	2.18	1	1.68	3.49	1.21
ENSRNOG00000000413	Pln	phospholamban [Source:RGD Symbol;Acc:619894]	0.101	-3.30376	3.2254e-05	0.000777151	yes	down	0.96	0.59	1.92	1.53	0.05	0.35	0.12	0.1	0
ENSRNOG00000051670	AABR07034573.1	-	0.455	-1.13547	3.23487e-05	0.000777151	yes	down	2.94	2.83	2.21	3.89	1.65	1.07	1.33	1.33	0.9
ENSRNOG00000006180	Pum2	pumilio RNA-binding family member 2 [Source:RGD Symbol;Acc:1311024]	0.47	-1.08938	3.2373e-05	0.000777151	yes	down	17.43	18.76	15.35	14.79	7.64	5.83	8.01	11.03	4.29
ENSRNOG00000004048	Lrrk2	leucine-rich repeat kinase 2 [Source:RGD Symbol;Acc:1561168]	0.434	-1.20494	3.26072e-05	0.000781375	yes	down	6.27	4.96	2.78	2.87	1.47	0.93	1.16	1.9	0.82
ENSRNOG00000031431	Cdca8	cell division cycle associated 8 [Source:RGD Symbol;Acc:1566306]	3.03	1.59936	3.27203e-05	0.00078298	yes	up	1.6	1.59	1.56	3.71	4.34	6.68	6.59	5.5	6.32
ENSRNOG00000008616	Ubr3	ubiquitin protein ligase E3 component n-recognin 3 [Source:RGD Symbol;Acc:1565257]	0.473	-1.0807	3.31408e-05	0.000791924	yes	down	5.79	8.03	4.48	4.91	2.91	1.68	2.1	2.51	1.58
ENSRNOG00000056319	U6	U6 spliceosomal RNA [Source:RFAM;Acc:RF00026]	0.311	-1.68543	3.33786e-05	0.000795368	yes	down	1.04	3.41	2.51	3.19	0.57	0.91	0.48	1.47	0.73
ENSRNOG00000049604	Mvk	mevalonate kinase [Source:RGD Symbol;Acc:621295]	2.509	1.32732	3.34514e-05	0.000795983	yes	up	9.41	9.96	9.56	14.34	17.61	24.78	30.81	21.38	28.59
ENSRNOG00000002280	Sh3bgrl	SH3 domain binding glutamate-rich protein like [Source:RGD Symbol;Acc:1560520]	0.433	-1.20658	3.42888e-05	0.00081305	yes	down	33.05	58.66	49.15	40.42	19.53	19.83	9.55	34.62	11.85
ENSRNOG00000007315	Thoc2	THO complex 2 [Source:RGD Symbol;Acc:1561623]	0.4	-1.32308	3.43124e-05	0.00081305	yes	down	4.92	8.32	4.96	5.04	1.63	3.23	2.47	4.02	1.07
ENSRNOG00000061295	AABR07004085.1	-	0.051	-4.2845	3.50021e-05	0.000828238	yes	down	5.6	7.82	2.18	2.23	0.16	0	0.78	0	0
ENSRNOG00000013620	Cdk13	cyclin-dependent kinase 13 [Source:RGD Symbol;Acc:1311226]	0.431	-1.21456	3.50733e-05	0.000828766	yes	down	9.66	14.79	13.94	11.45	6.79	3.37	2.75	8.75	2.68
ENSRNOG00000008554	Slc9a9	solute carrier family 9 member A9 [Source:RGD Symbol;Acc:1560736]	0.406	-1.3007	3.5159e-05	0.000829635	yes	down	5.51	10.53	10.83	9.49	2.85	3.6	2.81	7.42	5.81
ENSRNOG00000028627	Hmcn1	hemicentin 1 [Source:RGD Symbol;Acc:1564772]	0.458	-1.12795	3.54298e-05	0.000834354	yes	down	19.52	14.51	15.78	13.79	8.66	7.88	8.14	6.87	5.66
ENSRNOG00000004696	Arhgap5	Rho GTPase activating protein 5 [Source:RGD Symbol;Acc:1308507]	0.404	-1.30693	3.54573e-05	0.000834354	yes	down	15.3	23.53	14.63	11.96	4.18	8.12	7.36	10.31	2.18
ENSRNOG00000014007	Gfod1	glucose-fructose oxidoreductase domain containing 1 [Source:RGD Symbol;Acc:1311507]	0.064	-3.9762	3.60626e-05	0.000847422	yes	down	2.61	3.9	1.55	1.38	0.23	0	0	0.54	0
ENSRNOG00000058760	AC114845.2	-	0.015	-6.06305	3.61174e-05	0.000847534	yes	down	0.43	1.4	0.98	0.58	0	0	0	0	0
ENSRNOG00000059480	Supt20h	SPT20 homolog, SAGA complex component [Source:RGD Symbol;Acc:1307812]	0.471	-1.08693	3.6401e-05	0.00085188	yes	down	9.33	22.55	14.34	19.44	8.36	6.97	5.63	7.05	5.75
ENSRNOG00000059919	Mtg2	mitochondrial ribosome-associated GTPase 2 [Source:RGD Symbol;Acc:1359243]	2.308	1.20661	3.6403e-05	0.00085188	yes	up	8.14	10.9	10.01	10.54	15.83	21.67	23.07	17.82	26.67
ENSRNOG00000062181	AABR07072236.1	-	0.438	-1.19222	3.65847e-05	0.000853776	yes	down	27.86	33.69	30.54	26.74	12.13	10.88	13.08	20.2	6.18
ENSRNOG00000025793	Usp31	ubiquitin specific peptidase 31 [Source:RGD Symbol;Acc:1308183]	0.31	-1.69121	3.80239e-05	0.000885242	yes	down	3.66	6.04	8.17	3.93	1.06	0.65	8.37	2.01	2.39
ENSRNOG00000017294	Zranb1	zinc finger RANBP2-type containing 1 [Source:RGD Symbol;Acc:2321751]	0.499	-1.00203	3.82938e-05	0.000889989	yes	down	8.79	11.37	10.72	10.43	6.08	4.65	3.96	9.46	3.13
ENSRNOG00000009170	Dmxl2	Dmx-like 2 [Source:RGD Symbol;Acc:1586163]	0.411	-1.28385	3.84658e-05	0.000892765	yes	down	0.99	1.18	0.74	1.19	0.52	0.36	0.31	0.63	0.21
ENSRNOG00000037886	Hs6st3	heparan sulfate 6-O-sulfotransferase 3 [Source:RGD Symbol;Acc:1305888]	0.181	-2.46781	3.90297e-05	0.000902149	yes	down	24.33	50.36	22.39	42.9	5.63	3.26	6.77	0.07	0.59
ENSRNOG00000027921	Rlf	rearranged L-myc fusion [Source:RGD Symbol;Acc:1305297]	0.305	-1.71315	3.92291e-05	0.000905202	yes	down	4.74	10.32	8.9	7.06	0.75	3.21	1.85	2.56	0.3
ENSRNOG00000007443	Jag1	jagged canonical Notch ligand 1 [Source:RGD Symbol;Acc:2937]	0.291	-1.78121	3.92685e-05	0.000905202	yes	down	1.97	1.18	0.81	0.73	0.38	0.54	0.23	0.27	0.22
ENSRNOG00000029773	Atm	ATM serine/threonine kinase [Source:RGD Symbol;Acc:1593265]	0.424	-1.23815	3.9475e-05	0.000907295	yes	down	3.71	4.05	3.35	9.33	3.41	3.75	3.79	1.67	5.59
ENSRNOG00000051563	Giot1	gonadotropin inducible ovarian transcription factor 1 [Source:RGD Symbol;Acc:620184]	0.382	-1.38715	3.95026e-05	0.000907295	yes	down	4.07	7.95	6.38	7.04	2.03	4.25	0.82	4.26	2.31
ENSRNOG00000003864	Gipc1	GIPC PDZ domain containing family, member 1 [Source:RGD Symbol;Acc:68338]	2.041	1.02947	3.95197e-05	0.000907295	yes	up	40.68	43.98	35.39	36.53	63.62	81.58	78.63	60.67	81.98
ENSRNOG00000054286	Rrm2	ribonucleotide reductase regulatory subunit M2 [Source:RGD Symbol;Acc:1598310]	4.781	2.25724	3.96039e-05	0.000907999	yes	up	0.43	1.02	0.19	0.66	2.94	3.8	1.08	3.54	2.4
ENSRNOG00000050966	AABR07024757.1	-	0.085	-3.5537	4.00019e-05	0.000914653	yes	down	0.42	0.97	0.65	0.42	0	0	0.09	0.14	0.02
ENSRNOG00000046202	Metrnl	meteorin-like, glial cell differentiation regulator [Source:RGD Symbol;Acc:1359271]	2.796	1.48314	4.08795e-05	0.000933061	yes	up	11.33	5.18	12.24	9.45	14.37	28.82	24.31	22.2	32.83
ENSRNOG00000003954	Il2rg	interleukin 2 receptor subunit gamma [Source:RGD Symbol;Acc:621466]	3.919	1.97045	4.09504e-05	0.000933061	yes	up	1.21	0.87	1.13	2.23	2.71	4.44	6.77	3.08	5.66
ENSRNOG00000052264	AABR07034393.1	-	0.086	-3.53188	4.10834e-05	0.000933061	yes	down	0.83	1.62	0.76	0.56	0	0	0.09	0.29	0.04
ENSRNOG00000059865	Dnah12	dynein, axonemal, heavy chain 12 [Source:RGD Symbol;Acc:619990]	0.216	-2.20802	4.1137e-05	0.000933061	yes	down	26.48	31.41	25.05	14.62	0.31	3.47	0.91	4.26	0.54
ENSRNOG00000060341	AABR07031399.1	-	0.166	-2.58759	4.14013e-05	0.000937802	yes	down	1.31	3.17	3.92	1.82	0.17	0.29	0	0.52	0.27
ENSRNOG00000018131	Slc16a4	solute carrier family 16, member 4 [Source:RGD Symbol;Acc:1359655]	0.341	-1.5512	4.19937e-05	0.000949954	yes	down	8.45	9.72	9.34	15.14	4.27	4.23	3.36	2.03	6.93
ENSRNOG00000057879	AABR07044408.2	-	3.711	1.89164	4.20907e-05	0.00095088	yes	up	21.89	26.44	15.13	16.48	44.58	76.39	25.26	44.61	149.71
ENSRNOG00000052684	U6	U6 spliceosomal RNA [Source:RFAM;Acc:RF00026]	0.224	-2.15923	4.52427e-05	0.00101667	yes	down	3.15	5.95	6.78	2.95	0.97	0.53	1.22	1.14	1
ENSRNOG00000007430	Slx4ip	SLX4 interacting protein [Source:RGD Symbol;Acc:1563120]	0.308	-1.69949	4.56891e-05	0.00102535	yes	down	6.72	7.9	7.64	8.31	2.44	1.37	2	2.9	0.93
ENSRNOG00000002146	Pkd2	polycystin 2, transient receptor potential cation channel [Source:RGD Symbol;Acc:1559992]	0.472	-1.08296	4.60189e-05	0.00103138	yes	down	13.54	15.83	12.43	25.87	8.68	6.82	3.15	7.94	4.44
ENSRNOG00000015459	Heatr3	HEAT repeat containing 3 [Source:RGD Symbol;Acc:1308267]	0.456	-1.1318	4.65377e-05	0.00104164	yes	down	18.09	16.35	12.58	13.47	4.54	8.21	3.33	12.64	5.86
ENSRNOG00000058497	Fdxr	ferredoxin reductase [Source:RGD Symbol;Acc:621648]	2.141	1.09853	4.73267e-05	0.0010579	yes	up	2.62	4.22	2.39	2.5	5.41	6.85	5.26	6.98	5.04
ENSRNOG00000006946	Arhgap9	Rho GTPase activating protein 9 [Source:RGD Symbol;Acc:1305342]	3.582	1.84088	4.79469e-05	0.00106945	yes	up	2.5	1.96	1.99	2.29	2.76	6.54	10.19	5.34	10.02
ENSRNOG00000030572	Smc5	structural maintenance of chromosomes 5 [Source:RGD Symbol;Acc:1307492]	0.363	-1.46211	4.79696e-05	0.00106945	yes	down	5.18	7.77	4.86	4.76	1.03	1.62	2.49	3.45	1.15
ENSRNOG00000049272	AABR07048303.1	-	0.094	-3.41329	4.8231e-05	0.00107072	yes	down	1.97	7.83	3.61	4.55	0.5	0.92	0	0.82	0
ENSRNOG00000011696	Lifr	LIF receptor subunit alpha [Source:RGD Symbol;Acc:621431]	0.153	-2.70994	4.83059e-05	0.00107072	yes	down	4.98	8.6	6.99	4.14	0.36	0.32	0	17.18	0.09
ENSRNOG00000008917	Ehbp1	EH domain binding protein 1 [Source:RGD Symbol;Acc:1310604]	0.432	-1.21001	4.92876e-05	0.0010874	yes	down	3.14	10.87	10.35	7.87	1.35	2.23	1.86	2.94	1.49
ENSRNOG00000047194	Arl13b	ADP-ribosylation factor like GTPase 13B [Source:RGD Symbol;Acc:1584979]	0.394	-1.34356	4.97695e-05	0.00109661	yes	down	9.46	14.36	9.74	9.32	3.67	4.7	5.15	7.98	3.82
ENSRNOG00000012324	Soga3	SOGA family member 3 [Source:RGD Symbol;Acc:11479453]	0.322	-1.6357	5.04862e-05	0.00111096	yes	down	2.84	8.59	7.68	3.27	1.01	0.83	1.15	2.49	0.87
ENSRNOG00000020774	LOC103690163	zinc finger protein 420 [Source:RGD Symbol;Acc:9421075]	0.219	-2.19254	5.06909e-05	0.00111402	yes	down	5.47	17.73	14.37	11.51	1	0.86	2.48	6.66	1.69
ENSRNOG00000056716	Zbtb20	zinc finger and BTB domain containing 20 [Source:RGD Symbol;Acc:1560387]	0.404	-1.30742	5.08802e-05	0.00111673	yes	down	45.75	93.78	84.39	65.92	22.81	43.48	16.18	51.3	15.21
ENSRNOG00000003714	Clk4	CDC-like kinase 4 [Source:RGD Symbol;Acc:1310274]	0.401	-1.31948	5.10202e-05	0.00111836	yes	down	9.4	21.71	14.63	14.75	4.74	5.22	7.39	5.73	4.63
ENSRNOG00000046741	Itsn2	intersectin 2 [Source:RGD Symbol;Acc:1590890]	0.459	-1.12498	5.12331e-05	0.00112157	yes	down	9.2	12.09	10.48	11.78	4.47	2.49	4.76	4.84	3.51
ENSRNOG00000013383	Tmub1	transmembrane and ubiquitin-like domain containing 1 [Source:RGD Symbol;Acc:735120]	2.533	1.34074	5.18402e-05	0.0011334	yes	up	20.76	19.98	21.4	23.84	32.49	49.29	71.89	39.08	57.87
ENSRNOG00000007125	Vps54	VPS54 subunit of GARP complex [Source:RGD Symbol;Acc:628718]	0.457	-1.13128	5.27215e-05	0.00114819	yes	down	2.26	5.18	4.59	4.37	1.64	1.35	1.09	2.11	1.52
ENSRNOG00000015529	Cdca3	cell division cycle associated 3 [Source:RGD Symbol;Acc:1359093]	3.631	1.86029	5.27873e-05	0.00114819	yes	up	1.99	2.42	0.54	3.44	4.98	8.64	7.75	4.69	7.3
ENSRNOG00000061854	AC113837.9	-	0.141	-2.82639	5.28667e-05	0.00114845	yes	down	2.09	3.47	3.04	1.34	0.51	0.38	0	0.69	0.23
ENSRNOG00000008463	Rundc3b	RUN domain containing 3B [Source:RGD Symbol;Acc:1587590]	0.255	-1.96974	5.44163e-05	0.0011806	yes	down	1.31	2	1.01	3.78	0.4	0.34	0.66	0.53	0.22
ENSRNOG00000015501	Ddhd2	DDHD domain containing 2 [Source:RGD Symbol;Acc:1585818]	0.419	-1.25358	5.44915e-05	0.00118072	yes	down	5.98	13.04	10.12	7.98	3.82	4.77	2.7	5.87	1.76
ENSRNOG00000056010	AABR07056817.1	-	0.118	-3.08412	5.48412e-05	0.00118678	yes	down	0.26	7.4	8.37	14.02	0.03	0	0.63	19.8	11.14
ENSRNOG00000005908	Dmtf1	cyclin D binding myb-like transcription factor 1 [Source:RGD Symbol;Acc:70966]	0.47	-1.0892	5.55855e-05	0.00119744	yes	down	8.95	13.54	12.28	12.84	4.86	7.93	2.62	7.57	2.32
ENSRNOG00000016708	Necab3	N-terminal EF-hand calcium binding protein 3 [Source:RGD Symbol;Acc:1310124]	3.329	1.73509	5.55932e-05	0.00119744	yes	up	1.69	2.62	1.63	1.34	2.3	5.55	1.99	5.4	7.46
ENSRNOG00000060514	LOC103692166	WD repeat-containing protein 54 [Source:RGD Symbol;Acc:9477816]	2.45	1.29294	5.56114e-05	0.00119744	yes	up	26.96	17.99	20.98	36.77	47.88	70.11	74.58	57.74	43.8
ENSRNOG00000055867	AC105577.1	-	0.159	-2.64971	5.56162e-05	0.00119744	yes	down	0.46	1.03	0.72	0.53	0.08	0.17	0.07	0.23	0
ENSRNOG00000006523	Atl2	atlastin GTPase 2 [Source:RGD Symbol;Acc:1305125]	0.439	-1.18752	5.72067e-05	0.00122857	yes	down	8.42	17.27	11.82	13.31	2.67	4.95	4.21	5.7	3.17
ENSRNOG00000012379	Wdr18	WD repeat domain 18 [Source:RGD Symbol;Acc:1310646]	2.873	1.52271	5.7926e-05	0.00124244	yes	up	40.06	36.64	37.52	47.74	65.01	81.11	166.15	67.71	110.97
ENSRNOG00000011341	Rictor	RPTOR independent companion of MTOR, complex 2 [Source:RGD Symbol;Acc:1307224]	0.394	-1.34442	5.82526e-05	0.00124669	yes	down	3.55	2.59	1.51	4	1.68	0.87	0.73	1.48	0.77
ENSRNOG00000003936	Pwwp2a	PWWP domain containing 2A [Source:RGD Symbol;Acc:1305891]	0.42	-1.24995	5.84158e-05	0.00124669	yes	down	6.27	9.59	5.92	7.45	2.75	3.69	0.81	6.2	2.57
ENSRNOG00000001692	Chaf1b	chromatin assembly factor 1 subunit B [Source:RGD Symbol;Acc:1307634]	3.072	1.61922	5.84181e-05	0.00124669	yes	up	0.79	1.55	0.99	1.89	1.89	4.06	4.05	4.36	4.09
ENSRNOG00000011307	Slmap	sarcolemma associated protein [Source:RGD Symbol;Acc:1307674]	0.493	-1.02022	5.85073e-05	0.00124703	yes	down	11.33	13.61	11.79	13.21	6.76	5.22	3.55	10.03	3.62
ENSRNOG00000014599	Dhx36	DEAH-box helicase 36 [Source:RGD Symbol;Acc:1308767]	0.428	-1.2228	5.90508e-05	0.00125703	yes	down	13.17	25.34	20.54	13.7	7.09	7.7	14.07	10.89	4.4
ENSRNOG00000016316	Mcm2	minichromosome maintenance complex component 2 [Source:RGD Symbol;Acc:1305577]	2.198	1.13626	5.92139e-05	0.00125893	yes	up	2.81	3.81	3.05	3.91	5.76	9.21	3.24	10.23	7.66
ENSRNOG00000037452	AABR07042542.1	-	0.021	-5.56234	5.95037e-05	0.00126254	yes	down	0.99	0.62	0.27	0.56	0	0	0	0	0.04
ENSRNOG00000018011	Tasor2	transcription activation suppressor family member 2 [Source:RGD Symbol;Acc:1564456]	0.389	-1.36278	5.96065e-05	0.00126254	yes	down	1.96	3.04	2.3	1.1	1.05	0.78	0.52	1.43	0.4
ENSRNOG00000020531	Fen1	flap structure-specific endonuclease 1 [Source:RGD Symbol;Acc:621821]	2.576	1.3653	5.96072e-05	0.00126254	yes	up	2.65	2.13	3.89	3.09	4.29	6.51	8.06	9.74	7.65
ENSRNOG00000012543	Mcm3	minichromosome maintenance complex component 3 [Source:RGD Symbol;Acc:1305168]	3.199	1.67765	5.9946e-05	0.00126813	yes	up	0.98	1.55	0.36	1.23	2.45	3.34	1.44	4.23	4.19
ENSRNOG00000015389	Stag1	stromal antigen 1 [Source:RGD Symbol;Acc:1310744]	0.454	-1.13905	6.02105e-05	0.00127214	yes	down	3.38	4.94	3.57	3.64	2	1.42	2.03	1.55	1.22
ENSRNOG00000007853	Prdm10	PR/SET domain 10 [Source:RGD Symbol;Acc:1560384]	0.42	-1.24992	6.12147e-05	0.00129153	yes	down	3.26	6.17	9.38	3.76	2.41	0.74	8.09	1.7	1.76
ENSRNOG00000022847	Dop1a	DOP1 leucine zipper like protein A [Source:RGD Symbol;Acc:1305534]	0.458	-1.12769	6.12802e-05	0.00129153	yes	down	8.45	15.89	12.67	10.36	7.04	5.84	4.03	9.72	3.06
ENSRNOG00000046635	Cdca5	cell division cycle associated 5 [Source:RGD Symbol;Acc:1560863]	11.205	3.48607	6.23188e-05	0.00131179	yes	up	0	0.12	0.05	0.15	0.46	0.83	0.33	1.3	0.86
ENSRNOG00000052384	AABR07006672.1	-	0.016	-6.01014	6.25884e-05	0.00131535	yes	down	0.54	1.06	1.46	0.4	0	0	0	0.03	0
ENSRNOG00000005652	Cntn4	contactin 4 [Source:RGD Symbol;Acc:621361]	0.096	-3.37705	6.26979e-05	0.00131535	yes	down	0.8	0.65	0.96	11.91	0.05	0.1	0	0.06	0
ENSRNOG00000008945	Nans	N-acetylneuraminate synthase [Source:RGD Symbol;Acc:1311943]	2.257	1.17435	6.27204e-05	0.00131535	yes	up	18.51	12.86	11.17	17.54	24.66	32.88	25.64	28.55	45.43
ENSRNOG00000052945	AABR07002969.1	-	2.257	1.17467	6.30324e-05	0.00131737	yes	up	44.42	43.14	51.5	54.14	67.05	112.98	121.68	83.67	112.29
ENSRNOG00000006103	Tbc1d31	TBC1 domain family, member 31 [Source:RGD Symbol;Acc:1587370]	0.407	-1.29617	6.3057e-05	0.00131737	yes	down	2.69	7.55	4.82	3.49	1.29	1.9	2.37	1.35	1.33
ENSRNOG00000053541	Kansl2	KAT8 regulatory NSL complex subunit 2 [Source:RGD Symbol;Acc:1303127]	2.098	1.06893	6.35467e-05	0.00132449	yes	up	9.04	8.63	7.1	10.57	14.46	15.62	20.63	19.98	19.19
ENSRNOG00000011614	Tmcc1	transmembrane and coiled-coil domain family 1 [Source:RGD Symbol;Acc:1311909]	0.488	-1.03619	6.40523e-05	0.00133112	yes	down	6.82	7.2	6.65	4.08	3.86	3.65	2.65	5.54	2.77
ENSRNOG00000053868	AABR07017237.2	-	0.027	-5.20398	6.41005e-05	0.00133112	yes	down	1.18	3.16	1.61	0.96	0	0.12	0.1	0	0
ENSRNOG00000003088	Arhgap31	Rho GTPase activating protein 31 [Source:RGD Symbol;Acc:1306093]	0.325	-1.62208	6.49745e-05	0.00134762	yes	down	5.34	12.74	9.55	8.33	3.51	1.48	1.46	4.42	0.93
ENSRNOG00000042951	Xrn1	5'-3' exoribonuclease 1 [Source:RGD Symbol;Acc:1309713]	0.34	-1.55784	6.60157e-05	0.00136755	yes	down	3	7.17	6.28	3.16	0.92	1.27	0.34	2.06	0.36
ENSRNOG00000059601	AC127076.2	-	0.022	-5.49347	6.65401e-05	0.00137673	yes	down	0.38	0.85	0.55	0.84	0	0	0	0.07	0
ENSRNOG00000028329	Zfp438	zinc finger protein 438 [Source:RGD Symbol;Acc:1307214]	0.379	-1.39829	6.67258e-05	0.00137889	yes	down	6.52	10.87	7.04	4.23	2.77	1.34	1.2	3.47	1.56
ENSRNOG00000049560	Glul	glutamate-ammonia ligase [Source:RGD Symbol;Acc:2710]	2.13	1.09103	6.69347e-05	0.00138153	yes	up	474.58	529.17	434.82	636.46	746.07	1333.25	1404.58	774.61	1527.41
ENSRNOG00000017163	Pfkp	phosphofructokinase, platelet [Source:RGD Symbol;Acc:61893]	2.18	1.12417	6.7527e-05	0.00139206	yes	up	6.07	6.97	7.75	7.19	8.16	19.53	13.95	15.57	14.53
ENSRNOG00000008124	Ints8	integrator complex subunit 8 [Source:RGD Symbol;Acc:1310592]	0.474	-1.07613	6.80148e-05	0.00139702	yes	down	8.84	9.97	10.28	7.62	2.85	5.42	4.04	4.22	3.05
ENSRNOG00000010608	Cep162	centrosomal protein 162 [Source:RGD Symbol;Acc:1307365]	0.413	-1.27532	6.82473e-05	0.0014001	yes	down	1.02	1.42	0.85	1.14	0.43	0.62	0.33	0.55	0.3
ENSRNOG00000052854	AABR07014132.1	-	0.129	-2.9545	6.86695e-05	0.00140536	yes	down	0.6	0.7	0.66	0.07	0.04	0.06	0.03	0.14	0.07
ENSRNOG00000007457	Serping1	serpin family G member 1 [Source:RGD Symbol;Acc:735225]	2.05	1.03558	6.95167e-05	0.00142099	yes	up	144.09	92.11	105.58	195.05	247.84	238.34	191.3	326.46	300.02
ENSRNOG00000000422	Dxo	decapping exoribonuclease [Source:RGD Symbol;Acc:1303267]	2.175	1.12093	6.96243e-05	0.00142148	yes	up	7.55	10.83	6.89	8.87	14.84	16.26	19.1	14.68	19.46
ENSRNOG00000053968	AABR07019086.1	-	0.403	-1.30974	7.03319e-05	0.00143349	yes	down	3.91	7.61	4.81	6.01	2.76	2.5	1.02	4.08	1.5
ENSRNOG00000027317	Ylpm1	YLP motif containing 1 [Source:RGD Symbol;Acc:1564946]	0.476	-1.0716	7.06023e-05	0.00143626	yes	down	3.24	4.34	3.2	3.04	2.45	1.52	1.5	2.34	1.12
ENSRNOG00000061845	Cttnbp2	cortactin binding protein 2 [Source:RGD Symbol;Acc:628691]	0.316	-1.66154	7.11684e-05	0.00144604	yes	down	8	15.81	8.19	4.67	2.81	1.38	3.34	4.15	1.19
ENSRNOG00000018865	Adamts12	ADAM metallopeptidase with thrombospondin type 1 motif, 12 [Source:RGD Symbol;Acc:1307323]	0.354	-1.49658	7.13403e-05	0.0014478	yes	down	1.16	2.41	3	1.61	0.44	0.72	0.79	0.44	0.51
ENSRNOG00000042309	Kiaa0408L	Kiaa0408-like [Source:RGD Symbol;Acc:1307525]	0.428	-1.22598	7.24282e-05	0.00146812	yes	down	4.55	8.81	5.65	5.24	2.46	1.92	1.74	4.46	1.27
ENSRNOG00000018322	Picalm	phosphatidylinositol binding clathrin assembly protein [Source:RGD Symbol;Acc:621054]	0.419	-1.25543	7.25965e-05	0.00146978	yes	down	22.94	39.36	29.06	22.11	9.37	10.42	18.38	15.8	8.05
ENSRNOG00000002841	Cdc42bpa	CDC42 binding protein kinase alpha [Source:RGD Symbol;Acc:621406]	0.372	-1.42708	7.32381e-05	0.001481	yes	down	10.31	16.34	11.49	9.63	4.38	2.4	3.37	9.12	1.72
ENSRNOG00000010891	Lrrcc1	leucine rich repeat and coiled-coil centrosomal protein 1 [Source:RGD Symbol;Acc:628722]	0.461	-1.11685	7.38017e-05	0.00148885	yes	down	4.33	5.63	3.18	4.53	2.19	2.67	1.8	3.37	2.26
ENSRNOG00000038044	Tsc22d2	TSC22 domain family, member 2 [Source:RGD Symbol;Acc:1593169]	0.429	-1.2204	7.43941e-05	0.00149655	yes	down	1.63	3.11	1.75	2.36	0.84	0.76	0.97	0.91	0.76
ENSRNOG00000052775	RGD1305938	similar to expressed sequence AW549877 [Source:RGD Symbol;Acc:1305938]	0.47	-1.08805	7.45685e-05	0.00149719	yes	down	10.51	10.49	8.76	8.58	5.18	4.39	3.58	7.57	2.37
ENSRNOG00000011194	Tpp2	tripeptidyl peptidase 2 [Source:RGD Symbol;Acc:621584]	0.443	-1.17382	7.5036e-05	0.00150302	yes	down	5.15	5.63	4.05	5.65	2.75	1.85	1.5	3.71	1.03
ENSRNOG00000003882	Cep350	centrosomal protein 350 [Source:RGD Symbol;Acc:621162]	0.476	-1.07108	7.52448e-05	0.00150353	yes	down	1.94	2.3	1.85	1.21	0.9	0.68	0.8	1.23	0.57
ENSRNOG00000012404	Thrsp	thyroid hormone responsive [Source:RGD Symbol;Acc:3859]	2.644	1.40284	7.5327e-05	0.00150353	yes	up	36.44	60.05	55	22.47	62.5	87.98	125.85	130.42	123.39
ENSRNOG00000019575	Rell2	RELT-like 2 [Source:RGD Symbol;Acc:1305276]	4.43	2.14746	7.5795e-05	0.00151109	yes	up	0.3	0.4	0.44	0.17	1.51	1.34	1.8	1.42	1.27
ENSRNOG00000014515	Cdc14a	cell division cycle 14A [Source:RGD Symbol;Acc:1304649]	0.461	-1.11711	7.73937e-05	0.00154115	yes	down	7.45	8.34	6.35	10.71	4.82	2.81	3.49	4.28	2.25
ENSRNOG00000043357	Zfp407	zinc finger protein 407 [Source:RGD Symbol;Acc:1310645]	0.283	-1.82175	7.76805e-05	0.00154386	yes	down	1.47	10.31	4.73	5.77	1.42	1.21	0.18	1.42	0.26
ENSRNOG00000019946	Gmppa	GDP-mannose pyrophosphorylase A [Source:RGD Symbol;Acc:1560644]	2.226	1.15465	7.77118e-05	0.00154386	yes	up	16.88	14.6	18.14	21.35	28.51	40.87	33.98	28.44	49.71
ENSRNOG00000015440	Wrn	WRN RecQ like helicase [Source:RGD Symbol;Acc:1564788]	0.388	-1.3677	7.78305e-05	0.00154441	yes	down	4.18	4.1	4.35	3.66	0.74	0.48	0.37	1.38	0.5
ENSRNOG00000001440	Mdh2	malate dehydrogenase 2 [Source:RGD Symbol;Acc:619719]	2.394	1.2594	7.81611e-05	0.00154916	yes	up	127.52	121.22	129.94	143.15	225.21	259.7	400.08	200.97	313.43
ENSRNOG00000018991	Gsn	gelsolin [Source:RGD Symbol;Acc:1303089]	2.14	1.09742	7.86763e-05	0.00155755	yes	up	356.29	253.12	330.98	480.23	475.64	840.18	459.43	975.25	884.54
ENSRNOG00000008062	Dqx1	DEAQ box RNA-dependent ATPase 1 [Source:RGD Symbol;Acc:1591766]	0.259	-1.95089	8.04204e-05	0.00158837	yes	down	0.84	1.34	1.33	1.53	0.55	0.28	0.28	0.3	0.15
ENSRNOG00000052409	AABR07050317.1	-	0.028	-5.16241	8.07215e-05	0.00159247	yes	down	1.3	3.11	3.33	1.31	0.15	0	0	0.18	0
ENSRNOG00000011987	Cd2ap	CD2-associated protein [Source:RGD Symbol;Acc:727803]	0.471	-1.08495	8.08197e-05	0.00159255	yes	down	11.3	11.07	7.89	10.78	4.08	5.93	3.27	7.65	2.56
ENSRNOG00000021553	Nckap5	NCK-associated protein 5 [Source:RGD Symbol;Acc:1564507]	0.267	-1.90296	8.13157e-05	0.00159989	yes	down	6.13	6.84	7.83	5.73	0.61	0.56	0.9	1.1	1.71
ENSRNOG00000036942	Tnfrsf9	TNF receptor superfamily member 9 [Source:RGD Symbol;Acc:1598208]	2.352	1.23376	8.13807e-05	0.00159989	yes	up	7.1	9.66	7.74	12.64	11.79	20.92	17.66	37.8	18.69
ENSRNOG00000052802	Aldoa	aldolase, fructose-bisphosphate A [Source:RGD Symbol;Acc:2089]	2.777	1.47349	8.32009e-05	0.00163243	yes	up	747.18	485.91	459.34	774.41	1011.7	1384.52	2492.72	1095.24	1469.38
ENSRNOG00000033792	RGD1565622	RGD1565622 [Source:RGD Symbol;Acc:1565622]	0.248	-2.00962	8.32283e-05	0.00163243	yes	down	1.66	2.94	2.69	1.77	0.22	0.44	0.33	1.61	0.3
ENSRNOG00000001956	Dzip3	DAZ interacting zinc finger protein 3 [Source:RGD Symbol;Acc:1563278]	0.326	-1.61633	8.55085e-05	0.00167328	yes	down	6.73	11.88	7.02	6.85	2.17	3.57	0.91	4.76	0.99
ENSRNOG00000048747	Cdk5rap3	CDK5 regulatory subunit associated protein 3 [Source:RGD Symbol;Acc:620002]	2.021	1.01509	8.5691e-05	0.00167425	yes	up	56.76	45.28	48.23	51.39	68.46	125.59	96.78	84.68	100.29
ENSRNOG00000057622	Rbm41	RNA binding motif protein 41 [Source:RGD Symbol;Acc:1590579]	0.322	-1.6334	8.57552e-05	0.00167425	yes	down	3.1	3.4	1.8	1.32	0.75	0.75	0.21	1.47	0.6
ENSRNOG00000058814	7SK	7SK RNA [Source:RFAM;Acc:RF00100]	0.241	-2.0513	8.86683e-05	0.00172578	yes	down	2.52	2.03	1.27	2.79	0.2	0.41	0.71	0.44	0.57
ENSRNOG00000007917	Cd46	CD46 molecule [Source:RGD Symbol;Acc:3061]	0.209	-2.25694	8.86996e-05	0.00172578	yes	down	0.99	4.02	2.98	3.48	0.47	0.52	0.3	0.88	0.36
ENSRNOG00000030247	Eif4ebp3	eukaryotic translation initiation factor 4E binding protein 3 [Source:RGD Symbol;Acc:2324556]	0.438	-1.19136	8.90241e-05	0.00173011	yes	down	20.85	19.84	21.97	25.5	15	12.89	6.51	14.43	15.14
ENSRNOG00000020505	Map4k1	mitogen activated protein kinase kinase kinase kinase 1 [Source:RGD Symbol;Acc:1305463]	2.518	1.33252	9.0402e-05	0.00175487	yes	up	10.5	8.39	5.45	7.77	16.5	12.73	14.71	11.68	28.59
ENSRNOG00000025071	Qrich1	glutamine-rich 1 [Source:RGD Symbol;Acc:1311095]	0.237	-2.07647	9.05265e-05	0.00175528	yes	down	5.02	7.66	9.92	4.18	1.24	0.8	0.58	1.88	0.19
ENSRNOG00000029971	Mt-nd5	mitochondrially encoded NADH dehydrogenase 5 [Source:RGD Symbol;Acc:620560]	0.427	-1.22646	9.07565e-05	0.00175773	yes	down	809.41	744.27	484.22	794.05	472.92	225.12	202.92	433.97	139.31
ENSRNOG00000000723	RT1-CE5	RT1 class I, locus CE5 [Source:RGD Symbol;Acc:1595868]	2.595	1.37548	9.11828e-05	0.00176398	yes	up	243.48	184.49	174.18	471.02	403.53	482.15	503.01	322.31	813.09
ENSRNOG00000011258	Masp2	mannan-binding lectin serine peptidase 2 [Source:RGD Symbol;Acc:620214]	0.046	-4.4485	9.22368e-05	0.00178233	yes	down	0.17	1.08	0.54	0.43	0.03	0	0.02	0.3	0
ENSRNOG00000000796	Ranbp2	RAN binding protein 2 [Source:RGD Symbol;Acc:1560047]	0.396	-1.33772	9.31578e-05	0.00179808	yes	down	5.36	6.37	5.15	5.79	1.39	1.87	2.88	3.39	0.99
ENSRNOG00000056507	AABR07064613.2	-	0.078	-3.6719	9.35031e-05	0.0018027	yes	down	1.81	3.16	2.71	2.42	0.14	0.77	0.06	0	0
ENSRNOG00000000692	Ung	uracil-DNA glycosylase [Source:RGD Symbol;Acc:1307200]	2.524	1.33555	9.39829e-05	0.00180989	yes	up	5.82	4.26	5.05	5.96	7.41	12.95	13.98	9.97	16.32
ENSRNOG00000018946	Trim33	tripartite motif-containing 33 [Source:RGD Symbol;Acc:1307339]	0.431	-1.21514	9.58996e-05	0.00184262	yes	down	5.45	5.99	3.53	15.7	6.24	1.41	1.75	3.34	1.12
ENSRNOG00000011241	Tfdp2	transcription factor Dp-2 [Source:RGD Symbol;Acc:1305814]	0.499	-1.00308	9.78419e-05	0.00187569	yes	down	8.76	9.67	8.89	11.08	3.48	5.44	4.89	5.88	3.74
ENSRNOG00000052187	SNORD116	Small nucleolar RNA SNORD116 [Source:RFAM;Acc:RF00108]	0.069	-3.86607	9.8161e-05	0.00187968	yes	down	1.74	5.11	3.86	4.46	0	0.59	0	0.21	0.5
ENSRNOG00000009617	Exoc7	exocyst complex component 7 [Source:RGD Symbol;Acc:620236]	2.002	1.00131	9.87892e-05	0.00188958	yes	up	15.04	12.99	10.52	18.1	22.46	31.98	33.71	25.89	27.92
ENSRNOG00000061917	AABR07042840.1	-	0.225	-2.1496	9.98888e-05	0.00190631	yes	down	2.33	3.99	8.75	6.4	0.7	1.58	0.76	3.81	0.62
ENSRNOG00000022597	Cenpj	centromere protein J [Source:RGD Symbol;Acc:1310464]	0.361	-1.4711	0.000100426	0.00191442	yes	down	1.01	1.85	0.9	1.04	0.47	0.33	0.21	0.69	0.44
ENSRNOG00000010906	Ccl5	C-C motif chemokine ligand 5 [Source:RGD Symbol;Acc:69069]	5.108	2.35288	0.000100812	0.00191848	yes	up	26.08	16.1	17.25	26.73	23.43	38.84	93.63	48.09	276.31
ENSRNOG00000012397	Zmym4	zinc finger MYM-type containing 4 [Source:RGD Symbol;Acc:1309545]	0.439	-1.18783	0.000100866	0.00191848	yes	down	5.58	10.93	7.74	7.12	1.56	1.51	2.11	4.02	1.24
ENSRNOG00000054338	AC094221.4	-	0.067	-3.90266	0.00010145	0.00192744	yes	down	0.27	1.32	1.32	0.57	0.11	0	0	0.21	0
ENSRNOG00000042274	Fbxo31	F-box protein 31 [Source:RGD Symbol;Acc:1561069]	2.037	1.02651	0.000101721	0.00193042	yes	up	31.56	40.57	45.69	32.77	49.97	73.47	81.96	78.71	65.13
ENSRNOG00000024809	Ntmt1	N-terminal Xaa-Pro-Lys N-methyltransferase 1 [Source:RGD Symbol;Acc:1306582]	2.057	1.04029	0.000102967	0.00195189	yes	up	21.34	20.71	20.14	24.02	32.37	42.85	47.51	38.86	51.34
ENSRNOG00000050318	Fsd1	fibronectin type 3 and SPRY domain-containing protein [Source:MGI Symbol;Acc:MGI:1934858]	2.003	1.00203	0.000103342	0.0019568	yes	up	7.27	8.22	6.82	9.67	11.44	18.32	16.87	16.94	15.67
ENSRNOG00000004777	Esf1	ESF1 nucleolar pre-rRNA processing protein homolog [Source:RGD Symbol;Acc:1306067]	0.498	-1.00472	0.000104708	0.00198046	yes	down	9.92	12.58	9.75	11.25	4.01	5	5.76	7.29	3.34
ENSRNOG00000053406	Gramd1c	GRAM domain containing 1C [Source:RGD Symbol;Acc:1305433]	0.309	-1.69489	0.000106389	0.00201001	yes	down	6.43	9.64	16.04	10.78	1.41	2.17	2.22	6.51	1.27
ENSRNOG00000016620	Csnk1g1	casein kinase 1, gamma 1 [Source:RGD Symbol;Acc:621404]	0.088	-3.51453	0.000106845	0.00201639	yes	down	1.67	3.76	2.44	1.93	0.04	0	0	0.69	0.38
ENSRNOG00000001346	Cops6	COP9 signalosome subunit 6 [Source:RGD Symbol;Acc:1309919]	2.188	1.12942	0.000107073	0.00201844	yes	up	200.97	158.34	194.81	198.83	287.79	402.64	470.11	294.57	418.87
ENSRNOG00000029986	Insr	insulin receptor [Source:RGD Symbol;Acc:2917]	0.253	-1.98328	0.000108906	0.00204391	yes	down	2.17	3.89	6.26	6.98	1.16	0.42	0.07	1.03	0.13
ENSRNOG00000049378	AABR07062583.1	DENN domain containing 5B [Source:NCBI gene;Acc:100365679]	0.338	-1.56465	0.000110512	0.00207043	yes	down	1.83	2.57	2.57	4.57	1.63	1.39	1.51	1.42	0.87
ENSRNOG00000021669	Mybl1	MYB proto-oncogene like 1 [Source:RGD Symbol;Acc:1306940]	0.434	-1.20494	0.000110668	0.00207043	yes	down	17.77	20.32	22.63	26.47	16.13	18.63	59.4	23.43	29.25
ENSRNOG00000051570	AABR07001910.1	-	0.301	-1.73043	0.000112323	0.00209415	yes	down	1.03	4.9	3.44	4.7	3.25	0.55	1.53	1.26	0.72
ENSRNOG00000043037	Zfp770	zinc finger protein 770 [Source:RGD Symbol;Acc:1597283]	0.425	-1.23407	0.000114254	0.00212315	yes	down	2.13	3.97	3	2.7	1.27	1.1	1.15	1.9	0.59
ENSRNOG00000021525	Nbeal1	neurobeachin-like 1 [Source:RGD Symbol;Acc:1594799]	0.374	-1.41972	0.0001146	0.00212551	yes	down	16.27	30.5	23.69	23.38	6.22	7.12	18.27	9.99	6.17
ENSRNOG00000014549	Arhgef26	Rho guanine nucleotide exchange factor 26 [Source:RGD Symbol;Acc:1562559]	0.377	-1.40871	0.000116275	0.00215363	yes	down	19.18	15.77	30.13	7.32	1.39	1.31	0.52	2.81	0.89
ENSRNOG00000011058	Utrn	utrophin [Source:RGD Symbol;Acc:3947]	0.424	-1.2377	0.000116861	0.00216213	yes	down	8.8	8.83	8	8.62	2.7	3.55	1.04	7.03	1.57
ENSRNOG00000049497	Eif6	eukaryotic translation initiation factor 6 [Source:RGD Symbol;Acc:1305373]	2.217	1.14852	0.000117034	0.00216297	yes	up	80.65	69.7	69.04	85.99	110.02	156.36	203.09	127.45	171.52
ENSRNOG00000009403	Dcaf17	DDB1 and CUL4 associated factor 17 [Source:RGD Symbol;Acc:1565551]	0.368	-1.44229	0.000117314	0.00216578	yes	down	2.7	3.23	2.12	2.12	1.11	0.62	0.91	0.91	0.79
ENSRNOG00000013397	Foxo1	forkhead box O1 [Source:RGD Symbol;Acc:620283]	0.398	-1.33018	0.000118106	0.00217803	yes	down	4.8	7.02	5.93	6.65	4.23	2.89	1.04	5.07	1.91
ENSRNOG00000004161	Mtif2	mitochondrial translational initiation factor 2 [Source:RGD Symbol;Acc:1303046]	0.419	-1.2564	0.000119333	0.00219826	yes	down	2.05	4.72	4.18	4.15	2.01	1.83	1.34	1.84	1.05
ENSRNOG00000062186	AABR07047323.2	-	0.031	-5.03445	0.000120146	0.00220844	yes	down	0.7	1.3	0.55	1.08	0.06	0	0	0	0.06
ENSRNOG00000010536	Nr2c2	nuclear receptor subfamily 2, group C, member 2 [Source:RGD Symbol;Acc:3201]	0.309	-1.69461	0.000121021	0.00222212	yes	down	1.57	1.59	1.46	1.89	0.66	0.29	0.31	1.17	0.25
ENSRNOG00000047848	Cbr1	carbonyl reductase 1 [Source:RGD Symbol;Acc:2286]	0.3	-1.73635	0.000121616	0.00223064	yes	down	6.07	7.18	5	2.65	1.4	3.37	1.07	2.19	0.39
ENSRNOG00000011675	Zfp40	zinc finger protein 40 [Source:RGD Symbol;Acc:1593410]	0.275	-1.86135	0.000122081	0.00223434	yes	down	1.48	3.89	1.98	2.36	0.37	0.94	0.43	1.42	0.19
ENSRNOG00000054901	Rif1	replication timing regulatory factor 1 [Source:RGD Symbol;Acc:1562474]	0.233	-2.09862	0.000122232	0.00223469	yes	down	2.11	5.77	3.55	3.07	0.95	0.94	0.67	1.83	0.04
ENSRNOG00000032134	Uqcrc1	ubiquinol-cytochrome c reductase core protein 1 [Source:RGD Symbol;Acc:1303314]	2.389	1.25668	0.000122895	0.00224438	yes	up	176.41	153.5	168.92	186.47	263.33	389.86	495.3	246.95	449.39
ENSRNOG00000018796	Herpud1	homocysteine inducible ER protein with ubiquitin like domain 1 [Source:RGD Symbol;Acc:620818]	2.083	1.05864	0.000123311	0.00224715	yes	up	62.96	51.87	53.83	66.48	85.52	125.44	144.08	101.66	94.91
ENSRNOG00000019681	Pold1	DNA polymerase delta 1, catalytic subunit [Source:RGD Symbol;Acc:621839]	2.149	1.10372	0.000124169	0.00225597	yes	up	1.72	1.73	1.05	1.42	2.6	4.4	1.62	3.48	2.94
ENSRNOG00000001323	Zfp157	zinc finger protein 157 [Source:RGD Symbol;Acc:1359435]	0.416	-1.26514	0.000124194	0.00225597	yes	down	4.47	8.11	5.48	4.78	2.66	2.65	1.06	4.09	1.34
ENSRNOG00000000795	RT1-N3	RT1 class Ib, locus N3 [Source:RGD Symbol;Acc:1598370]	3.17	1.66459	0.000124894	0.00226625	yes	up	4.41	4.48	2.6	2.06	13.16	7.42	6.07	5.42	17.01
ENSRNOG00000028227	Pbrm1	polybromo 1 [Source:RGD Symbol;Acc:1565549]	0.464	-1.10742	0.000125752	0.00227939	yes	down	16.96	16.19	14.54	15.24	9.24	4.56	5.04	11.7	3.98
ENSRNOG00000037227	Yes1	YES proto-oncogene 1, Src family tyrosine kinase [Source:RGD Symbol;Acc:3977]	0.487	-1.03748	0.000125978	0.00228105	yes	down	4.43	8.38	4.94	5.41	2.25	2.99	2.62	4.01	1.64
ENSRNOG00000053201	Gpcpd1	glycerophosphocholine phosphodiesterase 1 [Source:RGD Symbol;Acc:735140]	0.464	-1.10862	0.000126766	0.00229042	yes	down	12.87	25.67	21.48	23.24	8.55	9.79	5.07	17.36	5.94
ENSRNOG00000053859	Ranbp6	RAN binding protein 6 [Source:RGD Symbol;Acc:1305165]	0.499	-1.00253	0.000128415	0.00231529	yes	down	5.7	5.9	3.62	4.16	2.02	2.09	2.27	2.77	2.15
ENSRNOG00000010390	Hmbs	hydroxymethylbilane synthase [Source:RGD Symbol;Acc:2801]	2.058	1.04148	0.000128782	0.00231945	yes	up	24.12	24.47	26.61	33.13	42.12	56.93	46.55	41.24	69.08
ENSRNOG00000016161	Lman2	lectin, mannose-binding 2 [Source:RGD Symbol;Acc:1308965]	2.562	1.35705	0.000130759	0.002352	yes	up	55.66	35.91	33.55	53.13	77.89	91.22	147.17	68.23	141.69
ENSRNOG00000001317	Zfp68	zinc finger protein 68 [Source:RGD Symbol;Acc:1310463]	0.455	-1.13697	0.00013212	0.00236951	yes	down	8.76	17.44	10.99	11	3.44	5.1	2.88	8.18	3.04
ENSRNOG00000017097	Lhpp	phospholysine phosphohistidine inorganic pyrophosphate phosphatase [Source:RGD Symbol;Acc:1359187]	2.106	1.07469	0.000132601	0.00237561	yes	up	49.57	43.65	39.11	38.3	59.54	84.41	110.22	85.47	71.32
ENSRNOG00000014452	Zfhx3	zinc finger homeobox 3 [Source:RGD Symbol;Acc:1560268]	0.357	-1.48791	0.000133071	0.00237896	yes	down	1.58	10.33	1.43	1.64	0.9	0.41	0.36	0.91	0.22
ENSRNOG00000014019	Tbc1d7	TBC1 domain family, member 7 [Source:RGD Symbol;Acc:1307661]	2.146	1.10152	0.000133208	0.00237896	yes	up	2.44	4.26	5.01	3.33	6.93	7.85	7.67	10.02	5.94
ENSRNOG00000008588	Batf	basic leucine zipper ATF-like transcription factor [Source:RGD Symbol;Acc:1304923]	7.764	2.95684	0.000133725	0.00238567	yes	up	0.24	0.46	0.71	0.08	2.13	1.83	1.14	1.81	6.31
ENSRNOG00000005561	Brinp1	BMP/retinoic acid inducible neural specific 1 [Source:RGD Symbol;Acc:708519]	0.347	-1.52508	0.000135302	0.00241128	yes	down	10.42	21.86	25.06	10.77	1.55	2.19	1.2	5.11	0.82
ENSRNOG00000029726	Gstm1	glutathione S-transferase mu 1 [Source:RGD Symbol;Acc:2755]	3.644	1.86535	0.00013577	0.00241201	yes	up	446.04	467.26	563.47	552.69	676.4	1286.5	3779.42	983.58	1099.36
ENSRNOG00000057227	LOC100363372	zinc finger protein 81 (HFZ20)-like [Source:RGD Symbol;Acc:2323171]	0.176	-2.50696	0.000136609	0.00242439	yes	down	1.14	1.54	1.12	1.08	0.03	0.21	0.03	0.67	0.2
ENSRNOG00000039745	Pm20d1	peptidase M20 domain containing 1 [Source:RGD Symbol;Acc:1564063]	3.051	1.60922	0.000137038	0.00242946	yes	up	0.53	0.93	0.63	1.31	1.78	1.86	1.41	2.79	4.22
ENSRNOG00000015140	Trmt13	tRNA methyltransferase 13 homolog [Source:RGD Symbol;Acc:1565211]	0.356	-1.49058	0.00013791	0.00244235	yes	down	6.9	12.9	8.15	8.26	2.83	2.51	5.76	3.38	2.96
ENSRNOG00000060369	AABR07015687.1	-	0.022	-5.51762	0.000138982	0.00245878	yes	down	0.19	1.7	0.76	0.72	0	0	0.05	0	0
ENSRNOG00000011566	Cecr2	CECR2, histone acetyl-lysine reader [Source:RGD Symbol;Acc:1564182]	0.197	-2.34359	0.000139209	0.00246022	yes	down	4.89	7.04	7.81	2.48	0.22	0.05	0.06	0.53	0.35
ENSRNOG00000002874	AABR07065078.1	-	0.357	-1.48757	0.000139923	0.00247028	yes	down	4.25	9.4	4.66	5.48	1.19	1.97	2.96	2.43	1.09
ENSRNOG00000042326	Smpdl3b	sphingomyelin phosphodiesterase, acid-like 3B [Source:RGD Symbol;Acc:1307458]	2.027	1.0191	0.00014084	0.00248157	yes	up	2.17	2.14	1.8	2.31	2.9	4.8	2.45	5.45	3.9
ENSRNOG00000007320	Fam3d	family with sequence similarity 3, member D [Source:RGD Symbol;Acc:1305512]	0.132	-2.91844	0.000141442	0.00248933	yes	down	0.91	2.07	4.37	0.91	0.1	0.73	0.18	0.28	0.08
ENSRNOG00000013376	Mvd	mevalonate diphosphate decarboxylase [Source:RGD Symbol;Acc:621292]	2.033	1.02338	0.000141986	0.0024963	yes	up	15.98	8.98	10.85	12.45	22.61	23.41	17.91	22.45	28.99
ENSRNOG00000013587	Fam135a	family with sequence similarity 135, member A [Source:RGD Symbol;Acc:1304927]	0.324	-1.62411	0.000143323	0.00251456	yes	down	4.02	4.68	3.47	3.18	0.91	1.12	1.73	2.11	0.36
ENSRNOG00000013692	Abhd18	abhydrolase domain containing 18 [Source:RGD Symbol;Acc:1563987]	0.18	-2.47607	0.000143469	0.00251456	yes	down	1.75	5.07	5.28	4.27	0.47	0.54	0	1.48	0.41
ENSRNOG00000014852	Fbxo30	F-box protein 30 [Source:RGD Symbol;Acc:1359367]	0.37	-1.4344	0.00014383	0.00251829	yes	down	7.29	8.46	5.55	5.08	2.8	1.42	1.55	5.02	0.79
ENSRNOG00000058416	LOC103691556	mothers against decapentaplegic homolog 9 [Source:RGD Symbol;Acc:9309512]	0.129	-2.95357	0.000144407	0.00252578	yes	down	2.09	10.12	5.76	11.99	5.38	0	1.51	3.06	1.17
ENSRNOG00000014387	Chac1	ChaC glutathione-specific gamma-glutamylcyclotransferase 1 [Source:RGD Symbol;Acc:1307153]	4.746	2.24669	0.000144911	0.00252708	yes	up	0.27	1.37	0.25	0.23	2.73	2.19	2.55	2.38	1.49
ENSRNOG00000014248	Erbb4	erb-b2 receptor tyrosine kinase 4 [Source:RGD Symbol;Acc:620486]	0.327	-1.61337	0.000144928	0.00252708	yes	down	1.61	3	11.52	6.13	0.28	0.44	0.51	1.11	0.25
ENSRNOG00000047364	LOC687508	similar to Cytochrome c oxidase polypeptide VIIa-heart, mitochondrial precursor (Cytochrome c oxidase subunit VIIa-H) (COX VIIa-M) [Source:RGD Symbol;Acc:1584257]	0.317	-1.65819	0.000148688	0.00258733	yes	down	9.44	15.86	10.13	7.7	6.12	2.62	2.93	7.93	11.9
ENSRNOG00000012302	Gucy1a1	guanylate cyclase 1 soluble subunit alpha 1 [Source:RGD Symbol;Acc:68436]	0.248	-2.01334	0.000149792	0.00260387	yes	down	2.01	1.21	1.42	0.89	0.52	0.52	0.04	0.44	0.21
ENSRNOG00000057214	AABR07043510.1	-	0.268	-1.89781	0.000150856	0.002617	yes	down	0.63	1.28	1.2	0.87	0.2	0.3	0.33	0.36	0.08
ENSRNOG00000021886	B4galt7	beta-1,4-galactosyltransferase 7 [Source:RGD Symbol;Acc:1309214]	2.009	1.00631	0.000152342	0.00263739	yes	up	13.08	12.58	10.26	14.58	22.06	27.46	16.8	20.08	31.77
ENSRNOG00000033220	Oas1f	2 ' -5 ' oligoadenylate synthetase 1F [Source:RGD Symbol;Acc:1359647]	4.136	2.04837	0.000153586	0.00265375	yes	up	2.24	3.14	2.91	5.42	20.9	8.3	5.33	3.98	24.38
ENSRNOG00000054849	AABR07031388.1	-	0.022	-5.51661	0.00015398	0.0026576	yes	down	0.1	0.34	0.61	0.16	0	0	0	0	0.02
ENSRNOG00000016330	Rbm12b	RNA binding motif protein 12B [Source:RGD Symbol;Acc:1307658]	0.312	-1.68185	0.000155118	0.00267452	yes	down	5.8	9.31	16.12	4.18	3.42	1.98	3.9	5.32	2.43
ENSRNOG00000015090	Nubp2	nucleotide binding protein 2 [Source:RGD Symbol;Acc:1305113]	2.211	1.14485	0.000155627	0.00268058	yes	up	65.53	52.73	47.16	59.69	84.42	109.19	147.16	92.19	130.51
ENSRNOG00000009582	Rpe65	retinoid isomerohydrolase RPE65 [Source:RGD Symbol;Acc:621396]	0.358	-1.48115	0.000155985	0.0026813	yes	down	40.66	37.23	41.8	20.06	7	22.28	5.74	23.27	6.81
ENSRNOG00000032414	Tmem161b	transmembrane protein 161B [Source:RGD Symbol;Acc:1309660]	0.476	-1.07174	0.000159292	0.00273536	yes	down	10.31	13.74	7.49	8.67	3.06	5.51	4.75	4.98	3.68
ENSRNOG00000015426	Purg	purine-rich element binding protein G [Source:RGD Symbol;Acc:1305088]	0.306	-1.70945	0.000160778	0.0027581	yes	down	4.84	6.32	6.9	5.22	1.75	2.05	2.41	1.02	0.56
ENSRNOG00000020678	Ifi35	interferon-induced protein 35 [Source:RGD Symbol;Acc:1304553]	2.399	1.26217	0.000161826	0.00277327	yes	up	37.08	28.58	32.79	43.44	71.95	72.32	73.33	48.65	123.64
ENSRNOG00000050180	Zfpl1	zinc finger protein-like 1 [Source:RGD Symbol;Acc:1586738]	2.455	1.29591	0.000162536	0.00278258	yes	up	27.57	17.09	21.42	24.76	38.11	46.5	78.91	40.54	50.32
ENSRNOG00000042519	Peak1	pseudopodium-enriched atypical kinase 1 [Source:RGD Symbol;Acc:1312026]	0.462	-1.11276	0.000162738	0.00278258	yes	down	3.2	9.12	3.92	6.23	1.6	0.89	0.67	1.85	0.67
ENSRNOG00000003787	Lcorl	ligand dependent nuclear receptor corepressor-like [Source:RGD Symbol;Acc:1561241]	0.334	-1.58252	0.000163087	0.00278364	yes	down	7.78	17.18	8.01	6.51	2.37	1.2	7.51	4.43	2.52
ENSRNOG00000007437	Irf5	interferon regulatory factor 5 [Source:RGD Symbol;Acc:1310447]	2.047	1.03382	0.000164855	0.00281098	yes	up	5.83	6.08	5.76	6.02	12.98	11.42	5.44	15.74	14.39
ENSRNOG00000009812	Sbf2	SET binding factor 2 [Source:RGD Symbol;Acc:1588657]	0.498	-1.00564	0.000165394	0.00281735	yes	down	15.55	11.88	9.64	15.3	7.09	4.45	2.37	4.96	6.06
ENSRNOG00000030371	Mt-co2	mitochondrially encoded cytochrome c oxidase II [Source:RGD Symbol;Acc:621872]	0.411	-1.28205	0.000166375	0.00283122	yes	down	12475.7	11616.3	9327.7	12005.5	7833.88	4051.19	1460.07	6954.1	3061.18
ENSRNOG00000013668	Capg	capping actin protein, gelsolin like [Source:RGD Symbol;Acc:1311724]	2.177	1.12205	0.000167215	0.00284266	yes	up	128.84	105.46	141.41	248.14	215.4	325.5	281.29	402.63	390.06
ENSRNOG00000051592	AABR07044925.1	sirtuin 1 [Source:NCBI gene;Acc:309757]	0.353	-1.50301	0.000168316	0.00285701	yes	down	4.71	5.01	2.96	3.25	1.64	2.57	0.5	2.26	1.13
ENSRNOG00000055956	AABR07015078.1	-	0.124	-3.01537	0.000168399	0.00285701	yes	down	246.3	681.37	388.83	359.17	174.31	40.94	13.9	285.1	2.75
ENSRNOG00000016643	Lpcat2	lysophosphatidylcholine acyltransferase 2 [Source:RGD Symbol;Acc:2325051]	2.254	1.17276	0.000168565	0.00285701	yes	up	1.65	1.87	2.54	1.97	3.83	3.33	4.95	6.29	3.02
ENSRNOG00000038905	AABR07048397.1	-	0.103	-3.28481	0.000169928	0.00287724	yes	down	2.04	2.19	1.6	1.23	0.27	0	0	0.52	0.18
ENSRNOG00000007804	C1galt1	core 1 synthase, glycoprotein-N-acetylgalactosamine 3-beta-galactosyltransferase, 1 [Source:RGD Symbol;Acc:621105]	0.42	-1.25165	0.000170453	0.00288326	yes	down	5.48	10.26	6.64	6.94	3.26	2.75	2.71	4.86	2.71
ENSRNOG00000008450	LOC100359539	ribonucleotide reductase M2 polypeptide [Source:RGD Symbol;Acc:2323655]	2.792	1.48113	0.000172198	0.00290987	yes	up	1.01	1.84	0.61	1.61	3.92	5.34	1.65	3.49	2.44
ENSRNOG00000005307	Slc4a10	solute carrier family 4 member 10 [Source:RGD Symbol;Acc:631407]	0.112	-3.16061	0.000172433	0.00291094	yes	down	1.11	0.19	0.17	0.31	0.05	0.12	0	0.06	0.03
ENSRNOG00000021555	Mis18a	MIS18 kinetochore protein A [Source:RGD Symbol;Acc:1310778]	7.693	2.9436	0.000172744	0.0029133	yes	up	0.82	1.11	0.55	0.55	1.12	1.57	16.46	1.74	3.13
ENSRNOG00000017198	Hif3a	hypoxia inducible factor 3 subunit alpha [Source:RGD Symbol;Acc:70332]	0.07	-3.83711	0.000173178	0.00291771	yes	down	0.11	0.3	2.81	5.9	0.03	0.11	0.03	0.39	0.03
ENSRNOG00000002862	Clcn5	chloride voltage-gated channel 5 [Source:RGD Symbol;Acc:2362]	0.176	-2.50645	0.000173891	0.00292103	yes	down	3.13	9.84	7.44	8.41	2.91	0.93	0.78	1.92	0.22
ENSRNOG00000042720	Mrpl28	mitochondrial ribosomal protein L28 [Source:RGD Symbol;Acc:1583741]	2.465	1.30153	0.0001743	0.00292501	yes	up	89.91	87.15	92.25	95.83	122.82	206.89	286.3	139.39	246.66
ENSRNOG00000018994	Psmc4	proteasome 26S subunit, ATPase 4 [Source:RGD Symbol;Acc:621102]	2.225	1.15399	0.000174762	0.00292986	yes	up	106.44	94.98	93.44	103.94	133.56	218.32	265.81	158.19	226.66
ENSRNOG00000046192	LOC103690007	5-methylcytosine rRNA methyltransferase NSUN4 [Source:RGD Symbol;Acc:9205239]	2.456	1.2965	0.000175921	0.00294637	yes	up	3.68	2	1.71	2.59	6.35	6.44	2.78	7.97	6.28
ENSRNOG00000021237	RGD1565616	RGD1565616 [Source:RGD Symbol;Acc:1565616]	0.273	-1.87476	0.000176718	0.00295681	yes	down	5.69	14.93	12.28	8.55	2.77	2.21	0.54	7.01	1.07
ENSRNOG00000004585	Tmtc2	transmembrane O-mannosyltransferase targeting cadherins 2 [Source:RGD Symbol;Acc:1309848]	0.102	-3.2892	0.000176978	0.00295823	yes	down	4.61	9.68	10.14	0.77	0.26	0	0.44	1.12	0
ENSRNOG00000026907	Zbtb37	zinc finger and BTB domain containing 37 [Source:RGD Symbol;Acc:1308731]	0.112	-3.15967	0.000177488	0.00296383	yes	down	0.82	1.47	3.11	1.49	0	0.1	0.03	0.49	0.07
ENSRNOG00000005386	Kitlg	KIT ligand [Source:RGD Symbol;Acc:3086]	0.395	-1.33931	0.0001783	0.00297447	yes	down	8.96	5.39	2.65	5.33	3.36	2.49	0.73	2.78	1.31
ENSRNOG00000012733	Ankrd12	ankyrin repeat domain 12 [Source:RGD Symbol;Acc:1310118]	0.386	-1.37447	0.00017936	0.00298922	yes	down	4.23	6.07	4.18	3.78	0.77	1.67	2.19	2.17	0.84
ENSRNOG00000015857	Ctsa	cathepsin A [Source:RGD Symbol;Acc:1309070]	2.074	1.05242	0.000180793	0.00301015	yes	up	124.49	131.49	100.73	194.14	238.37	238.19	309.42	241.49	272.86
ENSRNOG00000052530	AABR07069008.1	-	0.422	-1.24542	0.000181803	0.00302398	yes	down	2.72	3.66	4.48	3.18	1.38	1.31	0.82	2.66	1.18
ENSRNOG00000016417	Zfp136	zinc finger protein 136 [Source:RGD Symbol;Acc:1565635]	0.29	-1.78672	0.000183353	0.00303885	yes	down	2.73	2.85	2.55	1.68	1.08	0.76	0.12	1.49	0.33
ENSRNOG00000009894	Vps50	VPS50 subunit of EARP/GARPII complex [Source:RGD Symbol;Acc:1304751]	0.404	-1.30615	0.000183413	0.00303885	yes	down	6.43	12.02	6.66	6.64	3.3	2.01	3.36	5.06	1.47
ENSRNOG00000017644	Usp6nl	USP6 N-terminal like [Source:RGD Symbol;Acc:1311786]	0.483	-1.04964	0.000183796	0.00304018	yes	down	3.92	9.93	6.17	8.98	2.63	2.17	1.03	2.88	1.73
ENSRNOG00000006570	Plekhg3	pleckstrin homology and RhoGEF domain containing G3 [Source:RGD Symbol;Acc:1308089]	0.473	-1.07949	0.000188064	0.00310379	yes	down	8.19	12.61	7.17	7.03	4.73	3	3.24	8.82	2.55
ENSRNOG00000008607	U2surp	U2 snRNP-associated SURP domain containing [Source:RGD Symbol;Acc:1307882]	0.492	-1.02251	0.00018826	0.003104	yes	down	9.09	14.11	7.73	9.43	5.34	8.43	3.36	9.14	3.09
ENSRNOG00000018708	Ppp1ca	protein phosphatase 1 catalytic subunit alpha [Source:RGD Symbol;Acc:3375]	2.1	1.07015	0.000189154	0.00311571	yes	up	183.95	167.4	154.06	189.51	264.99	349.26	361.28	249.96	463.39
ENSRNOG00000015591	Cndp2	carnosine dipeptidase 2 [Source:RGD Symbol;Acc:1305827]	2.367	1.24296	0.000193342	0.00317238	yes	up	31.27	18.39	14.53	34.03	46.37	47.88	62.62	44.05	62.96
ENSRNOG00000015869	Pccb	propionyl-CoA carboxylase subunit beta [Source:RGD Symbol;Acc:3265]	2.173	1.12001	0.000193622	0.0031739	yes	up	25.28	20.35	22.21	27.8	40.3	46.89	64.59	37.32	50.14
ENSRNOG00000055998	U1	U1 spliceosomal RNA [Source:RFAM;Acc:RF00003]	0.094	-3.4165	0.000194474	0.00318172	yes	down	0.65	1.09	2.02	0.89	0	0.1	0.08	0.41	0
ENSRNOG00000058866	Myo5a	myosin VA [Source:RGD Symbol;Acc:3143]	0.473	-1.07962	0.000195336	0.00319275	yes	down	3.71	3.44	2.59	3.63	2.03	1.33	0.74	2.65	1.06
ENSRNOG00000046799	Phb	prohibitin [Source:RGD Symbol;Acc:3322]	2.451	1.29357	0.000196533	0.00320923	yes	up	53.5	44.11	38.6	54.26	68.58	110.6	142.66	67.71	131.86
ENSRNOG00000017071	Babam1	BRISC and BRCA1 A complex member 1 [Source:RGD Symbol;Acc:1359516]	2.141	1.09859	0.000197981	0.00322975	yes	up	30.86	25.42	38.22	46.51	51.57	87.76	63.34	61.07	89.65
ENSRNOG00000027012	Usp54	ubiquitin specific peptidase 54 [Source:RGD Symbol;Acc:1303206]	0.367	-1.44555	0.000199304	0.00323773	yes	down	30.3	60.34	51.43	33.56	19.18	9.23	12.76	32.68	7.26
ENSRNOG00000015332	Thoc1	THO complex 1 [Source:RGD Symbol;Acc:1308657]	0.495	-1.01502	0.000199416	0.00323773	yes	down	4.52	8.38	6.07	4.94	2.24	3.78	2.3	3.43	2.16
ENSRNOG00000003213	Helz	helicase with zinc finger [Source:RGD Symbol;Acc:1307049]	0.419	-1.25591	0.000199478	0.00323773	yes	down	5.63	8.58	8.32	6.84	1.64	1.62	1.61	2.04	0.85
ENSRNOG00000042271	Ubb	ubiquitin B [Source:RGD Symbol;Acc:621562]	3.372	1.75354	0.000199524	0.00323773	yes	up	4842	3925.01	4905.76	4594.76	6105.3	11193.3	29655.5	6890.19	11610.5
ENSRNOG00000022044	Cabp4	calcium binding protein 4 [Source:RGD Symbol;Acc:1306083]	0.329	-1.60174	0.000199615	0.00323773	yes	down	4.15	3.14	2.14	1.36	0.5	0.76	0.89	1.01	0.77
ENSRNOG00000003635	Disp1	dispatched RND transporter family member 1 [Source:RGD Symbol;Acc:1307675]	0.473	-1.0794	0.000200139	0.00324158	yes	down	9.58	16.6	8.59	9.76	2.94	2.8	5.04	4.04	2.72
ENSRNOG00000037188	Mug1	murinoglobulin 1 [Source:RGD Symbol;Acc:621366]	0.074	-3.74797	0.000200425	0.00324158	yes	down	1.49	9.63	15	0.89	3.42	0.58	0.01	3.41	0.49
ENSRNOG00000012864	Ern1	endoplasmic reticulum to nucleus signaling 1 [Source:RGD Symbol;Acc:1559716]	0.449	-1.15472	0.000201743	0.00325977	yes	down	15.2	12.64	9.74	8.61	4.84	8.7	9.17	7.61	7.97
ENSRNOG00000009285	Eipr1	EARP complex and GARP complex interacting protein 1 [Source:RGD Symbol;Acc:1305817]	2.263	1.17842	0.000202062	0.00326183	yes	up	9.95	9.15	7.21	9.35	10.92	17.35	23.54	19.6	20.62
ENSRNOG00000051812	AC129370.1	-	0.116	-3.10501	0.00020374	0.00328579	yes	down	1.49	4.2	3.43	3.02	0.81	0.43	0	1.12	0
ENSRNOG00000060998	AABR07029467.2	-	0.089	-3.48917	0.000207939	0.00334715	yes	down	116.37	207.65	132.23	124.81	46.89	4.23	0	21.27	0
ENSRNOG00000020281	Kif22	kinesin family member 22 [Source:RGD Symbol;Acc:1311886]	2.846	1.50898	0.000209626	0.00336792	yes	up	1.92	2.04	1.21	1.31	2.01	5.21	3.18	4.01	6.87
ENSRNOG00000059904	AABR07070161.4	-	0.017	-5.90965	0.000210193	0.00337383	yes	down	0.27	2.22	2.54	1.18	0	0	0	0	0
ENSRNOG00000019494	Psmb10	proteasome 20S subunit beta 10 [Source:RGD Symbol;Acc:1307428]	2.264	1.17866	0.000210591	0.00337703	yes	up	73.25	60	61.12	65.67	97.42	124.6	138.19	103.26	211.24
ENSRNOG00000014098	Pold2	DNA polymerase delta 2, accessory subunit [Source:RGD Symbol;Acc:1304954]	2.124	1.08678	0.000211619	0.0033903	yes	up	10.56	9.99	7.44	11.66	16.41	20.88	16.03	16.02	27.43
ENSRNOG00000022971	AC115666.1	zinc finger protein 454 [Source:NCBI gene;Acc:102555919]	0.257	-1.96145	0.000213845	0.0034195	yes	down	0.47	0.83	0.72	1.02	0.27	0.07	0.11	0.21	0.26
ENSRNOG00000009585	Tcf20	transcription factor 20 [Source:RGD Symbol;Acc:1594486]	0.361	-1.46873	0.000216422	0.00345367	yes	down	2.1	2.24	1.88	2.28	1.72	0.92	0.65	0.63	0.42
ENSRNOG00000039807	Fam193b	family with sequence similarity 193, member B [Source:RGD Symbol;Acc:1562335]	0.38	-1.39485	0.00021667	0.00345367	yes	down	2.92	6.81	4.62	3.54	2.57	1.41	1.34	2.45	1.19
ENSRNOG00000005281	Stx16	syntaxin 16 [Source:RGD Symbol;Acc:1309423]	0.39	-1.35713	0.000216796	0.00345367	yes	down	3.66	6.06	6.07	3.51	1.84	1.57	1.1	4.43	1.42
ENSRNOG00000054090	U6	U6 spliceosomal RNA [Source:RFAM;Acc:RF00026]	0.087	-3.52831	0.000217348	0.00345922	yes	down	0.41	1.97	0.33	0.45	0.1	0.1	0	0	0.1
ENSRNOG00000060475	AABR07001555.1	-	0.359	-1.47748	0.000220628	0.00350157	yes	down	12.94	9.13	15.4	4.53	4.22	6.16	3.88	2.2	4.11
ENSRNOG00000033615	Mt-nd3	mitochondrially encoded NADH dehydrogenase 3 [Source:RGD Symbol;Acc:620557]	0.311	-1.68441	0.000222576	0.00352401	yes	down	1690.78	1550.12	1348.68	1695.73	1135.2	273.62	128.54	764.12	210.83
ENSRNOG00000051114	AABR07038879.1	-	0.389	-1.3632	0.000222666	0.00352401	yes	down	2.25	4.62	2.91	2.8	0.79	1.19	1.03	1.73	1.02
ENSRNOG00000019271	Ulk4	unc-51 like kinase 4 [Source:RGD Symbol;Acc:1565726]	2.819	1.49519	0.000225955	0.00356942	yes	up	0.37	0.92	0.59	4.17	0.83	1.7	0.67	2.39	1.15
ENSRNOG00000057774	RGD1560212	similar to DNA segment, Chr 18, Wayne State University 98, expressed [Source:RGD Symbol;Acc:1560212]	2.004	1.00305	0.000227422	0.00358814	yes	up	61.88	64.78	71.27	78.51	88.84	130.77	149.75	106.77	131.46
ENSRNOG00000008850	Ttc5	tetratricopeptide repeat domain 5 [Source:RGD Symbol;Acc:1311284]	2.339	1.22564	0.000227563	0.00358814	yes	up	24.3	34.84	27.67	24.1	40.08	63.84	85.98	43.2	56.89
ENSRNOG00000059331	AC107331.2	-	0.133	-2.90819	0.00023203	0.00365518	yes	down	0.26	0.36	0.27	0.46	0	0.05	0.08	0.02	0.03
ENSRNOG00000043451	Spp1	secreted phosphoprotein 1 [Source:RGD Symbol;Acc:3752]	2.644	1.40258	0.00023228	0.00365571	yes	up	16.15	20.83	5.97	20.77	24.43	25.64	43.22	56.94	43.74
ENSRNOG00000015230	Ermard	ER membrane-associated RNA degradation [Source:RGD Symbol;Acc:1309374]	0.377	-1.40869	0.00023389	0.00367765	yes	down	12.84	28.08	15.87	15.75	4.92	8.29	16.52	8.54	6.26
ENSRNOG00000018454	Apoe	apolipoprotein E [Source:RGD Symbol;Acc:2138]	2.013	1.00917	0.000235698	0.00370264	yes	up	4417.54	5385.75	4137.03	5523.48	8116.26	7993.4	12312.8	8474.56	7497.06
ENSRNOG00000046227	Tprg1l	tumor protein p63 regulated 1-like [Source:RGD Symbol;Acc:1590079]	2.213	1.14599	0.000236578	0.00370993	yes	up	194.54	263.37	218.9	240.46	312.55	451.08	682.34	409.55	423.76
ENSRNOG00000023579	Tet2	tet methylcytosine dioxygenase 2 [Source:RGD Symbol;Acc:1311625]	0.382	-1.38774	0.000236599	0.00370993	yes	down	1.98	2.38	4.27	1.99	0.83	0.71	0.53	1.52	0.2
ENSRNOG00000006338	Lrp6	LDL receptor related protein 6 [Source:RGD Symbol;Acc:1304749]	0.448	-1.15899	0.000236827	0.00371008	yes	down	12.96	10.83	9.82	12.37	7.48	3.74	3.28	6.27	2.63
ENSRNOG00000001859	Sdf2l1	stromal cell-derived factor 2-like 1 [Source:RGD Symbol;Acc:1585844]	2.351	1.23318	0.000239768	0.00374922	yes	up	45.14	36.36	37.97	72.4	64.13	87.3	129.32	108.85	123.88
ENSRNOG00000007440	Dzank1	double zinc ribbon and ankyrin repeat domains 1 [Source:RGD Symbol;Acc:1311344]	0.197	-2.34261	0.000241233	0.00376717	yes	down	1.36	2.26	4.82	1.05	0.26	0.02	0.44	0.88	0.43
ENSRNOG00000013232	Nr6a1	nuclear receptor subfamily 6, group A, member 1 [Source:RGD Symbol;Acc:1564740]	0.058	-4.10972	0.00024136	0.00376717	yes	down	3.79	5.56	1.26	1.05	0.18	0.23	0	0	0
ENSRNOG00000055096	AABR07002768.1	-	0.336	-1.57542	0.000246398	0.00384226	yes	down	2.75	6.41	4.42	3.14	0.79	2.14	1.15	2.27	0.47
ENSRNOG00000022358	AABR07026012.1	-	0.28	-1.83844	0.000247767	0.00386008	yes	down	0.82	2.33	2.25	2.17	0.47	0.47	3.31	0.55	0.25
ENSRNOG00000031420	Hyal2	hyaluronidase 2 [Source:RGD Symbol;Acc:620321]	2.203	1.13971	0.000248892	0.00387403	yes	up	14.9	20.57	18.28	17.46	27.86	36.84	46.92	25.77	39.01
ENSRNOG00000016948	Nhlrc2	NHL repeat containing 2 [Source:RGD Symbol;Acc:1307348]	0.457	-1.13109	0.000250807	0.00389826	yes	down	2.73	3.35	3.27	1.73	1.22	0.94	1.07	1.91	0.96
ENSRNOG00000052894	Epg5	ectopic P-granules autophagy protein 5 homolog [Source:RGD Symbol;Acc:1306286]	0.354	-1.49861	0.000253158	0.00392249	yes	down	0.46	0.88	0.47	0.66	0.26	0.24	0.1	0.37	0.12
ENSRNOG00000014139	Sclt1	sodium channel and clathrin linker 1 [Source:RGD Symbol;Acc:628721]	0.43	-1.21698	0.000253161	0.00392249	yes	down	2.61	4.05	2.84	2.97	0.99	2.24	1.02	1.47	0.98
ENSRNOG00000055251	Prtg	protogenin [Source:RGD Symbol;Acc:1307157]	0.414	-1.27291	0.00025668	0.00396616	yes	down	2.75	5.34	6.66	8.23	2.34	3.43	2.39	2.62	1.78
ENSRNOG00000051023	Sap25	Sin3A-associated protein 25 [Source:RGD Symbol;Acc:1562406]	0.024	-5.37185	0.000257773	0.00397942	yes	down	0.31	1.15	1.48	1.94	0.13	0	0	0	0
ENSRNOG00000001616	Senp7	SUMO specific peptidase 7 [Source:RGD Symbol;Acc:1305510]	0.481	-1.05447	0.000259355	0.00399872	yes	down	4.01	4.72	3.46	2.61	1.6	2.01	1.26	2.86	1
ENSRNOG00000059326	Abca9	ATP binding cassette subfamily A member 9 [Source:RGD Symbol;Acc:1305931]	0.259	-1.94694	0.000259495	0.00399872	yes	down	1.4	1.33	0.74	0.79	0.45	0.06	0.35	0.42	0.07
ENSRNOG00000007859	Cep83	centrosomal protein 83 [Source:RGD Symbol;Acc:1359593]	0.431	-1.21432	0.000259749	0.003999	yes	down	6.46	15.9	9.89	8.91	2.89	5.33	3.51	6.45	2.98
ENSRNOG00000024737	Tnrc6a	trinucleotide repeat containing adaptor 6A [Source:RGD Symbol;Acc:1307268]	0.441	-1.18222	0.000260348	0.00400459	yes	down	9.2	16.27	18.16	16.03	5.53	6.24	7.14	8.01	2.93
ENSRNOG00000058357	Gstm3	glutathione S-transferase mu 3 [Source:RGD Symbol;Acc:11402080]	3.867	1.95111	0.00026253	0.00402356	yes	up	5.4	8.47	8.42	13.4	11.29	39.25	66.17	10.91	26.04
ENSRNOG00000033583	LOC100910577	zinc finger protein 709-like [Source:RGD Symbol;Acc:6497573]	0.493	-1.02164	0.00026292	0.00402591	yes	down	14.46	24.51	16.87	12.54	6.86	12.89	5.32	10.4	8.31
ENSRNOG00000033434	Casp12	caspase 12 [Source:RGD Symbol;Acc:621758]	0.486	-1.0407	0.000264895	0.00404883	yes	down	8.76	15	6.18	9.83	6.56	6.17	6.88	6.28	5.55
ENSRNOG00000054724	Pycr3	pyrroline-5-carboxylate reductase 3 [Source:RGD Symbol;Acc:1309115]	2.035	1.02494	0.000265879	0.00404928	yes	up	27.24	20.99	25.94	26.69	36.93	46.55	56.89	42.27	52.35
ENSRNOG00000019598	Vegfa	vascular endothelial growth factor A [Source:RGD Symbol;Acc:619991]	0.449	-1.15634	0.000266686	0.00405429	yes	down	10.78	19.2	14.19	11.4	5.81	8.05	2.76	11.75	3.97
ENSRNOG00000015560	Emsy	EMSY transcriptional repressor, BRCA2 interacting [Source:RGD Symbol;Acc:1310712]	0.439	-1.1866	0.000267456	0.00406236	yes	down	2.2	6.13	4.08	6.08	1.7	1.4	0.4	1.7	1.04
ENSRNOG00000012148	Trio	trio Rho guanine nucleotide exchange factor [Source:RGD Symbol;Acc:1308360]	0.346	-1.53006	0.000268936	0.00407754	yes	down	8.22	20.69	19.64	17.9	1.64	1.34	4.76	4.29	1.13
ENSRNOG00000009640	Psmf1	proteasome inhibitor subunit 1 [Source:RGD Symbol;Acc:1587528]	2.527	1.33721	0.000269857	0.00408785	yes	up	54.73	37.82	46.78	60.15	71.75	111.29	187.74	86.65	103.82
ENSRNOG00000047137	Erbin	erbb2 interacting protein [Source:RGD Symbol;Acc:1562952]	0.48	-1.05833	0.000275364	0.00416383	yes	down	25.06	30.71	22.7	22.81	11.24	8.4	11.22	21.66	6.25
ENSRNOG00000008075	Ift74	intraflagellar transport 74 [Source:RGD Symbol;Acc:1359704]	0.428	-1.2244	0.000281293	0.00424216	yes	down	9.57	16.65	11.58	13.99	2.53	9.23	6.13	8.53	3.59
ENSRNOG00000023807	Ccnyl1	cyclin Y-like 1 [Source:RGD Symbol;Acc:1310683]	0.421	-1.24923	0.000282739	0.00425053	yes	down	6.22	10.27	7	5.12	3.31	4.17	0.85	4.82	2.35
ENSRNOG00000024934	Npat	nuclear protein, co-activator of histone transcription [Source:RGD Symbol;Acc:1311947]	0.497	-1.00939	0.000282891	0.00425053	yes	down	3.12	4.47	3.57	2.96	1.24	2.16	1.3	2.78	1.08
ENSRNOG00000017503	Ppargc1b	PPARG coactivator 1 beta [Source:RGD Symbol;Acc:727948]	0.427	-1.22741	0.000282965	0.00425053	yes	down	4.16	10.29	9.41	6.28	0.75	2	2.48	1.65	1.77
ENSRNOG00000054204	Gria2	glutamate ionotropic receptor AMPA type subunit 2 [Source:RGD Symbol;Acc:61862]	0.341	-1.55273	0.000283102	0.00425053	yes	down	2.18	4.42	2.26	0.89	0.54	1.35	0.49	1.25	0.54
ENSRNOG00000047387	Lnpep	leucyl and cystinyl aminopeptidase [Source:RGD Symbol;Acc:621752]	0.097	-3.36629	0.00028606	0.00428736	yes	down	0.89	4	5.28	3.16	0.08	0	0.24	0.83	0.12
ENSRNOG00000019376	Zfp329	zinc finger protein 329 [Source:RGD Symbol;Acc:1565029]	0.451	-1.15007	0.000286926	0.00429655	yes	down	1.15	1.45	1.54	1.18	0.55	0.42	0.66	0.84	0.37
ENSRNOG00000004603	Srgap1	SLIT-ROBO Rho GTPase activating protein 1 [Source:RGD Symbol;Acc:1566260]	0.223	-2.16711	0.000287937	0.00430788	yes	down	4.51	3.87	3.17	1.19	0.22	0.04	0.45	0.58	0.17
ENSRNOG00000017901	Acy3	aminoacylase 3 [Source:RGD Symbol;Acc:1305394]	2.069	1.04909	0.00029023	0.00433836	yes	up	26.16	32.17	28.95	28.35	47.22	70.71	75.48	49.65	43.35
ENSRNOG00000003802	Pttg1	PTTG1 regulator of sister chromatid separation, securin [Source:RGD Symbol;Acc:68359]	2.948	1.55997	0.000292104	0.00436253	yes	up	2.06	3.17	1.49	3.71	4.68	9.72	9.67	5.78	7.01
ENSRNOG00000059691	AABR07033318.1	-	0.074	-3.74942	0.000295847	0.00441455	yes	down	0.07	0.45	0.35	0.15	0	0.02	0.03	0.03	0
ENSRNOG00000015813	Ubr2	ubiquitin protein ligase E3 component n-recognin 2 [Source:RGD Symbol;Acc:1593237]	0.435	-1.19995	0.000296773	0.00442448	yes	down	3.01	5.31	3.49	4.47	2.66	1.63	1.04	3.75	0.87
ENSRNOG00000012385	Naa15	N(alpha)-acetyltransferase 15, NatA auxiliary subunit [Source:RGD Symbol;Acc:1310984]	0.395	-1.33828	0.000297623	0.00443325	yes	down	4.97	8.19	6.63	5.57	2.09	1.71	3.34	4.61	1.08
ENSRNOG00000000368	Grik2	glutamate ionotropic receptor kainate type subunit 2 [Source:RGD Symbol;Acc:2733]	0.228	-2.12998	0.000299894	0.00445925	yes	down	3.27	5.82	3.79	2.86	1.23	0.9	0.17	1.26	0.07
ENSRNOG00000052003	Mkrn2os	MKRN2 opposite strand [Source:RGD Symbol;Acc:2320714]	0.146	-2.77973	0.000301157	0.0044741	yes	down	0.21	0.35	0.26	0.22	0.04	0.03	0	0.1	0.03
ENSRNOG00000027747	Ninl	ninein-like [Source:RGD Symbol;Acc:1306152]	0.275	-1.86178	0.000306432	0.00454055	yes	down	0.91	2.45	3.03	4.01	0.58	0.18	0.11	0.15	0.5
ENSRNOG00000058727	LOC100910284	brevican core protein-like [Source:RGD Symbol;Acc:6499197]	2.412	1.27005	0.00030707	0.00454603	yes	up	8.95	10.47	11.58	5.12	20.22	16.01	22.05	25.69	15.75
ENSRNOG00000012367	Pcdh7	protocadherin 7 [Source:RGD Symbol;Acc:1303209]	0.382	-1.38836	0.000307866	0.00455384	yes	down	5.04	6.21	2.77	2.72	1.7	1.07	1.35	3.25	0.67
ENSRNOG00000003712	Ppp4r3b	protein phosphatase 4, regulatory subunit 3B [Source:RGD Symbol;Acc:1309450]	0.497	-1.00923	0.000308272	0.00455487	yes	down	7.4	9.68	8.02	7.04	3.81	4.59	3.37	5.84	1.73
ENSRNOG00000022289	Aip	aryl-hydrocarbon receptor-interacting protein [Source:RGD Symbol;Acc:628619]	2.142	1.09922	0.000308473	0.00455487	yes	up	89.29	71.64	76.1	85.72	119.3	153.98	222.78	130.11	159.91
ENSRNOG00000012500	Ddx10	DEAD-box helicase 10 [Source:RGD Symbol;Acc:1308990]	0.439	-1.18707	0.000309046	0.00455937	yes	down	4.09	5.71	2.51	3.86	2.18	2.06	0.82	2.53	1.09
ENSRNOG00000053319	AC095852.3	-	0.414	-1.27171	0.000310337	0.00457443	yes	down	3.83	2.43	3.01	3.48	1.52	0.79	1.14	1.86	0.82
ENSRNOG00000024372	Cwf19l2	CWF19 like cell cycle control factor 2 [Source:RGD Symbol;Acc:1310083]	0.455	-1.1366	0.000310795	0.00457721	yes	down	5.03	6.66	6.27	4.02	1.52	3.05	2.43	2.73	1.54
ENSRNOG00000042686	Trim34	tripartite motif-containing 34 [Source:RGD Symbol;Acc:7240857]	0.423	-1.24017	0.000311602	0.00458512	yes	down	2.04	4.22	3.84	4.1	2.11	1.5	0.79	1.9	1.82
ENSRNOG00000007657	Col27a1	collagen type XXVII alpha 1 chain [Source:RGD Symbol;Acc:735115]	0.134	-2.90424	0.000314744	0.00462246	yes	down	0.07	0.62	0.81	0.4	0.09	0.09	0	0.07	0.06
ENSRNOG00000054506	Nccrp1	NCCRP1, F-box associated domain containing [Source:RGD Symbol;Acc:1305932]	4.168	2.0594	0.000314957	0.00462246	yes	up	0.5	0.18	0.34	0.83	2.55	1.71	0.8	2.22	2.08
ENSRNOG00000016910	Ralgps1	Ral GEF with PH domain and SH3 binding motif 1 [Source:RGD Symbol;Acc:2319500]	0.416	-1.26507	0.000320463	0.0046911	yes	down	2.91	8.72	13.15	7.55	2.07	2.04	2.98	3.84	1.31
ENSRNOG00000000459	Psmb9	proteasome 20S subunit beta 9 [Source:RGD Symbol;Acc:3427]	2.506	1.32561	0.000322217	0.00471269	yes	up	38.57	24.74	27.75	30.63	66.62	51.73	52.58	48.6	129.08
ENSRNOG00000011238	Tiparp	TCDD-inducible poly(ADP-ribose) polymerase [Source:RGD Symbol;Acc:1306171]	0.486	-1.04219	0.000324359	0.0047344	yes	down	3.24	5.1	4.47	5.65	2.56	2.74	1.62	3.01	1.41
ENSRNOG00000037162	Slbp	stem-loop binding protein [Source:RGD Symbol;Acc:1584682]	2.068	1.04799	0.000324538	0.0047344	yes	up	19.66	17.72	16.22	18.25	21.23	43.23	36.65	29.74	40.54
ENSRNOG00000021724	Ptprcap	protein tyrosine phosphatase, receptor type, C-associated protein [Source:RGD Symbol;Acc:1559601]	3.243	1.6972	0.000326817	0.00476189	yes	up	0.93	1.42	0.81	1.69	2.85	4.07	2.8	5.25	3.83
ENSRNOG00000056106	Dip2b	disco-interacting protein 2 homolog B [Source:RGD Symbol;Acc:1305671]	0.395	-1.34139	0.000326984	0.00476189	yes	down	8.57	9.83	5.47	5.02	3.48	3.19	4.54	3.39	0.73
ENSRNOG00000005359	Csrnp3	cysteine and serine rich nuclear protein 3 [Source:RGD Symbol;Acc:1306214]	0.346	-1.53175	0.000327792	0.00476956	yes	down	4.7	15.11	9.24	5.09	2.49	2.18	1.35	6.09	1.34
ENSRNOG00000051931	AABR07027235.1	-	0.023	-5.43256	0.000328762	0.00477958	yes	down	0.47	1.91	1.07	0.16	0	0	0	0.09	0
ENSRNOG00000013517	Phtf2	putative homeodomain transcription factor 2 [Source:RGD Symbol;Acc:1310593]	0.41	-1.2861	0.000331712	0.0048114	yes	down	6.64	4.23	3.77	5.11	4.03	2.01	0.59	2.07	1.45
ENSRNOG00000000931	Sfswap	splicing factor SWAP [Source:RGD Symbol;Acc:1305004]	0.466	-1.10174	0.000331801	0.0048114	yes	down	11.26	21.96	21.66	15.02	6.84	5.38	4.37	11.14	4.25
ENSRNOG00000060950	AABR07046961.1	-	0.181	-2.46571	0.000333385	0.00483024	yes	down	1.44	4.56	2.94	1.49	0.28	0.41	0.96	0.17	0.2
ENSRNOG00000008666	Etl4	enhancer trap locus 4 [Source:RGD Symbol;Acc:1563437]	0.493	-1.02066	0.000334769	0.00484117	yes	down	13.24	9.44	8.25	14.2	8.11	4.92	2.93	7.06	3.91
ENSRNOG00000062281	AABR07030514.2	-	0.095	-3.39421	0.000334984	0.00484117	yes	down	1.76	4.18	2.12	4.29	0	0.61	0.31	0.42	0.12
ENSRNOG00000011908	Asxl2	ASXL transcriptional regulator 2 [Source:RGD Symbol;Acc:1304710]	0.308	-1.69773	0.000334996	0.00484117	yes	down	2.11	2.93	2.7	1.94	1.11	0.69	0.1	1.44	0.48
ENSRNOG00000016627	Eya4	EYA transcriptional coactivator and phosphatase 4 [Source:RGD Symbol;Acc:1307099]	0.286	-1.80828	0.000336052	0.0048523	yes	down	1.08	2.28	1.29	1.46	0.41	0.57	0.37	1.04	0.25
ENSRNOG00000026277	Zc3h6	zinc finger CCCH type containing 6 [Source:RGD Symbol;Acc:1311061]	0.492	-1.02359	0.000337624	0.00487086	yes	down	5.14	6.2	6.66	5.93	2.29	2.66	3.24	4.16	2
ENSRNOG00000013048	Pde7a	phosphodiesterase 7A [Source:RGD Symbol;Acc:68391]	0.298	-1.74435	0.000340574	0.00490924	yes	down	1.13	7.67	4.51	2.2	1.12	0.76	1.66	0.86	0.74
ENSRNOG00000056703	Atrx	ATRX, chromatin remodeler [Source:RGD Symbol;Acc:619795]	0.44	-1.18379	0.000340941	0.00491036	yes	down	6.72	10.24	6.89	10.3	3.46	4.35	5.78	5.52	1.55
ENSRNOG00000006899	Akap14	A-kinase anchoring protein 14 [Source:RGD Symbol;Acc:708510]	0.478	-1.06355	0.000342106	0.00491943	yes	down	5.74	7.83	8.08	5.95	3.74	4.81	1.57	4.93	2.52
ENSRNOG00000015288	Dip2c	disco-interacting protein 2 homolog C [Source:RGD Symbol;Acc:1560155]	0.481	-1.05688	0.00034215	0.00491943	yes	down	5.75	6.58	3.82	4.5	1.48	1.82	2.82	3.51	0.68
ENSRNOG00000005470	Atxn3	ataxin 3 [Source:RGD Symbol;Acc:621567]	0.455	-1.13531	0.000343491	0.00493452	yes	down	5.11	4.88	6.22	2.4	2.68	3.6	1.39	2.87	4.64
ENSRNOG00000029321	Ccser1	coiled-coil serine-rich protein 1 [Source:RGD Symbol;Acc:1565731]	0.094	-3.40465	0.000343902	0.00493624	yes	down	4.91	14.25	2.19	1.8	0.22	0.05	0	0.37	0
ENSRNOG00000013321	Dock11	dedicator of cytokinesis 11 [Source:RGD Symbol;Acc:1564707]	0.449	-1.15654	0.000344889	0.00494622	yes	down	2.49	1.5	1.37	2.32	1.15	0.74	0.42	1.04	0.82
ENSRNOG00000001391	Sdsl	serine dehydratase-like [Source:RGD Symbol;Acc:1309192]	2.245	1.16695	0.000345201	0.00494652	yes	up	18.43	13.7	21.87	18.4	25.19	45.2	48.23	29.8	37.58
ENSRNOG00000031669	Lpp	LIM domain containing preferred translocation partner in lipoma [Source:RGD Symbol;Acc:1310535]	0.37	-1.43518	0.000349775	0.00500361	yes	down	5.61	5.89	6.61	7.83	4.17	1.8	0.86	3.66	1.22
ENSRNOG00000038370	AABR07034632.1	-	0.037	-4.7666	0.000351086	0.00501814	yes	down	0.37	1.26	8.82	0	0	0	0.12	0.32	0.12
ENSRNOG00000004659	Creld2	cysteine-rich with EGF-like domains 2 [Source:RGD Symbol;Acc:1310614]	2.126	1.08818	0.000352558	0.00503493	yes	up	55.9	48.99	53.78	56.92	74.27	104.95	148.24	92.01	100.06
ENSRNOG00000021856	Lat2	linker for activation of T cells family, member 2 [Source:RGD Symbol;Acc:631397]	2.365	1.24183	0.000355956	0.00507491	yes	up	2.15	3.68	3.45	6.75	3.93	15.27	11.16	11.56	19.87
ENSRNOG00000024801	Slc35a2	solute carrier family 35 member A2 [Source:RGD Symbol;Acc:2293497]	2.014	1.00988	0.000358184	0.0051024	yes	up	7.56	12.51	13.1	15.19	18.7	21.52	24.43	22.44	24.91
ENSRNOG00000058491	AABR07017104.2	-	0.127	-2.98164	0.000358611	0.00510419	yes	down	1.96	3.92	2.58	2.35	0.64	0	0	0.47	0.57
ENSRNOG00000001632	Brwd1	bromodomain and WD repeat domain containing 1 [Source:RGD Symbol;Acc:1309030]	0.474	-1.0767	0.000359172	0.0051079	yes	down	6.52	10.05	11.94	9.32	2.35	3.48	2.54	6.11	1.54
ENSRNOG00000011425	Ptpn3	protein tyrosine phosphatase, non-receptor type 3 [Source:RGD Symbol;Acc:1311363]	0.249	-2.00807	0.000364251	0.00517145	yes	down	9.8	21.75	12.73	17.01	0.93	2.89	0.81	4.31	0.52
ENSRNOG00000006075	Fez1	fasciculation and elongation protein zeta 1 [Source:RGD Symbol;Acc:619708]	2.175	1.12122	0.000365162	0.00518004	yes	up	315.01	337.03	319.12	249.04	359.54	604.94	890.92	652.5	474.33
ENSRNOG00000018898	Mpi	mannose phosphate isomerase [Source:RGD Symbol;Acc:3107]	2.155	1.10762	0.000369113	0.00522735	yes	up	33.78	35.6	27.78	31.25	49.71	46.91	85.6	53.76	72.35
ENSRNOG00000002574	Nubp1	nucleotide binding protein 1 [Source:RGD Symbol;Acc:1310514]	2.235	1.16002	0.000371551	0.00523794	yes	up	49.2	44.35	46.08	54.52	70.68	100.35	129.63	66.93	122.71
ENSRNOG00000017836	Rrp36	ribosomal RNA processing 36 [Source:RGD Symbol;Acc:2321693]	2.052	1.03732	0.000371713	0.00523794	yes	up	6.27	6.25	10.34	7.64	10.99	14.93	13.84	16.23	21.65
ENSRNOG00000012850	Kat6b	lysine acetyltransferase 6B [Source:RGD Symbol;Acc:1566399]	0.477	-1.0676	0.000372914	0.0052505	yes	down	2.6	11.89	6.39	6.68	2.45	2.94	2.32	3.61	1.89
ENSRNOG00000057279	AABR07006566.1	-	0.02	-5.64432	0.000374691	0.00527116	yes	down	0.04	0.19	0.35	1.53	0	0	0.03	0	0
ENSRNOG00000053574	Tarbp1	TAR (HIV-1) RNA binding protein 1 [Source:RGD Symbol;Acc:1589526]	0.425	-1.23477	0.000375085	0.00527232	yes	down	4.02	3.89	4.03	4.88	1.88	2.46	0.77	3.27	0.89
ENSRNOG00000022540	Trex1	three prime repair exonuclease 1 [Source:RGD Symbol;Acc:1311998]	2.253	1.17155	0.000378631	0.00530314	yes	up	13.07	8.63	8.27	13.1	23.42	18.35	20.08	17.58	31.85
ENSRNOG00000048910	Zfp709l1	zinc finger protein 709-like 1 [Source:RGD Symbol;Acc:1596088]	0.214	-2.22479	0.000378641	0.00530314	yes	down	1.82	8.1	3.75	2.52	0.48	1.68	1.87	0.3	0.65
ENSRNOG00000009542	Kcnh5	potassium voltage-gated channel subfamily H member 5 [Source:RGD Symbol;Acc:621417]	0.083	-3.59377	0.00037884	0.00530314	yes	down	0.81	2.87	2.73	0.08	0.1	0.33	0	0.35	0
ENSRNOG00000024482	Tnrc18	trinucleotide repeat containing 18 [Source:RGD Symbol;Acc:1307540]	0.333	-1.58806	0.000380346	0.00531544	yes	down	5.3	9.65	10.87	7.19	1.89	0.86	0.34	2.67	0.46
ENSRNOG00000014603	Sgcg	sarcoglycan, gamma [Source:RGD Symbol;Acc:1359577]	3.696	1.88612	0.000383764	0.00534608	yes	up	1.11	1.57	2.58	2.22	1.78	4.81	12.4	5.55	6.76
ENSRNOG00000024523	Dnai2	dynein, axonemal, intermediate chain 2 [Source:RGD Symbol;Acc:1359602]	3.275	1.71168	0.000384039	0.00534608	yes	up	0.45	0.23	0.14	0.47	1	1	0.78	0.96	1.25
ENSRNOG00000021384	Ankrd44	ankyrin repeat domain 44 [Source:RGD Symbol;Acc:1561893]	0.334	-1.58408	0.000384113	0.00534608	yes	down	1.87	4.35	2.56	1.68	0.6	0.79	0.73	1.42	0.28
ENSRNOG00000026845	Fam81b	family with sequence similarity 81, member B [Source:RGD Symbol;Acc:1561830]	0.122	-3.0331	0.000385287	0.00535801	yes	down	1.75	2.64	2.16	6.59	0.14	0.76	1.06	0	0.12
ENSRNOG00000059549	LOC102549993	uncharacterized LOC102549993 [Source:RGD Symbol;Acc:7639286]	0.091	-3.46368	0.000387087	0.00537424	yes	down	0.88	1.57	0.48	2.79	0	0.06	0.12	0.07	0.34
ENSRNOG00000016790	Kmt5b	lysine methyltransferase 5B [Source:RGD Symbol;Acc:1311637]	0.497	-1.00735	0.000387493	0.00537547	yes	down	3.44	6.23	5.78	4.4	2.03	2	1.18	3.25	1.09
ENSRNOG00000061262	Huwe1	HECT, UBA and WWE domain containing E3 ubiquitin protein ligase 1 [Source:RGD Symbol;Acc:1561763]	0.476	-1.07199	0.000392272	0.00542403	yes	down	10.21	13.16	10.53	13.02	7.18	4.05	2.52	10.26	3.41
ENSRNOG00000011829	Rpgrip1l	Rpgrip1-like [Source:RGD Symbol;Acc:1311099]	0.328	-1.60949	0.000401915	0.00554381	yes	down	1.47	3.37	4.3	1.93	1.04	0.86	0.1	1.3	0.34
ENSRNOG00000024867	Eme2	essential meiotic structure-specific endonuclease subunit 2 [Source:RGD Symbol;Acc:1304924]	2.5	1.32213	0.000407126	0.00560202	yes	up	8.09	7.59	8.19	9.75	12.81	22.94	24.29	9.87	28.89
ENSRNOG00000059362	Has3	hyaluronan synthase 3 [Source:RGD Symbol;Acc:628656]	0.177	-2.49476	0.000408828	0.00561633	yes	down	0.21	0.38	0.32	0.3	0.08	0.07	0	0.11	0.02
ENSRNOG00000056767	AC136588.3	-	4.219	2.07675	0.000414345	0.0056646	yes	up	3.43	7.08	3.33	5.24	5.81	11.94	43.21	7.69	13.18
ENSRNOG00000020346	Best1	bestrophin 1 [Source:RGD Symbol;Acc:1311656]	0.406	-1.29919	0.000416328	0.00568256	yes	down	8.03	15.22	5.16	11.16	5.98	7.97	4.55	18.58	10.3
ENSRNOG00000013000	Ldhb	lactate dehydrogenase B [Source:RGD Symbol;Acc:2997]	2.328	1.21884	0.000418911	0.00570862	yes	up	327.12	304.19	438.84	417.51	435.81	907.59	1190.61	696.04	689.84
ENSRNOG00000037509	Chek2	checkpoint kinase 2 [Source:RGD Symbol;Acc:621543]	2.123	1.08599	0.000419203	0.00570862	yes	up	2.4	3.07	3.84	2.66	4.29	6.22	4.39	4.49	3.89
ENSRNOG00000019048	Sod2	superoxide dismutase 2 [Source:RGD Symbol;Acc:3732]	2.64	1.40079	0.000419247	0.00570862	yes	up	70.83	68.59	60.89	80.51	87	172.97	139.78	125.78	399.29
ENSRNOG00000039284	Haus4	HAUS augmin-like complex, subunit 4 [Source:RGD Symbol;Acc:1305288]	2.673	1.41848	0.000422344	0.00573239	yes	up	2.32	3.41	1.63	4.47	5.99	6.5	7.64	5.32	9.66
ENSRNOG00000014462	Fnta	farnesyltransferase, CAAX box, alpha [Source:RGD Symbol;Acc:2625]	2.132	1.09211	0.000422977	0.0057364	yes	up	130.78	172.09	155.05	115.13	186.8	286.58	393.27	248.2	250.82
ENSRNOG00000057296	AC112001.1	-	0.153	-2.71306	0.000425	0.00575659	yes	down	0.26	0.71	0.46	0.64	0.17	0.07	0.02	0	0.1
ENSRNOG00000010268	Vom2r44	vomeronasal 2 receptor 44 [Source:RGD Symbol;Acc:708515]	0.062	-4.01421	0.000425641	0.00575871	yes	down	0.06	0.26	0.22	0.21	0	0	0.01	0.06	0
ENSRNOG00000007886	Orm1	orosomucoid 1 [Source:RGD Symbol;Acc:67390]	0.014	-6.13728	0.000427923	0.00578037	yes	down	0.08	0.36	3.05	0.24	0	0	0	0	0
ENSRNOG00000007106	Sos1	SOS Ras/Rac guanine nucleotide exchange factor 1 [Source:RGD Symbol;Acc:1310949]	0.495	-1.01457	0.000434985	0.00586176	yes	down	6.19	7.99	7.05	6.2	2.5	2.81	1.81	5.27	1.32
ENSRNOG00000003581	Pou2f1	POU class 2 homeobox 1 [Source:RGD Symbol;Acc:621689]	0.362	-1.46526	0.000435357	0.00586212	yes	down	4.61	7.25	5.61	5.51	1.08	1.15	1.47	0.72	0.86
ENSRNOG00000009409	Fbxo2	F-box protein 2 [Source:RGD Symbol;Acc:621751]	2.503	1.32375	0.000439484	0.005913	yes	up	528.46	392.22	840.08	534.52	507.95	1954.1	1471.69	1339.91	1452.66
ENSRNOG00000057447	Kri1	KRI1 homolog [Source:RGD Symbol;Acc:1588903]	2.117	1.0817	0.000441676	0.00593429	yes	up	2.77	4	2.16	3.8	4.78	5.89	5.3	7.81	3.04
ENSRNOG00000055266	AC123185.3	-	0.429	-1.22074	0.000441766	0.00593429	yes	down	5.39	10.36	9.23	7.26	2.18	2.2	2.54	3.75	0.94
ENSRNOG00000006027	Eif2ak4	eukaryotic translation initiation factor 2 alpha kinase 4 [Source:RGD Symbol;Acc:1311439]	0.479	-1.0608	0.000442425	0.00593843	yes	down	1.69	22.52	3.82	3.73	2.39	2.32	2.6	1.46	1.41
ENSRNOG00000010124	Trim2	tripartite motif-containing 2 [Source:RGD Symbol;Acc:1310981]	0.454	-1.14046	0.000445055	0.0059643	yes	down	26.06	41.14	30.22	17.53	9.75	11.44	7.66	21.84	7.54
ENSRNOG00000009346	Zbtb26	zinc finger and BTB domain containing 26 [Source:RGD Symbol;Acc:1308561]	0.375	-1.41684	0.000446838	0.00598346	yes	down	4.49	7.49	8.26	8.24	4.07	1.09	5.29	2.42	1.7
ENSRNOG00000006731	Spc25	SPC25 component of NDC80 kinetochore complex [Source:RGD Symbol;Acc:1307811]	2.726	1.44702	0.00045062	0.00602935	yes	up	2.01	3.94	1.52	2.51	5.31	7.54	6.65	3.78	7.31
ENSRNOG00000008091	Gins1	GINS complex subunit 1 [Source:RGD Symbol;Acc:1562246]	2.88	1.52599	0.000452271	0.00604191	yes	up	2.38	4.78	2.1	4.62	5.6	12.17	7.51	6.17	13.92
ENSRNOG00000018615	Cenph	centromere protein H [Source:RGD Symbol;Acc:1583506]	4.136	2.04823	0.000455218	0.00607412	yes	up	0.65	0.41	0.4	0.61	1.2	2.18	2.41	1.21	2.63
ENSRNOG00000017404	Pcmtd2	protein-L-isoaspartate (D-aspartate) O-methyltransferase domain containing 2 [Source:RGD Symbol;Acc:1305684]	0.485	-1.04422	0.000455398	0.00607412	yes	down	12.54	18.98	13.12	12.25	8.01	7.83	3.29	11.49	3.61
ENSRNOG00000023548	Sned1	sushi, nidogen and EGF-like domains 1 [Source:RGD Symbol;Acc:1566079]	0.456	-1.13412	0.000455887	0.00607587	yes	down	7.01	13.01	12.78	8.53	5.57	3.53	3.74	7.3	2.07
ENSRNOG00000025757	Myh6	myosin heavy chain 6 [Source:RGD Symbol;Acc:62029]	0.177	-2.49519	0.000462652	0.00616118	yes	down	3.02	5.1	4.85	3.2	0.15	0.05	0.62	1.32	0.16
ENSRNOG00000013993	AABR07007000.1	transcription factor 7 like 2 [Source:NCBI gene;Acc:679869]	0.281	-1.83076	0.000463108	0.00616242	yes	down	8.46	19.74	13.28	11.06	7.44	1.3	0.74	3.23	2.11
ENSRNOG00000019244	Mxra8	matrix remodeling associated 8 [Source:RGD Symbol;Acc:1359356]	2.223	1.1524	0.000468303	0.00622013	yes	up	114.68	103.73	100.59	138.19	186.06	209.42	365.11	186.01	190.1
ENSRNOG00000003566	Apoh	apolipoprotein H [Source:RGD Symbol;Acc:1310625]	0.045	-4.46965	0.000468544	0.00622013	yes	down	0.6	0.7	7.1	0.13	0	0.28	0	0.26	0
ENSRNOG00000007099	S100pbp	S100P binding protein [Source:RGD Symbol;Acc:1564943]	0.493	-1.01977	0.000472154	0.00625337	yes	down	6.66	7.42	6.4	5.16	4.13	1.49	1.72	2.63	2.01
ENSRNOG00000003472	Atp11c	ATPase phospholipid transporting 11C [Source:RGD Symbol;Acc:1564481]	0.426	-1.23238	0.000476556	0.00629256	yes	down	2.15	3.11	4.25	3.31	1.52	1.99	2.24	1.62	0.61
ENSRNOG00000020386	Ash1l	ASH1 like histone lysine methyltransferase [Source:RGD Symbol;Acc:1306350]	0.491	-1.0249	0.000477762	0.00630304	yes	down	5.79	7.42	5.59	4.78	2.71	2.45	2.71	4.78	1.17
ENSRNOG00000013565	Zfp507	zinc finger protein 507 [Source:RGD Symbol;Acc:1307017]	0.404	-1.30844	0.000478135	0.00630306	yes	down	3.76	5.63	4.9	4.35	2.93	1.42	1.16	2.96	0.91
ENSRNOG00000029185	Rasa1	RAS p21 protein activator 1 [Source:RGD Symbol;Acc:3537]	0.492	-1.02434	0.000479031	0.00630851	yes	down	7.99	11.97	9.74	5.66	3.97	5.24	2.48	6.87	2.86
ENSRNOG00000019199	Cracr2b	calcium release activated channel regulator 2B [Source:RGD Symbol;Acc:1560911]	195.884	7.61385	0.000479292	0.00630851	yes	up	0	0	0	0	0	3.24	0.09	2.93	2.41
ENSRNOG00000031743	Gbp2	guanylate binding protein 2 [Source:RGD Symbol;Acc:621810]	2.51	1.32745	0.000480705	0.0063222	yes	up	7.41	9.63	7.94	11.53	14.29	17	14.84	16.55	42.38
ENSRNOG00000009590	Stox2	storkhead box 2 [Source:RGD Symbol;Acc:708477]	0.436	-1.19723	0.000482763	0.0063418	yes	down	5.37	9.71	7.01	4.99	2.77	1.35	1.6	3.58	0.78
ENSRNOG00000027040	Ggact	gamma-glutamylamine cyclotransferase [Source:RGD Symbol;Acc:1304748]	5.355	2.42093	0.000482943	0.0063418	yes	up	2.59	2.49	1.1	3.68	2.42	1.63	17.83	7.72	22.22
ENSRNOG00000009331	Hck	HCK proto-oncogene, Src family tyrosine kinase [Source:RGD Symbol;Acc:2785]	2.679	1.42145	0.000484508	0.00634762	yes	up	6.21	4.62	2.75	2.3	4.2	5.35	5.82	6.65	12.4
ENSRNOG00000028845	Ebf1	EBF transcription factor 1 [Source:RGD Symbol;Acc:620953]	0.43	-1.21615	0.000486078	0.00636327	yes	down	5.54	4.79	4.23	6.17	2.49	2.6	0.94	1.23	2.69
ENSRNOG00000008744	Cops2	COP9 signalosome subunit 2 [Source:RGD Symbol;Acc:628791]	0.497	-1.00832	0.000488555	0.00638591	yes	down	21.48	41.76	22	20.44	10.16	16.46	14.02	19.43	8.72
ENSRNOG00000012414	Rhobtb3	Rho-related BTB domain containing 3 [Source:RGD Symbol;Acc:1311683]	0.36	-1.47279	0.00048856	0.00638591	yes	down	1.46	2.38	1.3	1.43	0.57	0.77	0.15	1.11	0.39
ENSRNOG00000016478	Eif5a	eukaryotic translation initiation factor 5A [Source:RGD Symbol;Acc:1308029]	2.169	1.11671	0.000496991	0.00647706	yes	up	396.36	327.11	335.28	362.66	480.21	699.22	861.21	478.18	966.65
ENSRNOG00000003975	Pfn1	profilin 1 [Source:RGD Symbol;Acc:621825]	2.007	1.00495	0.000497116	0.00647706	yes	up	575.75	405.39	462.38	499.18	748.57	801.99	912.88	702.54	1223.09
ENSRNOG00000051300	AABR07039328.2	-	0.476	-1.07127	0.000497896	0.00647706	yes	down	21.92	16.9	22.22	22.29	11.08	13.11	7.32	11.78	4.87
ENSRNOG00000017841	Psme3ip1	proteasome activator subunit 3 interacting protein 1 [Source:RGD Symbol;Acc:1307433]	2.128	1.08916	0.000498206	0.00647706	yes	up	17.83	20.38	15.96	20.95	28.81	36.77	56.34	26.9	32.93
ENSRNOG00000024194	Rsf1	remodeling and spacing factor 1 [Source:RGD Symbol;Acc:1311245]	0.454	-1.13962	0.000501068	0.00650928	yes	down	5.1	9.25	8.6	4.28	1.25	2.56	1.86	3.53	0.83
ENSRNOG00000048891	Prr14l	proline rich 14-like [Source:RGD Symbol;Acc:1305469]	0.414	-1.27074	0.000508079	0.00659027	yes	down	2	4.58	3.52	2.62	0.96	1.27	0.5	1.92	1.66
ENSRNOG00000019572	Lsm4	LSM4 homolog, U6 small nuclear RNA and mRNA degradation associated [Source:RGD Symbol;Acc:1306808]	2.214	1.14698	0.000510958	0.00661749	yes	up	64.67	52.06	55.15	50.68	71.82	115.81	144.71	84.13	141
ENSRNOG00000027831	Map7d3	MAP7 domain containing 3 [Source:RGD Symbol;Acc:1565514]	0.335	-1.5785	0.000512002	0.00662596	yes	down	4.23	5.9	2.58	6.88	0.69	2.19	1.15	2.95	1.01
ENSRNOG00000007662	Zfp800	zinc finger protein 800 [Source:RGD Symbol;Acc:1560157]	0.496	-1.01229	0.000512976	0.0066335	yes	down	4.2	6	3.97	2.25	2.11	1.97	1.59	2.83	1.34
ENSRNOG00000006940	Ncf4	neutrophil cytosolic factor 4 [Source:RGD Symbol;Acc:1593157]	3.308	1.72608	0.000517233	0.00667329	yes	up	4.07	4.06	2.22	5.56	4.65	7.94	12.3	8.27	24.87
ENSRNOG00000060256	RNaseP_nuc	Nuclear RNase P [Source:RFAM;Acc:RF00009]	0.368	-1.44277	0.000518064	0.00667894	yes	down	11.03	11.22	20.61	2.88	3.98	2.79	4.22	4.25	1.13
ENSRNOG00000054073	AABR07003650.1	-	0.128	-2.96642	0.000525884	0.00676433	yes	down	0.42	1.03	0.55	0.46	0	0	0.12	0.1	0.13
ENSRNOG00000011969	Dock9	dedicator of cytokinesis 9 [Source:RGD Symbol;Acc:629617]	0.485	-1.04486	0.000527695	0.00677735	yes	down	6.91	10.52	13.27	8.16	3.22	2.54	6.01	5.18	2.7
ENSRNOG00000000456	Psmb8	proteasome 20S subunit beta 8 [Source:RGD Symbol;Acc:3426]	2.486	1.31402	0.000533802	0.00684542	yes	up	40.64	35.26	37.81	35.47	77.44	65.03	48.45	61.78	175.01
ENSRNOG00000002215	Mylk	myosin light chain kinase [Source:RGD Symbol;Acc:1310915]	0.463	-1.11082	0.000543767	0.00694694	yes	down	3.8	3.62	5.22	2.79	2.26	1.39	1.33	2.91	0.93
ENSRNOG00000014089	Map3k2	mitogen activated protein kinase kinase kinase 2 [Source:RGD Symbol;Acc:620967]	0.482	-1.05258	0.000546763	0.00697997	yes	down	2.71	2.81	3.7	4.23	1.29	1.47	1.7	1.84	1.3
ENSRNOG00000017728	Edrf1	erythroid differentiation regulatory factor 1 [Source:RGD Symbol;Acc:1306820]	0.499	-1.00346	0.000547583	0.00698519	yes	down	1.44	1.92	1.37	1.27	0.6	0.91	0.66	0.7	0.61
ENSRNOG00000019675	Pycard	PYD and CARD domain containing [Source:RGD Symbol;Acc:628637]	2.565	1.35883	0.000552417	0.00703626	yes	up	36.34	29.42	34.63	35.12	47.34	60.92	104.72	50.64	127.91
ENSRNOG00000029342	Scn7a	sodium voltage-gated channel alpha subunit 7 [Source:RGD Symbol;Acc:61922]	0.337	-1.56857	0.000556562	0.00708375	yes	down	9.16	8.43	9.64	5.55	2.81	2.37	2.43	6.3	0.53
ENSRNOG00000052296	Shank3	SH3 and multiple ankyrin repeat domains 3 [Source:RGD Symbol;Acc:69264]	0.23	-2.11934	0.000564995	0.00718161	yes	down	2.32	1.07	1.92	1.74	0.29	3.02	0.32	0.66	0.05
ENSRNOG00000024998	Trps1	transcriptional repressor GATA binding 1 [Source:RGD Symbol;Acc:1311883]	0.39	-1.35757	0.000568917	0.00721394	yes	down	2.98	5.86	5.32	3.08	1.37	1.16	1.32	3.87	0.76
ENSRNOG00000020178	Cope	coatomer protein complex, subunit epsilon [Source:RGD Symbol;Acc:1306785]	2.234	1.15942	0.000573026	0.00724438	yes	up	188.21	173.54	188.26	245.89	306.67	381.77	539.76	254.09	498.13
ENSRNOG00000020513	Becn1	beclin 1 [Source:RGD Symbol;Acc:620190]	2.028	1.01973	0.000576661	0.00726713	yes	up	42.31	50.1	38.36	41.66	48.93	89.33	100.72	67.53	78.84
ENSRNOG00000047816	Ccs	copper chaperone for superoxide dismutase [Source:RGD Symbol;Acc:620403]	2.035	1.02514	0.000576699	0.00726713	yes	up	70.9	48.79	66.06	74.75	89.86	135.77	158.67	107.97	114.89
ENSRNOG00000061122	LOC102551683	uncharacterized LOC102551683 [Source:RGD Symbol;Acc:7591909]	0.018	-5.82412	0.000576967	0.00726713	yes	down	0.05	1.24	0.55	0.27	0	0	0	0	0
ENSRNOG00000061764	AABR07021812.1	-	0.202	-2.30946	0.000581692	0.00731579	yes	down	0.8	1.34	1.84	1.86	0.44	0.36	0.03	0.7	0.04
ENSRNOG00000012387	Glyatl2	glycine-N-acyltransferase-like 2 [Source:RGD Symbol;Acc:621231]	0.047	-4.41545	0.000584588	0.00734132	yes	down	2.47	0.73	0.19	0.43	0	0	0.03	0.04	0.03
ENSRNOG00000040201	Atp6ap1l	ATPase H+ transporting accessory protein 1 like [Source:RGD Symbol;Acc:1564936]	11.777	3.55786	0.000587056	0.00736686	yes	up	0	0.08	0.15	0.14	0.5	1.68	0.97	1.9	0.27
ENSRNOG00000020201	Yif1a	Yip1 interacting factor homolog A, membrane trafficking protein [Source:RGD Symbol;Acc:628749]	2.235	1.16016	0.000588079	0.00737424	yes	up	76.61	66.34	73.39	95.4	119.54	131.18	235.45	120.34	161.19
ENSRNOG00000001712	Alg3	ALG3, alpha-1,3- mannosyltransferase [Source:RGD Symbol;Acc:1306004]	2.215	1.14733	0.000592655	0.0074165	yes	up	25.7	17.43	18.53	36.27	41.27	45.4	60.37	40.16	58.29
ENSRNOG00000007756	Atg101	autophagy related 101 [Source:RGD Symbol;Acc:1359310]	2.113	1.079	0.000592761	0.0074165	yes	up	36.31	34.67	33.71	36.38	48.86	67.74	88.93	49.43	78.51
ENSRNOG00000012655	Adamts6	ADAM metallopeptidase with thrombospondin type 1 motif, 6 [Source:RGD Symbol;Acc:1307678]	0.158	-2.66322	0.000595531	0.0074402	yes	down	5.66	34.47	14.52	3.17	0.05	0.51	4.31	0.96	0.04
ENSRNOG00000002710	Cnst	consortin, connexin sorting protein [Source:RGD Symbol;Acc:1564833]	0.379	-1.3986	0.000599014	0.0074727	yes	down	1.62	1.83	1.87	1.55	1.03	0.37	0.41	0.88	0.46
ENSRNOG00000014031	Esco1	establishment of sister chromatid cohesion N-acetyltransferase 1 [Source:RGD Symbol;Acc:1596873]	0.462	-1.11427	0.00060792	0.00756711	yes	down	6.48	11.95	9.28	8.04	3.06	5.51	4.66	5.07	2.7
ENSRNOG00000013962	Magi2	membrane associated guanylate kinase, WW and PDZ domain containing 2 [Source:RGD Symbol;Acc:621855]	0.381	-1.39135	0.000610119	0.00758336	yes	down	1.81	5.71	3.48	3.44	1.46	1.18	0.41	1.73	0.99
ENSRNOG00000037198	Usp18	ubiquitin specific peptidase 18 [Source:RGD Symbol;Acc:1359153]	3.075	1.62078	0.000611964	0.00759516	yes	up	10.14	16.74	11.64	18.99	55.86	17.18	33.66	11.94	67.17
ENSRNOG00000055838	AABR07025263.1	-	0.052	-4.27883	0.000614338	0.00761187	yes	down	0.23	0.32	0.17	0.17	0.02	0	0	0.02	0.02
ENSRNOG00000052564	Gpx3	glutathione peroxidase 3 [Source:RGD Symbol;Acc:69224]	2.014	1.00975	0.000614444	0.00761187	yes	up	55.93	75.68	52.44	49	84.44	70.18	77.13	202.2	131.39
ENSRNOG00000004364	Babam2	BRISC and BRCA1 A complex member 2 [Source:RGD Symbol;Acc:735111]	2.148	1.10281	0.000624858	0.0077213	yes	up	17.57	17.73	14.81	20.56	23.1	37.26	45.01	25.96	39.87
ENSRNOG00000027550	Mzf1	myeloid zinc finger 1 [Source:RGD Symbol;Acc:1308391]	0.328	-1.60681	0.000630054	0.00777636	yes	down	3.19	7.49	5.63	4.54	1.13	2.36	0.27	3.31	1.61
ENSRNOG00000000885	Auts2	autism susceptibility candidate 2-like [Source:NCBI gene;Acc:100362819]	0.255	-1.97209	0.000637678	0.00785682	yes	down	1.74	1.13	1.04	1.3	0.62	0.15	0.05	0.58	0.27
ENSRNOG00000058096	AABR07021704.1	-	0.018	-5.76905	0.000644005	0.00791179	yes	down	0.35	0.14	0.4	0.03	0	0	0	0	0
ENSRNOG00000032869	Crygf	crystallin, gamma F [Source:RGD Symbol;Acc:1586353]	0.06	-4.06329	0.000647704	0.00793426	yes	down	4.58	0.48	21.67	2.72	0	0.13	0	0.15	1.72
ENSRNOG00000056228	Atp10a	ATPase phospholipid transporting 10A (putative) [Source:RGD Symbol;Acc:1306150]	0.372	-1.42687	0.000654306	0.00799781	yes	down	2.4	1.73	0.81	2.35	0.6	0.94	0.23	0.7	0.79
ENSRNOG00000032307	Dsel	dermatan sulfate epimerase-like [Source:RGD Symbol;Acc:1307724]	0.482	-1.05431	0.000660922	0.00806705	yes	down	2.58	1.8	2.39	1.64	1.29	1.02	0.69	1.49	0.6
ENSRNOG00000057297	AC141517.1	-	0.122	-3.03912	0.000661809	0.0080691	yes	down	0.21	0.7	0.52	0.46	0	0	0.11	0.11	0.04
ENSRNOG00000029707	Mt-nd4	mitochondrially encoded NADH dehydrogenase 4 [Source:RGD Symbol;Acc:620559]	0.401	-1.31869	0.000662041	0.0080691	yes	down	1369.35	1410.03	716.95	1360.29	838.93	315.76	259.18	826.21	176.93
ENSRNOG00000006889	Ambp	alpha-1-microglobulin/bikunin precursor [Source:RGD Symbol;Acc:2102]	0.059	-4.07806	0.000664022	0.00808743	yes	down	0.24	1.68	11.17	0	0.17	0.39	0	0.26	0.2
ENSRNOG00000037514	Qser1	glutamine and serine rich 1 [Source:RGD Symbol;Acc:1311804]	0.478	-1.06545	0.000675155	0.00817607	yes	down	2.91	3.58	3.61	3.02	1.76	1.59	1.16	2.63	0.6
ENSRNOG00000031174	Arnt	aryl hydrocarbon receptor nuclear translocator [Source:RGD Symbol;Acc:2153]	0.482	-1.0532	0.000676558	0.00818721	yes	down	5.95	9.79	6.04	10.19	4.94	2.64	2.6	4.46	2.43
ENSRNOG00000021795	Fam227a	family with sequence similarity 227, member A [Source:RGD Symbol;Acc:1305939]	0.228	-2.13387	0.00068799	0.00829465	yes	down	3.89	4.33	7.39	2.04	0.11	0.17	0.93	1.32	0.41
ENSRNOG00000049104	LOC100911256	ninein-like [Source:RGD Symbol;Acc:6493757]	0.135	-2.88484	0.00069043	0.00830769	yes	down	0.12	0.36	0.3	0.1	0	0.03	0.03	0.04	0.04
ENSRNOG00000018782	Gmnn	geminin, DNA replication inhibitor [Source:RGD Symbol;Acc:1308137]	2.287	1.19327	0.000694958	0.00835625	yes	up	9.9	11.46	10.33	11.48	15.54	23.42	19.62	16.01	37.74
ENSRNOG00000018642	Leng8	leukocyte receptor cluster member 8 [Source:RGD Symbol;Acc:1306180]	0.487	-1.03872	0.00069863	0.00839444	yes	down	13.33	25.88	16.88	17.13	10.45	5.47	3.71	12.96	4.85
ENSRNOG00000017250	Gmpr	guanosine monophosphate reductase [Source:RGD Symbol;Acc:70980]	2.388	1.25564	0.000699898	0.00839911	yes	up	17.98	22.45	17.9	16.61	26	38.17	69.24	32	31.8
ENSRNOG00000057662	AABR07058192.1	-	0.074	-3.76537	0.000700008	0.00839911	yes	down	0.12	0.86	0.11	0.08	0	0.06	0.02	0.02	0
ENSRNOG00000019189	Acat2	acetyl-CoA acetyltransferase 2 [Source:RGD Symbol;Acc:1359366]	2.078	1.05527	0.000711156	0.0085088	yes	up	29.63	30	20.89	27.69	30.99	45.01	71.89	59.31	49.43
ENSRNOG00000012580	Ccdc141	coiled-coil domain containing 141 [Source:RGD Symbol;Acc:1593250]	0.336	-1.57288	0.000712648	0.00852064	yes	down	3.15	1.03	2.21	1.2	0.4	0.65	2.16	0.82	0.24
ENSRNOG00000048948	AABR07067082.1	-	0.125	-3.00434	0.000714404	0.00852564	yes	down	1.7	2.4	1.97	2.67	0.01	0.24	0.21	0.94	0
ENSRNOG00000015300	Spsb3	splA/ryanodine receptor domain and SOCS box containing 3 [Source:RGD Symbol;Acc:1310936]	2.007	1.00471	0.000714777	0.00852564	yes	up	25.62	16.91	19.05	24.44	27.63	38.89	48.8	35.16	48.86
ENSRNOG00000030222	Tcaf2	TRPM8 channel-associated factor 2 [Source:RGD Symbol;Acc:6487302]	0.395	-1.34134	0.000714917	0.00852564	yes	down	1.33	1.05	0.99	1.96	0.66	0.64	0.22	0.46	0.55
ENSRNOG00000029047	Cubn	cubilin [Source:RGD Symbol;Acc:68355]	0.417	-1.26229	0.00071975	0.00857506	yes	down	4.89	9.27	8.76	8.21	3.6	1.75	2.15	4.03	1.02
ENSRNOG00000003224	Nudt16l1	nudix hydrolase 16 like 1 [Source:RGD Symbol;Acc:1561451]	2.578	1.3661	0.000723934	0.00861152	yes	up	22.97	8.73	12.97	16.12	28.49	35.41	50.9	20.08	40.61
ENSRNOG00000047276	AABR07044711.1	M2 pyruvate kinase-like [Source:NCBI gene;Acc:100362738]	3.06	1.61359	0.00072431	0.00861152	yes	up	4.85	2.39	3.75	2.95	12.93	11.23	51.46	4.78	33.81
ENSRNOG00000032546	Dot1l	DOT1 like histone lysine methyltransferase [Source:RGD Symbol;Acc:1306644]	0.362	-1.46737	0.00072561	0.00861992	yes	down	3.05	6.83	4.69	3.73	2.92	0.91	0.85	2.39	1.03
ENSRNOG00000005668	Ndufa8	NADH:ubiquinone oxidoreductase subunit A8 [Source:RGD Symbol;Acc:1306283]	2.692	1.42865	0.000726032	0.00861992	yes	up	194.21	158.81	212.87	180.92	238.36	412.08	833.69	248.09	468.88
ENSRNOG00000013804	Exoc5	exocyst complex component 5 [Source:RGD Symbol;Acc:708408]	0.497	-1.00797	0.000733094	0.00867433	yes	down	6.73	11.94	7.46	5.64	3.92	4.02	2.38	6.81	2.3
ENSRNOG00000017654	Emc8	ER membrane protein complex subunit 8 [Source:RGD Symbol;Acc:1311219]	2.157	1.10915	0.000733171	0.00867433	yes	up	69.59	57	81.29	66.65	89.44	136.88	200.09	110.51	137.41
ENSRNOG00000043095	Etv3	ETS variant transcription factor 3 [Source:RGD Symbol;Acc:1311577]	0.287	-1.80329	0.000733925	0.00867719	yes	down	0.94	1.69	1.17	1.05	0.14	0.27	0.04	0.63	0.2
ENSRNOG00000009535	Stoml2	stomatin like 2 [Source:RGD Symbol;Acc:1308285]	2.034	1.02416	0.000735916	0.00868862	yes	up	44.54	44.61	43.65	44.85	46.65	97.04	100.75	75.2	93.51
ENSRNOG00000016544	Arhgef28	Rho guanine nucleotide exchange factor 28 [Source:RGD Symbol;Acc:1307061]	0.466	-1.10163	0.000744814	0.00875712	yes	down	36.51	31.89	4.79	7.43	7.18	5.09	1.07	9.47	1.12
ENSRNOG00000008036	Dennd4c	DENN domain containing 4C [Source:RGD Symbol;Acc:1308489]	0.32	-1.64201	0.000745367	0.00875754	yes	down	5.13	7.49	9.71	5.35	1.21	1.43	2.67	2.55	0.38
ENSRNOG00000024452	Carmil2	capping protein regulator and myosin 1 linker 2 [Source:RGD Symbol;Acc:1562390]	0.443	-1.17351	0.000746058	0.0087596	yes	down	0.56	1.43	0.95	1.06	0.39	0.44	0.42	0.4	0.37
ENSRNOG00000020953	Ms4a7	membrane spanning 4-domains A7 [Source:RGD Symbol;Acc:1305549]	5.872	2.55377	0.000751684	0.00881955	yes	up	1.33	0.37	1.49	1.54	2.93	3.19	2.54	1.44	20.92
ENSRNOG00000018735	Cd74	CD74 molecule [Source:RGD Symbol;Acc:2313]	2.199	1.13694	0.000754599	0.00884152	yes	up	179.02	157.16	160.92	319.12	240.64	313.71	527.83	640.96	383.91
ENSRNOG00000062209	AABR07059168.2	-	0.021	-5.55787	0.000757037	0.00885855	yes	down	0.5	1.26	1.24	0.31	0	0	0	0	0
ENSRNOG00000003742	Cdkl5	cyclin-dependent kinase-like 5 [Source:RGD Symbol;Acc:2324133]	0.453	-1.14389	0.000757097	0.00885855	yes	down	2.48	3.88	2.76	1.83	1.51	1.01	0.79	1.91	0.51
ENSRNOG00000030212	Cerkl	ceramide kinase-like [Source:RGD Symbol;Acc:1561057]	0.356	-1.48844	0.000762244	0.00891263	yes	down	9.34	19.36	20.24	13.29	6.43	10.13	1.33	9.54	4.89
ENSRNOG00000049491	RT1-DMb	RT1 class II, locus DMb [Source:RGD Symbol;Acc:735096]	2.312	1.20903	0.00077065	0.00900154	yes	up	21.52	15.74	18.44	37	35.86	44.19	54.67	38.08	67.79
ENSRNOG00000013828	Sirt3	sirtuin 3 [Source:RGD Symbol;Acc:1308374]	2.664	1.41377	0.000771439	0.00900154	yes	up	35.92	45.15	42.4	39.31	47.83	95.07	184.47	61.42	83.32
ENSRNOG00000027271	RGD1359290	Ribosomal_L22 domain containing protein RGD1359290 [Source:RGD Symbol;Acc:1359290]	0.303	-1.72122	0.000774366	0.00901295	yes	down	2.26	3.72	3.21	2.7	0.44	0.98	0.18	1.95	0.52
ENSRNOG00000059710	AABR07039236.1	-	0.028	-5.16057	0.00077875	0.00905571	yes	down	0	0.54	0.39	0.38	0	0	0.04	0	0
ENSRNOG00000003792	Med14	mediator complex subunit 14 [Source:RGD Symbol;Acc:1560170]	0.491	-1.02476	0.000782222	0.00907121	yes	down	2.98	3.62	2.51	3.25	1.86	1.7	1.12	2.21	0.6
ENSRNOG00000013436	Pde7b	phosphodiesterase 7B [Source:RGD Symbol;Acc:621016]	0.446	-1.16493	0.000788028	0.00911983	yes	down	8.81	20	12.15	17.01	2.57	2.21	3.52	4.51	2.06
ENSRNOG00000022249	Mllt10	MLLT10, histone lysine methyltransferase DOT1L cofactor [Source:RGD Symbol;Acc:1310874]	0.468	-1.09674	0.000789278	0.00912808	yes	down	10.35	18.18	13.76	9.3	7.2	5.99	5.63	7.17	3.07
ENSRNOG00000006644	Kdm4c	lysine demethylase 4C [Source:RGD Symbol;Acc:1307528]	0.376	-1.41048	0.000792747	0.00915045	yes	down	7.78	18.04	17.81	9.86	1.81	3.97	3.69	5.22	1.15
ENSRNOG00000005809	Arhgdib	Rho GDP dissociation inhibitor beta [Source:RGD Symbol;Acc:1305383]	2.273	1.1843	0.00079283	0.00915045	yes	up	129.92	80.55	63.47	119.53	142.83	167.65	288.46	170.09	235.98
ENSRNOG00000042308	LOC680200	similar to zinc finger protein 455 [Source:RGD Symbol;Acc:1594231]	0.438	-1.19008	0.000795291	0.00916638	yes	down	3.73	5.98	5.06	4.01	2.08	2.98	2.49	1.77	1.7
ENSRNOG00000029042	Mt-nd6	mitochondrially encoded NADH dehydrogenase 6 [Source:RGD Symbol;Acc:620561]	0.398	-1.3277	0.000811935	0.00932653	yes	down	521.48	427.34	299.27	554.6	352.08	116.14	69.26	275.94	88.25
ENSRNOG00000009217	Fbxo6	F-box protein 6 [Source:RGD Symbol;Acc:620418]	2.173	1.11977	0.000825941	0.0094618	yes	up	99.32	63.72	79.05	104.17	125.82	160.95	249.13	131.19	170.15
ENSRNOG00000013147	Cacna1d	calcium voltage-gated channel subunit alpha1 D [Source:RGD Symbol;Acc:70973]	0.15	-2.73888	0.00082742	0.00946595	yes	down	0.49	0.48	6.27	1.65	0.04	0.03	0	0.13	0.02
ENSRNOG00000012030	AABR07043897.1	-	2.229	1.15621	0.000828454	0.0094714	yes	up	4.38	5.92	4.84	3.55	5.79	11.94	12.02	9.87	8.29
ENSRNOG00000011809	AABR07072449.1	RPGR interacting protein 1 [Source:NCBI gene;Acc:305850]	0.481	-1.05659	0.000830804	0.00949126	yes	down	2.19	3.13	2.27	2.46	1.26	1.3	0.54	1.51	1.23
ENSRNOG00000012770	Spata9	spermatogenesis associated 9 [Source:RGD Symbol;Acc:1308291]	0.199	-2.33245	0.000832244	0.00949126	yes	down	2.37	1.93	1.96	1.5	0.48	0.19	0	0.84	0.46
ENSRNOG00000057396	AABR07005581.1	-	0.047	-4.40313	0.000836223	0.00952064	yes	down	0.23	0.09	0.29	0.13	0	0	0	0.05	0
ENSRNOG00000055496	LOC103690166	zinc finger protein OZF-like [Source:RGD Symbol;Acc:9236890]	0.344	-1.54079	0.000836689	0.00952064	yes	down	3.41	4.51	3.71	1.71	1.46	1.05	0.22	2.38	0.88
ENSRNOG00000013090	Gadd45g	growth arrest and DNA-damage-inducible, gamma [Source:RGD Symbol;Acc:1311796]	2.642	1.40168	0.000840097	0.00954125	yes	up	13.88	7.43	15.59	10.19	15.15	42.54	42.08	19.53	22.57
ENSRNOG00000022635	Dlg2	discs large MAGUK scaffold protein 2 [Source:RGD Symbol;Acc:619895]	0.219	-2.18805	0.000841389	0.00954125	yes	down	5.41	9.28	16.96	4.96	0.78	6.13	3.25	5.67	0.96
ENSRNOG00000037604	Ascc3	activating signal cointegrator 1 complex subunit 3 [Source:RGD Symbol;Acc:1307995]	0.403	-1.31161	0.000848755	0.00960639	yes	down	7.41	8.92	7.61	8.66	7.58	2.53	1.65	3.1	1.88
ENSRNOG00000002750	Rc3h1	ring finger and CCCH-type domains 1 [Source:RGD Symbol;Acc:1563512]	0.483	-1.0494	0.000851484	0.00961866	yes	down	5.69	9.98	8.43	10.18	4.29	4.44	2.78	9.21	2.14
ENSRNOG00000056457	Gpd1	glycerol-3-phosphate dehydrogenase 1 [Source:RGD Symbol;Acc:621381]	2.255	1.17329	0.000857862	0.00968356	yes	up	83.56	162.87	202.99	146.37	125.49	398.18	228.96	403.87	336.68
ENSRNOG00000004912	Itgav	integrin subunit alpha V [Source:RGD Symbol;Acc:1310613]	0.462	-1.11254	0.000858427	0.00968356	yes	down	31.89	36.7	46.01	35.19	18.16	7.99	8.93	15.71	3.62
ENSRNOG00000051831	5_8S_rRNA	5.8S ribosomal RNA [Source:RFAM;Acc:RF00002]	0.305	-1.71497	0.000861537	0.00970574	yes	down	395.55	339.4	146.23	267.36	270.99	13.09	85.47	99.31	63.16
ENSRNOG00000012566	Kcnv2	potassium voltage-gated channel modifier subfamily V member 2 [Source:RGD Symbol;Acc:1309271]	0.015	-6.02773	0.000869267	0.00977983	yes	down	0.28	0.18	0	0.09	0	0	0	0	0
ENSRNOG00000052657	AC241859.1	-	0.08	-3.63619	0.000877048	0.00983476	yes	down	0.98	2.82	1.74	2.01	0	0	0.35	0.26	0
ENSRNOG00000019080	Hsd3b7	hydroxy-delta-5-steroid dehydrogenase, 3 beta- and steroid delta-isomerase 7 [Source:RGD Symbol;Acc:628727]	2.021	1.01476	0.000887282	0.00992983	yes	up	25.58	16.24	19	30.77	33.26	50.58	36.06	35.73	58.96
ENSRNOG00000019943	Slc7a6	solute carrier family 7 member 6 [Source:RGD Symbol;Acc:1309193]	0.478	-1.06544	0.000889433	0.00994734	yes	down	1.61	2.65	2.26	1.86	1.26	0.99	0.91	0.72	0.92
ENSRNOG00000023465	Depp1	DEPP1, autophagy regulator [Source:RGD Symbol;Acc:1565700]	4.556	2.18782	0.000891636	0.00995886	yes	up	2.88	2.69	2.06	0.54	4.22	7.86	20.91	2.95	5.25
